# Supplementary material for: Rational Engineering of Enzyme Allosteric Regulation through Sequence Evolution Analysis
Source: PLoS Comput Biol. 2012 Jul 12;8(7):e1002612. doi: 10.1371/journal.pcbi.1002612 (PMC3395594; doi:10.1371/journal.pcbi.1002612)
Supplement: Table S1 — Conservation scores of catalytic and allosteric sites of 56 allosteric proteins. (XLS) [file pcbi.1002612.s005.xls]

## Sheet: Table S1
Table S1. Conservation scores of catalytic and allosteric sites of 56 allosteric proteins
(A) Catalytic and allosteric site residues were obtained from annotations of curated databases.
PDB	UniProt ID	Swiss-Prot ID	Organism	Enzyme Class	Chain ID	PDB Numbering	Residue	Conservation Score	Catalytic Site	Allosteric Site	Number of aligned sequences having an amino acid/ Number of sequences	Residue variation
11BG	P00669	RNS_BOVIN	Bos taurus	3.1.27.5	A	HIS12:A	38	0.854	1		141/148	H,S,D,I,L,V
11BG	P00669	RNS_BOVIN	Bos taurus	3.1.27.5	A	ASN24:A	50	0.383		1	144/148	S,F,T,N,K,E,V,Q,L,A,P,B,D,I,R,G
11BG	P00669	RNS_BOVIN	Bos taurus	3.1.27.5	A	ASN27:A	53	0.805		1	147/148	F,A,T,N,B,E,Y,D
11BG	P00669	RNS_BOVIN	Bos taurus	3.1.27.5	A	ARG33:A	59	0.683		1	148/148	S,A,T,N,P,K,V,Q,R,I,G,L
11BG	P00669	RNS_BOVIN	Bos taurus	3.1.27.5	A	THR36:A	62	0.659		1	148/148	A,F,S,T,N,P,E,Y,H,Q,R,I
11BG	P00669	RNS_BOVIN	Bos taurus	3.1.27.5	A	LYS41:A	67	0.87	1		148/148	I,R,K,P,Y,V
11BG	P00669	RNS_BOVIN	Bos taurus	3.1.27.5	A	HIS119:A	145	0.952	1		128/148	H,D,N
11BG	P00669	RNS_BOVIN	Bos taurus	3.1.27.5	A	PHE120:A	146	0.244	1		137/148	F,W,X,D,N,Y,L
1A3W	P00549	KPYK1_YEAST	Saccharomyces cerevisiae	2.7.1.40	A	ARG49:A	49	0.976	1		72/73	R
1A3W	P00549	KPYK1_YEAST	Saccharomyces cerevisiae	2.7.1.40	A	ARG91:A	91	0.92	1		73/73	H,I,R
1A3W	P00549	KPYK1_YEAST	Saccharomyces cerevisiae	2.7.1.40	A	LYS240:A	240	0.964	1		73/73	K
1A3W	P00549	KPYK1_YEAST	Saccharomyces cerevisiae	2.7.1.40	A	THR298:A	298	0.96	1		73/73	S,T
1A3W	P00549	KPYK1_YEAST	Saccharomyces cerevisiae	2.7.1.40	A	SER332:A	332	0.936	1		73/73	S,T
1A3W	P00549	KPYK1_YEAST	Saccharomyces cerevisiae	2.7.1.40	A	GLU334:A	334	0.97	1		73/73	E
1A3W	P00549	KPYK1_YEAST	Saccharomyces cerevisiae	2.7.1.40	A	SER402:A	402	0.886		1	73/73	S,T
1A3W	P00549	KPYK1_YEAST	Saccharomyces cerevisiae	2.7.1.40	A	THR403:A	403	0.303		1	73/73	S,T,N,K,Y,E,V,H,Q,M,I,R,L
1A3W	P00549	KPYK1_YEAST	Saccharomyces cerevisiae	2.7.1.40	A	SER404:A	404	0.654		1	73/73	S,T,D,N,K,G
1A3W	P00549	KPYK1_YEAST	Saccharomyces cerevisiae	2.7.1.40	A	GLY405:A	405	0.89		1	73/73	I,G,L
1A3W	P00549	KPYK1_YEAST	Saccharomyces cerevisiae	2.7.1.40	A	THR406:A	406	0.285		1	73/73	A,F,S,T,N,K,Y,E,H,D,R,G
1A3W	P00549	KPYK1_YEAST	Saccharomyces cerevisiae	2.7.1.40	A	THR407:A	407	0.748		1	73/73	S,F,T,E,M,R,G,L
1A3W	P00549	KPYK1_YEAST	Saccharomyces cerevisiae	2.7.1.40	A	TRP452:A	452	0.049		1	73/73	F,S,W,T,N,P,K,E,Y,H,M,D,I,G
1A3W	P00549	KPYK1_YEAST	Saccharomyces cerevisiae	2.7.1.40	A	ARG459:A	459	0.385		1	71/73	F,A,S,T,N,M,R,I,G,L
1A3W	P00549	KPYK1_YEAST	Saccharomyces cerevisiae	2.7.1.40	A	HIS491:A	491	0.273		1	64/73	F,A,S,T,W,N,K,Y,E,H,Q,D,R,G
1A49	P11974	KPYM_RABIT	Oryctolagus cuniculus	2.7.1.40	A	ARG42:A	43	0.768		1	64/73	H,Q,N,R,K
1A49	P11974	KPYM_RABIT	Oryctolagus cuniculus	2.7.1.40	A	ASN43:A	44	0.532		1	71/73	A,S,N,K,R,L
1A49	P11974	KPYM_RABIT	Oryctolagus cuniculus	2.7.1.40	A	ASN69:A	70	0.811		1	72/73	S,T,N,D
1A49	P11974	KPYM_RABIT	Oryctolagus cuniculus	2.7.1.40	A	ARG72:A	73	0.978	1		72/73	R
1A49	P11974	KPYM_RABIT	Oryctolagus cuniculus	2.7.1.40	A	ARG105:A	106	0.261		1	72/73	S,A,F,T,N,K,V,H,Q,M,C,R,I,L
1A49	P11974	KPYM_RABIT	Oryctolagus cuniculus	2.7.1.40	A	ARG119:A	120	0.925	1		73/73	H,I,R
1A49	P11974	KPYM_RABIT	Oryctolagus cuniculus	2.7.1.40	A	LYS269:A	270	0.966	1		73/73	K
1A49	P11974	KPYM_RABIT	Oryctolagus cuniculus	2.7.1.40	A	THR327:A	328	0.963	1		73/73	S,T
1A49	P11974	KPYM_RABIT	Oryctolagus cuniculus	2.7.1.40	A	SER361:A	362	0.94	1		73/73	S,T
1A49	P11974	KPYM_RABIT	Oryctolagus cuniculus	2.7.1.40	A	GLU363:A	364	0.972	1		73/73	E
1A49	P11974	KPYM_RABIT	Oryctolagus cuniculus	2.7.1.40	A	HIS463:A	464	0.426		1	73/73	A,S,T,N,V,H,Q,M,R,G,L
1A49	P11974	KPYM_RABIT	Oryctolagus cuniculus	2.7.1.40	A	ILE468:A	469	0.655		1	73/73	A,T,C,I,L,V
1A49	P11974	KPYM_RABIT	Oryctolagus cuniculus	2.7.1.40	A	PHE469:A	470	0.033		1	73/73	F,W,T,N,K,Y,E,V,H,Q,M,I,L
1A49	P11974	KPYM_RABIT	Oryctolagus cuniculus	2.7.1.40	A	PRO470:A	471	0.634		1	73/73	A,S,T,C,P,G
1ABB	P00489	PYGM_RABIT	Oryctolagus cuniculus	2.4.1.1	A	ASN282:A	283	0.741		1	158/158	S,A,M,N,D,G,V
1ABB	P00489	PYGM_RABIT	Oryctolagus cuniculus	2.4.1.1	A	ASP-	284	0.971		1	158/158	D
1ABB	P00489	PYGM_RABIT	Oryctolagus cuniculus	2.4.1.1	A	ASN-	285	0.495		1	158/158	A,S,T,N,K,E,V,H,Q,M,R,G,L
1ABB	P00489	PYGM_RABIT	Oryctolagus cuniculus	2.4.1.1	A	PHE-	286	0.491	1	1	158/158	F,H,S,Q,M,T,N,P,I,L,V
1ABB	P00489	PYGM_RABIT	Oryctolagus cuniculus	2.4.1.1	A	PHE-	287	0.069		1	158/158	F,S,A,W,T,P,E,Y,V,H,Q,M,D,I,G,L
1ABB	P00489	PYGM_RABIT	Oryctolagus cuniculus	2.4.1.1	A	PRO381:A	382	0.638		1	158/158	A,S,Q,P,E,V
1ABB	P00489	PYGM_RABIT	Oryctolagus cuniculus	2.4.1.1	A	GLU382:A	383	0.886		1	158/158	D,E
1ABB	P00489	PYGM_RABIT	Oryctolagus cuniculus	2.4.1.1	A	LYS568:A	569	0.946	1		157/158	K
1ABB	P00489	PYGM_RABIT	Oryctolagus cuniculus	2.4.1.1	A	ARG569:A	570	0.959	1		157/158	R
1ABB	P00489	PYGM_RABIT	Oryctolagus cuniculus	2.4.1.1	A	HIS571:A	572	0.976		1	157/158	H
1ABB	P00489	PYGM_RABIT	Oryctolagus cuniculus	2.4.1.1	A	GLU572:A	573	0.849		1	157/158	Q,G,E
1ABB	P00489	PYGM_RABIT	Oryctolagus cuniculus	2.4.1.1	A	LYS574:A	575	0.946	1		157/158	K
1ABB	P00489	PYGM_RABIT	Oryctolagus cuniculus	2.4.1.1	A	TYR613:A	614	0.907		1	158/158	Y
1ABB	P00489	PYGM_RABIT	Oryctolagus cuniculus	2.4.1.1	A	THR676:A	677	0.997	1		158/158	T
1ABB	P00489	PYGM_RABIT	Oryctolagus cuniculus	2.4.1.1	A	ARG770:A	771	0.247		1	158/158	F,T,W,N,P,Y,E,V,H,Q,D,R
1ABB	P00489	PYGM_RABIT	Oryctolagus cuniculus	2.4.1.1	A	PHE771:A	772	0.664		1	158/158	F,W,Y
1AON	P0A6F5	CH60_ECOLI	Escherichia coli	Cpn60 chaperonin GroEL	A	ASP52:A	52	0.955	1		151/151	D
1AON	P0A6F5	CH60_ECOLI	Escherichia coli	Cpn61 chaperonin GroEL	A	THR89:A	89	0.995	1		151/151	T
1AON	P0A6F5	CH60_ECOLI	Escherichia coli	Cpn62 chaperonin GroEL	A	THR90:A	90	0.995	1		151/151	T
1AON	P0A6F5	CH60_ECOLI	Escherichia coli	Cpn63 chaperonin GroEL	A	LYS105:A	105	0.629		1	151/151	T,R,K
1AON	P0A6F5	CH60_ECOLI	Escherichia coli	Cpn64 chaperonin GroEL	A	ASP398:A	398	0.834	1		151/151	A,D
1CZA	P19367	HXK1_HUMAN	Homo Sapiens	2.7.1.1	N	ASP23:N	23	0.415		1	21/23	A,Q,D,E
1CZA	P19367	HXK1_HUMAN	Homo Sapiens	2.7.1.1	N	ARG30:N	30	0.396		1	23/23	H,R,K,E
1CZA	P19367	HXK1_HUMAN	Homo Sapiens	2.7.1.1	N	LEU31:N	31	0.279		1	23/23	F,L,Y,V
1CZA	P19367	HXK1_HUMAN	Homo Sapiens	2.7.1.1	N	HIS373:N	373	0.304		1	22/23	H,C,R,Y
1CZA	P19367	HXK1_HUMAN	Homo Sapiens	2.7.1.1	N	PHE380:N	380	0.416		1	22/23	F,T
1CZA	P19367	HXK1_HUMAN	Homo Sapiens	2.7.1.1	N	ASN384:N	384	0.313		1	22/23	H,S,Q,N
1CZA	P19367	HXK1_HUMAN	Homo Sapiens	2.7.1.1	N	ARG425:N	425	0.101		1	22/23	S,C,K,R,E
1CZA	P19367	HXK1_HUMAN	Homo Sapiens	2.7.1.1	N	ARG426:N	426	0.355		1	22/23	R,I,V
1CZA	P19367	HXK1_HUMAN	Homo Sapiens	2.7.1.1	N	ASP657:N	657	0.894	1		21/23	D
1DKR	P14193	KPRS_BACSU	Bacillus subtilis	2.7.6.1	A	SER52:A	53	0.662		1	125/129	A,S,T,N,P,E,H,D,R,G
1DKR	P14193	KPRS_BACSU	Bacillus subtilis	2.7.6.1	A	ARG54:A	55	0.852		1	127/129	S,T,N,K,E,H,M,D,R
1DKR	P14193	KPRS_BACSU	Bacillus subtilis	2.7.6.1	A	ALA85:A	86	0.678		1	127/129	S,A,N,K,E,Y,M,G,L
1DKR	P14193	KPRS_BACSU	Bacillus subtilis	2.7.6.1	A	SER86:A	87	0.928		1	129/129	S,F,Q,C,K,R,G
1DKR	P14193	KPRS_BACSU	Bacillus subtilis	2.7.6.1	A	LYS-	106	0.25		1	129/129	A,Q,T,M,I,K,R,V
1DKR	P14193	KPRS_BACSU	Bacillus subtilis	2.7.6.1	A	ALA	107	0.15		1	129/129	F,S,A,T,P,K,Y,E,V,H,M,D,R
1DKR	P14193	KPRS_BACSU	Bacillus subtilis	2.7.6.1	A	LYS105:A	108	0.1		1	129/129	F,A,S,T,N,K,E,V,Q,M,D,C,R,G,L
1DKR	P14193	KPRS_BACSU	Bacillus subtilis	2.7.6.1	A	SER108:A	109	0.05		1	126/129	A,S,N,P,E,Y,V,H,D,R,G,L
1DKR	P14193	KPRS_BACSU	Bacillus subtilis	2.7.6.1	A	ARG109:A	110	0.9		1	129/129	D,R,G
1DKR	P14193	KPRS_BACSU	Bacillus subtilis	2.7.6.1	A	GLN140:A	141	0.855		1	129/129	S,A,K,V,H,Q,M,R,L
1DKR	P14193	KPRS_BACSU	Bacillus subtilis	2.7.6.1	A	ASP148:A	149	0.741		1	128/129	A,S,T,K,E,V,D,R,L
1DKR	P14193	KPRS_BACSU	Bacillus subtilis	2.7.6.1	A	HIS149:A	150	0.82		1	128/129	S,T,N,P,E,H,Q,D,I,G
1DKR	P14193	KPRS_BACSU	Bacillus subtilis	2.7.6.1	A	ASP223:A	224	0.994	1		128/129	D
1DKR	P14193	KPRS_BACSU	Bacillus subtilis	2.7.6.1	A	ASP224:A	225	0.994	1		128/129	D
1DKR	P14193	KPRS_BACSU	Bacillus subtilis	2.7.6.1	A	ASP227:A	228	0.915	1		128/129	A,S,Q,N,D,E
1DKR	P14193	KPRS_BACSU	Bacillus subtilis	2.7.6.1	A	SER310:A	311	0.909		1	103/129	S,T,P
1DKR	P14193	KPRS_BACSU	Bacillus subtilis	2.7.6.1	A	VAL311:A	312	0.2		1	102/129	M,I,G,L,V
1DKR	P14193	KPRS_BACSU	Bacillus subtilis	2.7.6.1	A	SER312:A	313	0.7		1	101/129	A,S,T,N,H,Q,M,D
1DKR	P14193	KPRS_BACSU	Bacillus subtilis	2.7.6.1	A	TYR313:A	314	0		1	101/129	S,F,A,T,K,P,E,Y,V,M,D,R,I,G,L
1DKR	P14193	KPRS_BACSU	Bacillus subtilis	2.7.6.1	A	LEU314:A	315	0.45		1	101/129	S,M,I,L
1DKR	P14193	KPRS_BACSU	Bacillus subtilis	2.7.6.1	A	PHE315:A	316	0.55		1	101/129	F,Y
1EGY	Q00441	CPXJ_SACEN	Saccharopolyspora erythraea	1.14.-.-	A	VAL237:A	237	0.891		1	228/228	S,F,T,N,Y,V,M,D,I,G,L
1EGY	Q00441	CPXJ_SACEN	Saccharopolyspora erythraea	1.14.-.-	A	LEU238:A	238	0.709		1	228/228	S,A,F,T,V,M,I,L
1EGY	Q00441	CPXJ_SACEN	Saccharopolyspora erythraea	1.14.-.-	A	SER246:A	246	0.923	1		228/228	A,S,M,T,I,G,L,V
1EGY	Q00441	CPXJ_SACEN	Saccharopolyspora erythraea	1.14.-.-	A	GLU360:A	360	0.884	1		228/228	A,S,T,N,E,V,Q,M,I,L
1EGY	Q00441	CPXJ_SACEN	Saccharopolyspora erythraea	1.14.-.-	A	LEU391:A	391	0.03		1	220/228	S,F,T,N,K,E,V,Q,M,C,L,A,P,D,R,I,G
1EGY	Q00441	CPXJ_SACEN	Saccharopolyspora erythraea	1.14.-.-	A	LEU392:A	392	0.048		1	222/228	F,S,T,N,K,E,Y,V,Q,M,C,L,A,P,H,D,R,I
1EYJ	P00636	F16P1_PIG	Sus scrofa	3.1.3.11	A	GLY28:A	29	0.468		1	143/144	S,A,T,N,P,G
1EYJ	P00636	F16P1_PIG	Sus scrofa	3.1.3.11	A	THR31:A	32	0.554		1	144/144	S,A,T,N,K,R,G,V
1EYJ	P00636	F16P1_PIG	Sus scrofa	3.1.3.11	A	LYS50:A	51	0.438		1	144/144	A,F,Q,T,C,R,K,G,L,Y
1EYJ	P00636	F16P1_PIG	Sus scrofa	3.1.3.11	A	ALA51:A	52	0.881		1	144/144	S,A,G
1EYJ	P00636	F16P1_PIG	Sus scrofa	3.1.3.11	A	HIS55:A	56	0.301		1	144/144	N,K,E,H,Q,D,R,G
1EYJ	P00636	F16P1_PIG	Sus scrofa	3.1.3.11	A	ASP68:A	69	0.816	1		144/144	D,G,E
1EYJ	P00636	F16P1_PIG	Sus scrofa	3.1.3.11	A	ASP74:A	75	0.977	1		144/144	D
1EYJ	P00636	F16P1_PIG	Sus scrofa	3.1.3.11	A	GLU98:A	99	0.959	1		144/144	E
1EYJ	P00636	F16P1_PIG	Sus scrofa	3.1.3.11	A	TYR113:A	114	0.777		1	144/144	H,F,W,Y
1EYJ	P00636	F16P1_PIG	Sus scrofa	3.1.3.11	A	MET177:A	178	0.402		1	144/144	A,F,W,T,V,M,I,G,L
1FA9	P06737	PYGL_HUMAN	Homo Sapiens	2.4.1.1	A	ASP42:A	43	0.396		1	158/158	F,A,S,T,N,P,K,Y,E,D,I,R,G,L
1FA9	P06737	PYGL_HUMAN	Homo Sapiens	2.4.1.1	A	TYR75:A	76	0.171		1	158/158	F,A,S,T,N,K,E,Y,H,Q,D,I,R,L
1FA9	P06737	PYGL_HUMAN	Homo Sapiens	2.4.1.1	A	ARG309:A	310	0.49		1	158/158	S,F,A,N,K,Y,E,H,Q,C,D,R,L
1FA9	P06737	PYGL_HUMAN	Homo Sapiens	2.4.1.1	A	ARG310:A	311	0.648		1	158/158	S,T,N,E,H,Q,D,R,I,L
1FA9	P06737	PYGL_HUMAN	Homo Sapiens	2.4.1.1	A	LYS568:A	569	0.947	1		157/158	K
1FA9	P06737	PYGL_HUMAN	Homo Sapiens	2.4.1.1	A	ARG569:A	570	0.961	1		157/158	R
1FA9	P06737	PYGL_HUMAN	Homo Sapiens	2.4.1.1	A	LYS574:A	575	0.947	1		157/158	K
1FCJ	P0A1E3	CYSK_SALTY	Salmonella typhimurium	2.5.1.47	A	ASN7:A	8	0.446		1	121/191	A,T,N,K,V,M,I,R,L
1FCJ	P0A1E3	CYSK_SALTY	Salmonella typhimurium	2.5.1.47	A	SER33:A	34	0.555		1	191/191	F,A,S,K,Y,E,H,M,D,I,G,L
1FCJ	P0A1E3	CYSK_SALTY	Salmonella typhimurium	2.5.1.47	A	ARG34:A	35	0.465		1	191/191	S,A,F,N,K,Y,V,H,Q,M,C,R,L
1FCJ	P0A1E3	CYSK_SALTY	Salmonella typhimurium	2.5.1.47	A	PRO36:A	37	0.842		1	191/191	A,F,W,N,K,P,Y,V,H,R
1FCJ	P0A1E3	CYSK_SALTY	Salmonella typhimurium	2.5.1.47	A	LYS41:A	42	1	1		191/191	K
1FCJ	P0A1E3	CYSK_SALTY	Salmonella typhimurium	2.5.1.47	A	CYS42:A	43	0.717		1	191/191	A,T,P,V,D,C,I,G,L
1FCJ	P0A1E3	CYSK_SALTY	Salmonella typhimurium	2.5.1.47	A	TYR78:A	79	0.524		1	191/191	A,F,W,T,Y,V,H,M,I,L
1FCJ	P0A1E3	CYSK_SALTY	Salmonella typhimurium	2.5.1.47	A	LEU268:A	269	0.614		1	191/191	F,M,I,L,Y,V
1FCJ	P0A1E3	CYSK_SALTY	Salmonella typhimurium	2.5.1.47	A	SER272:A	273	0.944	1		190/191	A,S,T,G,E
1FCJ	P0A1E3	CYSK_SALTY	Salmonella typhimurium	2.5.1.47	A	SER300:A	301	0.904	1		187/191	S,D,G
1FIY	P00864	CAPP_ECOLI	Escherichia coli	4.1.1.31	A	HIS138:A	138	0.986	1		76/78	H
1FIY	P00864	CAPP_ECOLI	Escherichia coli	4.1.1.31	A	ARG396:A	396	0.985	1		78/78	R
1FIY	P00864	CAPP_ECOLI	Escherichia coli	4.1.1.31	A	ARG581:A	581	0.985	1		78/78	R
1FIY	P00864	CAPP_ECOLI	Escherichia coli	4.1.1.31	A	ARG587:A	587	0.985		1	78/78	R
1FIY	P00864	CAPP_ECOLI	Escherichia coli	4.1.1.31	A	ARG699:A	699	0.985	1		78/78	R
1FIY	P00864	CAPP_ECOLI	Escherichia coli	4.1.1.31	A	ARG713:A	713	0.985	1		78/78	R
1FIY	P00864	CAPP_ECOLI	Escherichia coli	4.1.1.31	A	LYS773:A	773	0.896		1	78/78	Q,R,K
1FIY	P00864	CAPP_ECOLI	Escherichia coli	4.1.1.31	A	ARG832:A	832	0.925		1	78/78	A,R
1FIY	P00864	CAPP_ECOLI	Escherichia coli	4.1.1.31	A	ASN881:A	881	0.954		1	78/78	S,N
1FRZ	P0A759	NAGB_ECOLI	Escherichia coli	3.5.99.6	A	ASP72:A	72	0.997	1		93/94	D,Y
1FRZ	P0A759	NAGB_ECOLI	Escherichia coli	3.5.99.6	A	ASP141:A	141	0.929	1		94/94	N,D,E,V
1FRZ	P0A759	NAGB_ECOLI	Escherichia coli	3.5.99.6	A	HIS143:A	143	1	1	1	94/94	H,N
1FRZ	P0A759	NAGB_ECOLI	Escherichia coli	3.5.99.6	A	GLU148:A	148	0.974	1	1	94/94	F,E,L
1FRZ	P0A759	NAGB_ECOLI	Escherichia coli	3.5.99.6	A	ALA150:A	150	0.51		1	94/94	S,A,T,N,K,E,H,Q,C,D,G,L
1FRZ	P0A759	NAGB_ECOLI	Escherichia coli	3.5.99.6	A	SER151:A	151	0.767		1	94/94	F,A,S,T,N,K,E,V,H,Q,I,R,G
1FRZ	P0A759	NAGB_ECOLI	Escherichia coli	3.5.99.6	A	ARG158:A	158	0.582		1	94/94	A,T,N,P,K,E,V,H,Q,D,R,G
1FRZ	P0A759	NAGB_ECOLI	Escherichia coli	3.5.99.6	A	LYS160:A	160	0.793		1	94/94	A,S,F,T,K,Y,V,Q,C,R,I,G
1FRZ	P0A759	NAGB_ECOLI	Escherichia coli	3.5.99.6	A	TYR254:A	254	0.446		1	22/94	A,F,H,R,Y,V
1KV1	Q16539	MK14_HUMAN	Homo Sapiens	2.7.11.24	A	ASP150:A	150	0.989	1		167/167	D
1KV1	Q16539	MK14_HUMAN	Homo Sapiens	2.7.11.24	A	LYS152:A	152	0.909	1		167/167	R,K
1KV1	Q16539	MK14_HUMAN	Homo Sapiens	2.7.11.24	A	SER154:A	154	0.797	1		167/167	H,A,S,Q,T,C,N,K,G
1KV1	Q16539	MK14_HUMAN	Homo Sapiens	2.7.11.24	A	ASN155:A	155	1	1		167/167	N
1KV1	Q16539	MK14_HUMAN	Homo Sapiens	2.7.11.24	A	LEU167:A	167	0.753		1	167/167	A,T,C,G,L
1KV1	Q16539	MK14_HUMAN	Homo Sapiens	2.7.11.24	A	ASP168:A	168	0.95		1	167/167	D,G
1KV1	Q16539	MK14_HUMAN	Homo Sapiens	2.7.11.24	A	PHE169:A	169	0.845		1	167/167	F,L
1KV1	Q16539	MK14_HUMAN	Homo Sapiens	2.7.11.24	A	THR185:A	185	0.964	1		167/167	A,T
1LDN	P00344	LDH_GEOSE	Geobacillus stearothermophilus	1.1.1.27	A	ASP166:A	152	0.991	1		148/148	D
1LDN	P00344	LDH_GEOSE	Geobacillus stearothermophilus	1.1.1.27	A	ARG169:A	155	0.991	1		148/148	R
1LDN	P00344	LDH_GEOSE	Geobacillus stearothermophilus	1.1.1.27	A	GLN183:A	169	0.147		1	148/148	S,A,T,N,K,E,H,Q,D,R,L
1LDN	P00344	LDH_GEOSE	Geobacillus stearothermophilus	1.1.1.27	A	ASN184:A	170	0.699		1	148/148	H,A,S,N,D,E
1LDN	P00344	LDH_GEOSE	Geobacillus stearothermophilus	1.1.1.27	A	HIS186:A	172	0.489		1	147/148	S,T,N,K,E,V,H,Q,D,R
1LDN	P00344	LDH_GEOSE	Geobacillus stearothermophilus	1.1.1.27	A	TYR188:A	174	0.331		1	147/148	S,F,W,T,N,Y,V,H,Q,M,C,R,I,L
1LTH	P19869	LDH2_BIFLO	Bifidobacterium longum	1.1.1.27	R	ASP153:R	154	0.994	1		153/153	D
1LTH	P19869	LDH2_BIFLO	Bifidobacterium longum	1.1.1.27	R	ARG156:R	157	0.982	1		153/153	R
1LTH	P19869	LDH2_BIFLO	Bifidobacterium longum	1.1.1.27	R	ARG158:R	159	0.705		1	153/153	A,S,Q,N,K,R,E
1LTH	P19869	LDH2_BIFLO	Bifidobacterium longum	1.1.1.27	R	ASN171:R	172	0.692		1	153/153	H,A,S,N,D,E
1LTH	P19869	LDH2_BIFLO	Bifidobacterium longum	1.1.1.27	R	HIS173:R	174	0.482		1	152/153	S,T,N,K,E,V,H,Q,D,R
1LTH	P19869	LDH2_BIFLO	Bifidobacterium longum	1.1.1.27	R	TYR175:R	176	0.277		1	152/153	S,F,W,T,N,Y,V,H,Q,M,C,R,I,L
1LTH	P19869	LDH2_BIFLO	Bifidobacterium longum	1.1.1.27	R	HIS180:R	181	0.997	1		153/153	H
1M8P	Q12650	MET3_PENCH	Penicillium chrysogenum	2.7.7.4	A	ARG199:A	199	0.962	1		177/177	A,Q,D,R
1M8P	Q12650	MET3_PENCH	Penicillium chrysogenum	2.7.7.4	A	HIS203:A	203	1	1		177/177	H,D,Y
1M8P	Q12650	MET3_PENCH	Penicillium chrysogenum	2.7.7.4	A	HIS206:A	206	0.978	1		177/177	H,Q,D,R
1M8P	Q12650	MET3_PENCH	Penicillium chrysogenum	2.7.7.4	A	ARG292:A	292	0.985	1		174/177	P,R,G,E
1M8P	Q12650	MET3_PENCH	Penicillium chrysogenum	2.7.7.4	A	ASP434:A	433	0.625		1	40/177	H,D,K,E
1M8P	Q12650	MET3_PENCH	Penicillium chrysogenum	2.7.7.4	A	ARG437:A	436	0.766		1	39/177	S,A,N,K,R
1M8P	Q12650	MET3_PENCH	Penicillium chrysogenum	2.7.7.4	A	PHE446:A	445	0.77		1	35/177	F,I,Y
1M8P	Q12650	MET3_PENCH	Penicillium chrysogenum	2.7.7.4	A	ARG515:A	514	0.579		1	36/177	D,R,K
1M8P	Q12650	MET3_PENCH	Penicillium chrysogenum	2.7.7.4	A	PHE529:A	528	0.567		1	36/177	F,M,L,V
1NXG	P0ABH7	CISY_ECOLI	Escherichia coli	2.3.3.1	A	THR106:A	107	0.219		1	65/67	A,F,T,K,E,Q,C,D,R,G
1NXG	P0ABH7	CISY_ECOLI	Escherichia coli	2.3.3.1	A	THR108:A	109	0.207		1	66/67	S,A,T,N,K,V,H,Q,M,I,R
1NXG	P0ABH7	CISY_ECOLI	Escherichia coli	2.3.3.1	A	ARG109:A	110	0.069		1	66/67	A,S,T,N,K,E,H,Q,D,I,R
1NXG	P0ABH7	CISY_ECOLI	Escherichia coli	2.3.3.1	A	THR111:A	112	0.54		1	66/67	A,S,T,Y,V,M,R,G
1NXG	P0ABH7	CISY_ECOLI	Escherichia coli	2.3.3.1	A	MET112:A	113	0.064		1	67/67	F,S,A,T,N,P,K,E,V,H,Q,M,D,R,I,G,L
1NXG	P0ABH7	CISY_ECOLI	Escherichia coli	2.3.3.1	A	HIS114:A	115	0.658		1	67/67	S,A,N,K,P,Y,E,H,D
1NXG	P0ABH7	CISY_ECOLI	Escherichia coli	2.3.3.1	A	TYR145:A	146	0.787		1	64/67	H,S,N,D,Y,L
1NXG	P0ABH7	CISY_ECOLI	Escherichia coli	2.3.3.1	A	ILE159:A	160	0.36		1	67/67	A,S,T,K,E,V,D,I,R,L
1NXG	P0ABH7	CISY_ECOLI	Escherichia coli	2.3.3.1	A	ARG163:A	164	0.559		1	67/67	S,T,N,K,E,Q,M,D,R
1NXG	P0ABH7	CISY_ECOLI	Escherichia coli	2.3.3.1	A	LYS167:A	168	0.496		1	67/67	S,Q,T,I,R,K,Y,V
1NXG	P0ABH7	CISY_ECOLI	Escherichia coli	2.3.3.1	A	ILE180:A	181	0.092		1	66/67	A,S,F,T,N,K,E,Y,V,H,Q,M,I,R
1NXG	P0ABH7	CISY_ECOLI	Escherichia coli	2.3.3.1	A	GLN182:A	183	0.045		1	67/67	A,S,N,K,E,V,H,Q,M,D,R,G,L
1NXG	P0ABH7	CISY_ECOLI	Escherichia coli	2.3.3.1	A	ASN189:A	190	0.144		1	67/67	A,S,N,K,P,E,H,Q,M,D,R,I,G
1NXG	P0ABH7	CISY_ECOLI	Escherichia coli	2.3.3.1	A	THR204:A	205	0.139		1	48/67	F,A,S,T,N,K,Y,E,V,M,R,G,L
1NXG	P0ABH7	CISY_ECOLI	Escherichia coli	2.3.3.1	A	CYS206:A	207	0.111		1	26/67	A,S,T,N,P,Y,C,D
1NXG	P0ABH7	CISY_ECOLI	Escherichia coli	2.3.3.1	A	GLU207:A	208	0.463		1	26/67	Q,T,D,N,R,G,E
1NXG	P0ABH7	CISY_ECOLI	Escherichia coli	2.3.3.1	A	SER234:A	235	1	1		67/67	S
1NXG	P0ABH7	CISY_ECOLI	Escherichia coli	2.3.3.1	A	HIS264:A	265	0.993	1		67/67	H
1NXG	P0ABH7	CISY_ECOLI	Escherichia coli	2.3.3.1	A	HIS305:A	306	0.993	1		67/67	H
1NXG	P0ABH7	CISY_ECOLI	Escherichia coli	2.3.3.1	A	ASP362:A	363	0.93	1		67/67	D,G,E
1PEQ	Q08698	RIR3_SALTY	Salmonella typhimurium	1.17.4.1	A	CYS178:A	178	0.984	1		52/55	C
1PEQ	Q08698	RIR3_SALTY	Salmonella typhimurium	1.17.4.1	A	ASP185:A	185	0.883		1	53/55	S,F,T,D,R,I
1PEQ	Q08698	RIR3_SALTY	Salmonella typhimurium	1.17.4.1	A	MET187:A	187	0.538		1	53/55	S,T,N,E,V,M,R,I,L
1PEQ	Q08698	RIR3_SALTY	Salmonella typhimurium	1.17.4.1	A	LYS202:A	202	0.806		1	53/55	F,A,S,T,K,Q,C,G,L
1PEQ	Q08698	RIR3_SALTY	Salmonella typhimurium	1.17.4.1	A	ARG215:A	215	0.956		1	53/55	S,D,N,R,G
1PEQ	Q08698	RIR3_SALTY	Salmonella typhimurium	1.17.4.1	A	PRO220:A	220	0.087		1	44/55	S,F,A,W,N,P,K,Y,E,V,H,L
1PEQ	Q08698	RIR3_SALTY	Salmonella typhimurium	1.17.4.1	A	ILE221:A	221	0.946		1	45/55	A,I,L,V
1PEQ	Q08698	RIR3_SALTY	Salmonella typhimurium	1.17.4.1	A	LYS222:A	222	0.479		1	45/55	A,S,T,K,H,M,C,D,R,G
1PEQ	Q08698	RIR3_SALTY	Salmonella typhimurium	1.17.4.1	A	SER229:A	229	0.78		1	51/55	A,S,T,N,K,Q,R,G
1PEQ	Q08698	RIR3_SALTY	Salmonella typhimurium	1.17.4.1	A	TYR244:A	244	0.74		1	55/55	F,S,A,T,Y,E,V,I
1PEQ	Q08698	RIR3_SALTY	Salmonella typhimurium	1.17.4.1	A	ASN246:A	246	0.914		1	55/55	S,N,D,K,E
1PEQ	Q08698	RIR3_SALTY	Salmonella typhimurium	1.17.4.1	A	LEU-	248	0.646		1	54/55	Q,M,D,K,G,E,L
1PEQ	Q08698	RIR3_SALTY	Salmonella typhimurium	1.17.4.1	A	ASN386:A	386	0.988	1		55/55	N,P,G
1PEQ	Q08698	RIR3_SALTY	Salmonella typhimurium	1.17.4.1	A	CYS388:A	388	0.96	1		55/55	S,F,C
1PEQ	Q08698	RIR3_SALTY	Salmonella typhimurium	1.17.4.1	A	GLU390:A	390	0.992	1		54/55	D,E
1PEQ	Q08698	RIR3_SALTY	Salmonella typhimurium	1.17.4.1	A	CYS415:A	415	0.972	1		55/55	A,C
1PFK	P0A796	K6PF1_ECOLI	Escherichia coli	2.7.1.11	A	GLY11:A	12	0.903	1		119/120	A,S,R,G
1PFK	P0A796	K6PF1_ECOLI	Escherichia coli	2.7.1.11	A	ARG21:A	22	0.828		1	119/120	H,S,A,W,R,I,Y,V
1PFK	P0A796	K6PF1_ECOLI	Escherichia coli	2.7.1.11	A	ARG25:A	26	0.653		1	119/120	S,A,T,N,K,H,M,D,R,G,L
1PFK	P0A796	K6PF1_ECOLI	Escherichia coli	2.7.1.11	A	ARG54:A	55	0.204		1	120/120	S,A,T,W,N,K,P,E,Y,V,Q,D,I,R,G,L
1PFK	P0A796	K6PF1_ECOLI	Escherichia coli	2.7.1.11	A	TYR55:A	56	0.038		1	120/120	S,T,N,K,Y,E,Q,M,L,A,P,H,D,I,R,G
1PFK	P0A796	K6PF1_ECOLI	Escherichia coli	2.7.1.11	A	SER58:A	59	0.323		1	120/120	A,S,T,N,K,P,E,Y,H,Q,D,R,G,L
1PFK	P0A796	K6PF1_ECOLI	Escherichia coli	2.7.1.11	A	ASP59:A	60	0.239		1	120/120	S,A,T,N,P,E,V,H,M,D,R,G
1PFK	P0A796	K6PF1_ECOLI	Escherichia coli	2.7.1.11	A	ARG72:A	73	0.866	1		120/120	H,A,T,N,K,R,G
1PFK	P0A796	K6PF1_ECOLI	Escherichia coli	2.7.1.11	A	THR125:A	126	0.994	1		120/120	S,T
1PFK	P0A796	K6PF1_ECOLI	Escherichia coli	2.7.1.11	A	ASP127:A	128	0.96	1		120/120	A,S,N,D
1PFK	P0A796	K6PF1_ECOLI	Escherichia coli	2.7.1.11	A	ARG154:A	155	0.474		1	120/120	F,S,T,N,K,Y,E,V,Q,M,C,L,H,D,R,I,G
1PFK	P0A796	K6PF1_ECOLI	Escherichia coli	2.7.1.11	A	ARG171:A	172	0.916	1		119/120	H,A,S,R,G
1PFK	P0A796	K6PF1_ECOLI	Escherichia coli	2.7.1.11	A	GLY185:A	186	0.787		1	120/120	A,S,N,K,E,H,D,G
1PFK	P0A796	K6PF1_ECOLI	Escherichia coli	2.7.1.11	A	GLU187:A	188	0.596		1	120/120	S,T,N,Y,E,V,H,Q,M,D,I,L
1PFK	P0A796	K6PF1_ECOLI	Escherichia coli	2.7.1.11	A	LYS211:A	212	0.044		1	119/120	S,T,N,K,Y,E,V,Q,M,C,L,A,W,P,H,D,R,I,G
1PFK	P0A796	K6PF1_ECOLI	Escherichia coli	2.7.1.11	A	LYS213:A	214	0.43		1	120/120	A,S,K,E,Y,V,H,Q,M,D,I,R,L
1PFK	P0A796	K6PF1_ECOLI	Escherichia coli	2.7.1.11	A	LYS214:A	215	0.261		1	120/120	F,S,T,N,K,E,Y,V,Q,M,L,P,H,D,R,I,G
1PFK	P0A796	K6PF1_ECOLI	Escherichia coli	2.7.1.11	A	HIS215:A	216	0.493		1	120/120	F,S,T,N,K,Y,V,Q,C,L,A,H,D,R,I,G
1PJ2	P23368	MAOM_HUMAN	Homo Sapiens	1.1.1.38	A	GLU59:A	59	0.159		1	49/55	S,F,N,E,V,Q,M,I,L
1PJ2	P23368	MAOM_HUMAN	Homo Sapiens	1.1.1.38	A	GLN64:A	64	0.929		1	50/55	Q,E
1PJ2	P23368	MAOM_HUMAN	Homo Sapiens	1.1.1.38	A	ARG67:A	67	0.771		1	50/55	S,Q,R,K
1PJ2	P23368	MAOM_HUMAN	Homo Sapiens	1.1.1.38	A	ARG91:A	91	0.652		1	50/55	Q,M,T,N,R,K
1PJ2	P23368	MAOM_HUMAN	Homo Sapiens	1.1.1.38	A	ASP102:A	102	0.183		1	50/55	A,S,N,K,E,V,Q,D,R,G
1PJ2	P23368	MAOM_HUMAN	Homo Sapiens	1.1.1.38	A	TYR112:A	112	0.88	1		55/55	S,Y
1PJ2	P23368	MAOM_HUMAN	Homo Sapiens	1.1.1.38	A	LYS183:A	183	0.985	1		55/55	K
1PJ2	P23368	MAOM_HUMAN	Homo Sapiens	1.1.1.38	A	ASP278:A	278	0.937	1		55/55	D,V
1PSD	P0A9T0	SERA_ECOLI	Escherichia coli	1.1.1.95	A	GLU269:A	269	0.993	1		131/131	Q,E
1PSD	P0A9T0	SERA_ECOLI	Escherichia coli	1.1.1.95	A	HIS292:A	292	1	1		131/131	H
1PSD	P0A9T0	SERA_ECOLI	Escherichia coli	1.1.1.95	A	HIS344:A	344	0.564		1	65/131	A,H,F,I,G,L,Y,V
1PSD	P0A9T0	SERA_ECOLI	Escherichia coli	1.1.1.95	A	ASN346:A	346	0.111		1	65/131	S,A,T,N,K,E,V,Q,M,C,D,I,R,L
1PSD	P0A9T0	SERA_ECOLI	Escherichia coli	1.1.1.95	A	ARG347:A	347	0.464		1	65/131	A,W,T,K,V,H,M,C,I,R,L
1PSD	P0A9T0	SERA_ECOLI	Escherichia coli	1.1.1.95	A	PRO348:A	348	0.184		1	65/131	A,S,T,P,E,Y,V,M,C,I,G,L
1PSD	P0A9T0	SERA_ECOLI	Escherichia coli	1.1.1.95	A	ASN364:A	364	0.157		1	46/131	S,F,A,T,N,K,E,V,Q,M,C,D,I,R,G
1Q0B	P52732	KIF11_HUMAN	Homo Sapiens	kinesin family member 11	A	MET115:A	115	0.837		1	118/118	M,I,L,V
1Q0B	P52732	KIF11_HUMAN	Homo Sapiens	kinesin family member 11	A	GLU116:A	116	0.443		1	117/118	S,T,E,Y,V,Q,M,D,I,G,L
1Q0B	P52732	KIF11_HUMAN	Homo Sapiens	kinesin family member 11	A	GLY117:A	117	0.878		1	117/118	S,T,M,N,G,E
1Q0B	P52732	KIF11_HUMAN	Homo Sapiens	kinesin family member 11	A	GLU118:A	118	0.148		1	9/118	H,N,C,G,L,E
1Q0B	P52732	KIF11_HUMAN	Homo Sapiens	kinesin family member 11	A	ARG119:A	119	0.219		1	12/118	S,K,R,P,G,E
1Q0B	P52732	KIF11_HUMAN	Homo Sapiens	kinesin family member 11	A	SER120:A	120	0.26		1	12/118	S,T,N,D,R,P,G
1Q0B	P52732	KIF11_HUMAN	Homo Sapiens	kinesin family member 11	A	PRO121:A	121	0.257		1	15/118	A,S,T,D,P,E,V
1Q0B	P52732	KIF11_HUMAN	Homo Sapiens	kinesin family member 11	A	ASN122:A	122	0.088		1	22/118	A,T,N,K,P,E,Q,M,D,G,L
1Q0B	P52732	KIF11_HUMAN	Homo Sapiens	kinesin family member 11	A	GLU123:A	123	0.096		1	39/118	A,S,T,K,P,Y,E,V,Q,D,G,L
1Q0B	P52732	KIF11_HUMAN	Homo Sapiens	kinesin family member 11	A	GLU124:A	124	0.066		1	39/118	S,F,A,T,K,P,E,V,H,Q,D,C,G,L
1Q0B	P52732	KIF11_HUMAN	Homo Sapiens	kinesin family member 11	A	TYR125:A	125	0.118		1	47/118	F,S,A,T,N,P,Y,E,V,H,D,I,G,L
1Q0B	P52732	KIF11_HUMAN	Homo Sapiens	kinesin family member 11	A	THR126:A	126	0.066		1	76/118	F,S,A,T,N,P,K,E,V,D,C,I,R,G,L
1Q0B	P52732	KIF11_HUMAN	Homo Sapiens	kinesin family member 11	A	TRP127:A	127	0.036		1	81/118	A,S,W,T,N,P,K,E,V,Q,M,D,I,R,G,L
1Q0B	P52732	KIF11_HUMAN	Homo Sapiens	kinesin family member 11	A	ASP130:A	130	0.14		1	113/118	F,S,A,N,K,P,Y,E,V,H,Q,M,D,R,G
1Q0B	P52732	KIF11_HUMAN	Homo Sapiens	kinesin family member 11	A	LEU132:A	132	0.123		1	117/118	A,S,T,N,K,Y,E,H,Q,M,D,R,G,L
1Q0B	P52732	KIF11_HUMAN	Homo Sapiens	kinesin family member 11	A	ALA133:A	133	0.279		1	118/118	S,A,T,N,K,P,E,V,H,Q,M,D,I,R,G,L
1Q0B	P52732	KIF11_HUMAN	Homo Sapiens	kinesin family member 11	A	GLY134:A	134	0.987		1	118/118	G
1Q0B	P52732	KIF11_HUMAN	Homo Sapiens	kinesin family member 11	A	ILE136:A	136	0.675		1	118/118	A,T,N,Y,V,Q,M,I,L
1Q0B	P52732	KIF11_HUMAN	Homo Sapiens	kinesin family member 11	A	PRO137:A	137	0.705		1	118/118	S,F,A,P,Y,V,Q,I
1Q0B	P52732	KIF11_HUMAN	Homo Sapiens	kinesin family member 11	A	LEU161:A	161	0.476		1	118/118	F,A,M,I,L,Y,V
1Q0B	P52732	KIF11_HUMAN	Homo Sapiens	kinesin family member 11	A	TYR211:A	211	0.143		1	118/118	S,F,T,N,K,Y,E,V,Q,M,C,L,A,H,D,I,R
1Q0B	P52732	KIF11_HUMAN	Homo Sapiens	kinesin family member 11	A	LEU214:A	214	0.574		1	118/118	F,M,I,L,V
1Q0B	P52732	KIF11_HUMAN	Homo Sapiens	kinesin family member 11	A	GLU215:A	215	0.238		1	118/118	S,F,T,N,K,E,V,Q,M,L,A,W,H,D,R,I
1Q0B	P52732	KIF11_HUMAN	Homo Sapiens	kinesin family member 11	A	GLY217:A	217	0.872		1	118/118	A,C,G,V
1Q0B	P52732	KIF11_HUMAN	Homo Sapiens	kinesin family member 11	A	ALA218:A	218	0.432		1	118/118	S,F,T,N,K,E,V,Q,M,L,A,W,H,D,I,R,G
1Q0B	P52732	KIF11_HUMAN	Homo Sapiens	kinesin family member 11	A	ARG221:A	221	0.921		1	118/118	S,K,I,R,G
1Q0B	P52732	KIF11_HUMAN	Homo Sapiens	kinesin family member 11	A	PHE239:A	239	0.618		1	118/118	F,T,C,I,L,V
1Q0B	P52732	KIF11_HUMAN	Homo Sapiens	kinesin family member 11	A	GLY268:A	268	0.881	1		118/118	A,S,I,G
1QW7	P0A434	OPD_BREDI	Brevundimonas diminuta	3.1.8.1	A	GLY50:A	50	0.965		1	67/159	T,D,G
1QW7	P0A434	OPD_BREDI	Brevundimonas diminuta	3.1.8.1	A	PHE51:A	51	0.219		1	70/159	S,F,A,P,K,Y,V,H,M,C,I,R,L
1QW7	P0A434	OPD_BREDI	Brevundimonas diminuta	3.1.8.1	A	ALA93:A	93	0.21		1	155/159	S,F,A,N,K,Y,E,V,H,Q,M,C,I,R,L
1QW7	P0A434	OPD_BREDI	Brevundimonas diminuta	3.1.8.1	A	GLY94:A	94	0.824		1	155/159	A,S,N,K,E,Q,D,R,G
1QW7	P0A434	OPD_BREDI	Brevundimonas diminuta	3.1.8.1	A	VAL95:A	95	0.902		1	155/159	T,W,M,I,G,L,V
1QW7	P0A434	OPD_BREDI	Brevundimonas diminuta	3.1.8.1	A	ASP233:A	233	0.833	1		159/159	A,S,T,N,P,K,Y,E,V,H,D,R,G,L
1QW7	P0A434	OPD_BREDI	Brevundimonas diminuta	3.1.8.1	A	ARG254:A	254	0.932	1		155/159	A,T,E,H,M,D,R,G,L
1QW7	P0A434	OPD_BREDI	Brevundimonas diminuta	3.1.8.1	A	ASP301:A	301	0.992	1		156/159	A,D
1QW7	P0A434	OPD_BREDI	Brevundimonas diminuta	3.1.8.1	A	PRO329:A	329	0.429		1	150/159	A,S,F,T,K,P,E,V,H,M,C,R,I,L
1QW7	P0A434	OPD_BREDI	Brevundimonas diminuta	3.1.8.1	A	ILE333:A	333	0.393		1	150/159	A,K,V,Q,M,C,I,R,G,L
1QW7	P0A434	OPD_BREDI	Brevundimonas diminuta	3.1.8.1	A	GLN343:A	343	0		1	148/159	F,S,T,N,K,Y,E,V,Q,M,C,L,A,P,H,D,I,R,G
1QW7	P0A434	OPD_BREDI	Brevundimonas diminuta	3.1.8.1	A	LEU346:A	346	0.363		1	148/159	A,F,M,C,I,L,V
1QW7	P0A434	OPD_BREDI	Brevundimonas diminuta	3.1.8.1	A	ALA347:A	347	0.318		1	148/159	F,S,A,W,T,N,K,E,V,H,Q,M,D,C,R,G
1QW7	P0A434	OPD_BREDI	Brevundimonas diminuta	3.1.8.1	A	THR350:A	350	0.77		1	148/159	F,W,T,H,Q,M,C,I,G,L
1QW7	P0A434	OPD_BREDI	Brevundimonas diminuta	3.1.8.1	A	VAL351:A	351	0.623		1	147/159	A,S,T,W,K,E,Y,V,H,M,R,I,G,L
1S9I	P36507	MP2K2_HUMAN	Homo Sapiens	2.7.12.2	A	LYS101:A	101	0.978		1	162/162	K
1S9I	P36507	MP2K2_HUMAN	Homo Sapiens	2.7.12.2	A	ILE103:A	103	0.819		1	162/162	F,M,I,L,V
1S9I	P36507	MP2K2_HUMAN	Homo Sapiens	2.7.12.2	A	LEU119:A	119	0.7		1	162/162	S,M,N,K,R,I,L,V
1S9I	P36507	MP2K2_HUMAN	Homo Sapiens	2.7.12.2	A	LEU122:A	122	0.935		1	162/162	M,L
1S9I	P36507	MP2K2_HUMAN	Homo Sapiens	2.7.12.2	A	ILE130:A	130	0.714		1	162/162	C,I,L,V
1S9I	P36507	MP2K2_HUMAN	Homo Sapiens	2.7.12.2	A	VAL131:A	131	0.836		1	162/162	T,M,I,V
1S9I	P36507	MP2K2_HUMAN	Homo Sapiens	2.7.12.2	A	ILE145:A	145	0.595		1	162/162	F,M,I,L,V
1S9I	P36507	MP2K2_HUMAN	Homo Sapiens	2.7.12.2	A	MET147:A	147	0.689		1	162/162	S,F,T,N,Y,Q,M,L
1S9I	P36507	MP2K2_HUMAN	Homo Sapiens	2.7.12.2	A	ASP194:A	194	0.995	1		162/162	D
1S9I	P36507	MP2K2_HUMAN	Homo Sapiens	2.7.12.2	A	LYS196:A	196	0.978	1		162/162	K
1S9I	P36507	MP2K2_HUMAN	Homo Sapiens	2.7.12.2	A	SER198:A	198	0.85	1		162/162	A,S,T,N,P,K,E,Q,D,G
1S9I	P36507	MP2K2_HUMAN	Homo Sapiens	2.7.12.2	A	ASN199:A	199	1	1		162/162	N
1S9I	P36507	MP2K2_HUMAN	Homo Sapiens	2.7.12.2	A	PHE213:A	213	0.947		1	162/162	F,L
1S9I	P36507	MP2K2_HUMAN	Homo Sapiens	2.7.12.2	A	SER216:A	216	0.87		1	162/162	A,S,C,G
1S9I	P36507	MP2K2_HUMAN	Homo Sapiens	2.7.12.2	A	LEU219:A	219	0.275		1	162/162	S,F,A,T,N,K,P,Y,E,V,M,D,I,G,L
1S9I	P36507	MP2K2_HUMAN	Homo Sapiens	2.7.12.2	A	ILE220:A	220	0.27		1	162/162	A,S,T,N,K,E,V,Q,C,D,R,I,G,L
1S9I	P36507	MP2K2_HUMAN	Homo Sapiens	2.7.12.2	A	MET223:A	223	0.309		1	150/162	S,F,A,T,N,K,P,Y,V,Q,M,C,R,I,G,L
1S9I	P36507	MP2K2_HUMAN	Homo Sapiens	2.7.12.2	A	THR230:A	230	0.972	1		162/162	S,T
1S9I	P36507	MP2K2_HUMAN	Homo Sapiens	2.7.12.2	A	MET234:A	234	0.916		1	162/162	A,M,I,R,L,V
1S9J	Q02750	MP2K1_HUMAN	Homo Sapiens	2.7.12.2	A	LYS97:A	97	0.98		1	158/158	K
1S9J	Q02750	MP2K1_HUMAN	Homo Sapiens	2.7.12.2	A	LEU115:A	115	0.698		1	158/158	S,F,N,K,V,M,I,R,L
1S9J	Q02750	MP2K1_HUMAN	Homo Sapiens	2.7.12.2	A	LEU118:A	118	0.909		1	158/158	M,N,L
1S9J	Q02750	MP2K1_HUMAN	Homo Sapiens	2.7.12.2	A	VAL127:A	127	0.815		1	158/158	T,M,I,V
1S9J	Q02750	MP2K1_HUMAN	Homo Sapiens	2.7.12.2	A	MET143:A	143	0.668		1	158/158	S,F,Q,T,M,N,Y,L
1S9J	Q02750	MP2K1_HUMAN	Homo Sapiens	2.7.12.2	A	ASP190:A	190	0.995	1		158/158	D
1S9J	Q02750	MP2K1_HUMAN	Homo Sapiens	2.7.12.2	A	LYS192:A	192	0.956	1		158/158	R,K
1S9J	Q02750	MP2K1_HUMAN	Homo Sapiens	2.7.12.2	A	SER194:A	194	0.824	1		158/158	A,S,T,N,K,P,E,Q,D,G
1S9J	Q02750	MP2K1_HUMAN	Homo Sapiens	2.7.12.2	A	ASN195:A	195	1	1		158/158	N
1S9J	Q02750	MP2K1_HUMAN	Homo Sapiens	2.7.12.2	A	VAL211:A	211	0.886		1	158/158	F,M,L,V
1S9J	Q02750	MP2K1_HUMAN	Homo Sapiens	2.7.12.2	A	SER212:A	212	0.88		1	158/158	A,S,C,G
1S9J	Q02750	MP2K1_HUMAN	Homo Sapiens	2.7.12.2	A	LEU215:A	215	0.236		1	146/158	S,A,F,T,N,P,K,E,Y,V,M,I,G,L
1S9J	Q02750	MP2K1_HUMAN	Homo Sapiens	2.7.12.2	A	ILE216:A	216	0.309		1	148/158	A,S,T,N,P,E,Q,D,C,R,I,G,L
1S9J	Q02750	MP2K1_HUMAN	Homo Sapiens	2.7.12.2	A	MET219:A	219	0.286		1	157/158	F,S,T,N,K,E,Y,V,Q,M,C,L,A,P,R,I,G
1S9J	Q02750	MP2K1_HUMAN	Homo Sapiens	2.7.12.2	A	THR226:A	226	0.956	1		158/158	S,A,T
1SHJ	P55210	CASP7_HUMAN	Homo Sapiens	3.4.22.60	A	HIS144:A	144	0.989	1		170/170	H,Q,R
1SHJ	P55210	CASP7_HUMAN	Homo Sapiens	3.4.22.60	A	GLY145:A	145	0.97	1		170/170	S,G
1SHJ	P55210	CASP7_HUMAN	Homo Sapiens	3.4.22.60	A	CYS186:A	186	0.943	1		170/170	S,C,Y
1SHJ	P55210	CASP7_HUMAN	Homo Sapiens	3.4.22.60	A	ARG187:A	187	0.92		1	170/170	A,Q,R,G,V
1SHJ	P55210	CASP7_HUMAN	Homo Sapiens	3.4.22.60	A	TYR223:A	223	0.587		1	169/170	F,W,N,K,E,Y,H,M,C,I,R,L
1SHJ	P55210	CASP7_HUMAN	Homo Sapiens	3.4.22.60	A	CYS290:A	290	0.633		1	161/170	A,S,T,N,K,Y,E,V,Q,M,C,I,G,L
1SHJ	P55210	CASP7_HUMAN	Homo Sapiens	3.4.22.60	A	VAL292:A	292	0.476	1		161/170	F,S,T,N,K,Y,E,V,Q,M,C,L,A,W,H,D,R,I
1T48	P18031	PTN1_HUMAN	Homo Sapiens	3.1.3.48	A	TRP179:A	179	0.96		1	100/100	F,W
1T48	P18031	PTN1_HUMAN	Homo Sapiens	3.1.3.48	A	ASP181:A	181	0.768	1	1	100/100	S,A,T,N,E,V,H,Q,M,D,C,G
1T48	P18031	PTN1_HUMAN	Homo Sapiens	3.1.3.48	A	PRO185:A	185	0.91		1	100/100	S,D,P,G,E
1T48	P18031	PTN1_HUMAN	Homo Sapiens	3.1.3.48	A	GLU186:A	186	0.28		1	95/100	F,S,A,T,N,K,P,Y,E,V,H,C,D,G,L
1T48	P18031	PTN1_HUMAN	Homo Sapiens	3.1.3.48	A	PRO188:A	188	0.489		1	99/100	F,A,S,T,K,P,V,C,I,G,L
1T48	P18031	PTN1_HUMAN	Homo Sapiens	3.1.3.48	A	PHE191:A	191	0.6		1	100/100	F,Q,M,T,I,R,L,V
1T48	P18031	PTN1_HUMAN	Homo Sapiens	3.1.3.48	A	LEU192:A	192	0.654		1	100/100	F,A,P,Y,V,M,I,R,L
1T48	P18031	PTN1_HUMAN	Homo Sapiens	3.1.3.48	A	ASN193:A	193	0.203		1	100/100	S,A,T,N,K,E,H,Q,D,I,R,G
1T48	P18031	PTN1_HUMAN	Homo Sapiens	3.1.3.48	A	PHE196:A	196	0.226		1	100/100	F,S,T,N,K,Y,E,V,Q,C,L,A,W,H,D,R,G
1T48	P18031	PTN1_HUMAN	Homo Sapiens	3.1.3.48	A	LYS197:A	197	0.162		1	100/100	F,S,T,N,K,Y,E,V,Q,M,L,A,H,D,I,R
1T48	P18031	PTN1_HUMAN	Homo Sapiens	3.1.3.48	A	GLU200:A	200	0.371		1	99/100	F,S,A,T,N,K,E,H,Q,D,C,R,L
1T48	P18031	PTN1_HUMAN	Homo Sapiens	3.1.3.48	A	CYS215:A	215	0.967	1		100/100	S,D,C
1T48	P18031	PTN1_HUMAN	Homo Sapiens	3.1.3.48	A	ARG221:A	221	0.974	1		100/100	S,Q,T,R
1T48	P18031	PTN1_HUMAN	Homo Sapiens	3.1.3.48	A	SER222:A	222	0.886	1		100/100	S,A,T,L
1T48	P18031	PTN1_HUMAN	Homo Sapiens	3.1.3.48	A	GLU276:A	276	0.64		1	88/100	A,S,N,Y,E,H,Q,C,D,R,L
1T48	P18031	PTN1_HUMAN	Homo Sapiens	3.1.3.48	A	LYS279:A	279	0.095		1	75/100	A,S,T,N,K,E,H,Q,C,I,R,G,L
1T48	P18031	PTN1_HUMAN	Homo Sapiens	3.1.3.48	A	PHE280:A	280	0.196		1	70/100	A,F,S,T,N,K,E,Y,H,Q,C,D,R,G,L
1T48	P18031	PTN1_HUMAN	Homo Sapiens	3.1.3.48	A	TRP291:A	291	0.246		1	18/100	S,W,D,P,R,G,E
1T5A	P14618	KPYM_HUMAN	Homo Sapiens	2.7.1.40	A	ARG73:A	73	0.988	1		72/73	R
1T5A	P14618	KPYM_HUMAN	Homo Sapiens	2.7.1.40	A	ARG120:A	120	0.93	1		73/73	H,I,R
1T5A	P14618	KPYM_HUMAN	Homo Sapiens	2.7.1.40	A	LYS270:A	270	0.969	1		73/73	K
1T5A	P14618	KPYM_HUMAN	Homo Sapiens	2.7.1.40	A	THR328:A	328	0.965	1		73/73	S,T
1T5A	P14618	KPYM_HUMAN	Homo Sapiens	2.7.1.40	A	SER362:A	362	0.944	1		73/73	S,T
1T5A	P14618	KPYM_HUMAN	Homo Sapiens	2.7.1.40	A	GLU364:A	364	0.974	1		73/73	E
1T5A	P14618	KPYM_HUMAN	Homo Sapiens	2.7.1.40	A	THR432:A	432	0.902		1	73/73	S,T
1T5A	P14618	KPYM_HUMAN	Homo Sapiens	2.7.1.40	A	LYS433:A	433	0.283		1	73/73	S,T,N,K,Y,E,V,H,Q,M,I,R,L
1T5A	P14618	KPYM_HUMAN	Homo Sapiens	2.7.1.40	A	SER434:A	434	0.695		1	73/73	S,T,D,N,K,G
1T5A	P14618	KPYM_HUMAN	Homo Sapiens	2.7.1.40	A	ARG436:A	436	0.267		1	73/73	A,F,S,T,N,K,Y,E,H,D,R,G
1T5A	P14618	KPYM_HUMAN	Homo Sapiens	2.7.1.40	A	SER437:A	437	0.774		1	73/73	S,F,T,E,M,R,G,L
1T5A	P14618	KPYM_HUMAN	Homo Sapiens	2.7.1.40	A	TRP482:A	482	0.052		1	73/73	F,S,W,T,N,K,P,Y,E,H,Q,M,D,I,G
1T5A	P14618	KPYM_HUMAN	Homo Sapiens	2.7.1.40	A	ARG489:A	489	0.37		1	73/73	F,A,S,T,W,N,M,R,I,G,L
1T5A	P14618	KPYM_HUMAN	Homo Sapiens	2.7.1.40	A	GLY514:A	514	0.815		1	68/73	S,A,R,G
1T5A	P14618	KPYM_HUMAN	Homo Sapiens	2.7.1.40	A	TRP515:A	515	0.174		1	64/73	F,A,S,T,W,N,V,H,D,I,G
1T5A	P14618	KPYM_HUMAN	Homo Sapiens	2.7.1.40	A	ARG516:A	516	0.389		1	64/73	A,S,T,K,P,V,H,Q,R,I,L
1T5A	P14618	KPYM_HUMAN	Homo Sapiens	2.7.1.40	A	GLY518:A	518	0.341		1	60/73	A,S,F,T,N,P,K,E,V,G
1T5A	P14618	KPYM_HUMAN	Homo Sapiens	2.7.1.40	A	SER519:A	519	0.115		1	67/73	S,A,F,T,K,P,E,V,Q,M,R,I,L
1T5A	P14618	KPYM_HUMAN	Homo Sapiens	2.7.1.40	A	GLY520:A	520	0.679		1	69/73	T,K,E,H,Q,D,R,G
1T5A	P14618	KPYM_HUMAN	Homo Sapiens	2.7.1.40	A	PHE521:A	521	0.278		1	68/73	F,A,S,T,W,N,K,Y,E,H,Q,M,D,R,G
1V4S	P35557	HXK4_HUMAN	Homo Sapiens	2.7.1.2	A	VAL62:A	62	0.774		1	56/56	T,N,I,L,V
1V4S	P35557	HXK4_HUMAN	Homo Sapiens	2.7.1.2	A	ARG63:A	63	0.443		1	55/56	S,A,T,Y,V,H,Q,M,C,D,I,R,G
1V4S	P35557	HXK4_HUMAN	Homo Sapiens	2.7.1.2	A	ASP205:A	205	0.939	1		56/56	N,D,V
1V4S	P35557	HXK4_HUMAN	Homo Sapiens	2.7.1.2	A	MET210:A	210	0.857		1	56/56	F,S,M,Y,L
1V4S	P35557	HXK4_HUMAN	Homo Sapiens	2.7.1.2	A	ILE211:A	211	0.677		1	56/56	S,A,M,I,L,V
1V4S	P35557	HXK4_HUMAN	Homo Sapiens	2.7.1.2	A	TYR214:A	214	0.269		1	56/56	S,A,N,K,Y,E,H,M,C,R,G,L
1V4S	P35557	HXK4_HUMAN	Homo Sapiens	2.7.1.2	A	TYR215:A	215	0.608		1	56/56	F,W,P,L,Y
1V4S	P35557	HXK4_HUMAN	Homo Sapiens	2.7.1.2	A	MET235:A	235	0.573		1	56/56	H,M,I,Y,L,V
1V4S	P35557	HXK4_HUMAN	Homo Sapiens	2.7.1.2	A	VAL452:A	452	0.597		1	46/56	M,T,C,I,L,V
1V4S	P35557	HXK4_HUMAN	Homo Sapiens	2.7.1.2	A	VAL455:A	455	0.69		1	45/56	S,Q,T,M,L,V
1V4S	P35557	HXK4_HUMAN	Homo Sapiens	2.7.1.2	A	ALA456:A	456	0.529		1	42/56	S,A,T,N,E,Y,H,Q,C,G
1W96	Q00955	ACAC_YEAST	Saccharomyces cerevisiae	6.4.1.2	A	LYS73:A	73	0.847		1	142/182	S,T,N,K,E,H,Q,R,G
1W96	Q00955	ACAC_YEAST	Saccharomyces cerevisiae	6.4.1.2	A	ARG76:A	76	0.514		1	148/182	F,W,T,N,K,Q,M,I,R,L
1W96	Q00955	ACAC_YEAST	Saccharomyces cerevisiae	6.4.1.2	A	SER77:A	77	0.706		1	157/182	S,A,Q,T,I,E,V
1W96	Q00955	ACAC_YEAST	Saccharomyces cerevisiae	6.4.1.2	A	LYS252:A	252	0.993	1		182/182	R,K
1W96	Q00955	ACAC_YEAST	Saccharomyces cerevisiae	6.4.1.2	A	GLN302:A	302	0.959	1		182/182	Q,D,I,E,L
1W96	Q00955	ACAC_YEAST	Saccharomyces cerevisiae	6.4.1.2	A	ARG317:A	317	0.973	1		180/182	H,Q,N,R
1W96	Q00955	ACAC_YEAST	Saccharomyces cerevisiae	6.4.1.2	A	VAL386:A	386	0.968		1	182/182	D,N,R,V
1W96	Q00955	ACAC_YEAST	Saccharomyces cerevisiae	6.4.1.2	A	GLU392:A	392	0.955		1	182/182	A,S,Q,M,E,L
1W96	Q00955	ACAC_YEAST	Saccharomyces cerevisiae	6.4.1.2	A	MET393:A	393	0.896		1	182/182	A,Q,M,C,K,I,E,V
1W96	Q00955	ACAC_YEAST	Saccharomyces cerevisiae	6.4.1.2	A	CYS454:A	454	0.702		1	40/182	A,S,C,R,K,E,V
1W96	Q00955	ACAC_YEAST	Saccharomyces cerevisiae	6.4.1.2	A	TRP487:A	487	0.61		1	180/182	F,S,A,W,T,N,Y,M,I,G,L
1W96	Q00955	ACAC_YEAST	Saccharomyces cerevisiae	6.4.1.2	A	PHE510:A	510	0.861		1	180/182	S,F,A,T,N,V,M,I,L
1YXD	P0A6L2	DAPA_ECOLI	Escherichia coli	4.2.1.52	A	THR44:A	44	0.935	1		154/154	S,T,G
1YXD	P0A6L2	DAPA_ECOLI	Escherichia coli	4.2.1.52	A	THR45:A	45	0.932	1		154/154	A,S,F,T,N,G
1YXD	P0A6L2	DAPA_ECOLI	Escherichia coli	4.2.1.52	A	SER48:A	48	0.77		1	154/154	S,F,A,T,W,N,P,Y,V,M,C,G,L
1YXD	P0A6L2	DAPA_ECOLI	Escherichia coli	4.2.1.52	A	ALA49:A	49	0.557		1	154/154	S,F,A,T,N,P,Y,H,Q,M,C,G,L
1YXD	P0A6L2	DAPA_ECOLI	Escherichia coli	4.2.1.52	A	HIS56:A	56	0.705		1	154/154	F,T,N,K,E,Y,V,H,Q,R,I
1YXD	P0A6L2	DAPA_ECOLI	Escherichia coli	4.2.1.52	A	ASN80:A	80	0.822		1	141/154	A,S,T,N,P,Y,E,V,M,I,G,L
1YXD	P0A6L2	DAPA_ECOLI	Escherichia coli	4.2.1.52	A	GLU84:A	84	0.537		1	154/154	A,S,T,N,K,Y,E,V,H,Q,M,C,D,I,L
1YXD	P0A6L2	DAPA_ECOLI	Escherichia coli	4.2.1.52	A	TYR106:A	106	0.863		1	154/154	F,S,P,Y,M,I,G,L
1YXD	P0A6L2	DAPA_ECOLI	Escherichia coli	4.2.1.52	A	TYR133:A	133	0.983	1		154/154	Y
1YXD	P0A6L2	DAPA_ECOLI	Escherichia coli	4.2.1.52	A	ARG138:A	138	0.918	1		150/154	A,M,N,K,R,L
1YXD	P0A6L2	DAPA_ECOLI	Escherichia coli	4.2.1.52	A	LYS161:A	161	1	1		154/154	K
1Z8D	P11217	PYGM_HUMAN	Homo Sapiens	2.4.1.1	A	ASP42:A	43	0.394		1	158/158	F,A,S,T,N,P,K,Y,E,D,I,R,G,L
1Z8D	P11217	PYGM_HUMAN	Homo Sapiens	2.4.1.1	A	TYR75:A	76	0.168		1	157/158	F,A,S,T,N,K,E,Y,H,Q,D,I,R,L
1Z8D	P11217	PYGM_HUMAN	Homo Sapiens	2.4.1.1	A	ARG309:A	310	0.479		1	158/158	S,F,A,N,K,Y,E,H,Q,C,R,I,L
1Z8D	P11217	PYGM_HUMAN	Homo Sapiens	2.4.1.1	A	ARG310:A	311	0.632		1	158/158	S,T,N,E,H,Q,D,I,R,L
1Z8D	P11217	PYGM_HUMAN	Homo Sapiens	2.4.1.1	A	LYS315:A	316	0.352		1	19/158	R,K,I
1Z8D	P11217	PYGM_HUMAN	Homo Sapiens	2.4.1.1	A	PHE316:A	317	0.301		1	19/158	F,K,L,Y
1Z8D	P11217	PYGM_HUMAN	Homo Sapiens	2.4.1.1	A	GLY317:A	318	0.563		1	19/158	D,G
1Z8D	P11217	PYGM_HUMAN	Homo Sapiens	2.4.1.1	A	CYS318:A	319	0.124		1	19/158	S,C,N,V
1Z8D	P11217	PYGM_HUMAN	Homo Sapiens	2.4.1.1	A	LYS568:A	569	0.943	1		157/158	K
1Z8D	P11217	PYGM_HUMAN	Homo Sapiens	2.4.1.1	A	ARG569:A	570	0.972	1		157/158	R
1Z8D	P11217	PYGM_HUMAN	Homo Sapiens	2.4.1.1	A	LYS574:A	575	0.943	1		157/158	K
1Z8D	P11217	PYGM_HUMAN	Homo Sapiens	2.4.1.1	A	THR676:A	677	0.997	1		158/158	T
2BU2	Q15119	PDK2_HUMAN	Homo Sapiens	2.7.11.2	A	LEU63:A	71	0.896		1	59/69	A,T,N,V,M,D,I,G,L
2BU2	Q15119	PDK2_HUMAN	Homo Sapiens	2.7.11.2	A	PRO64:A	72	0.845		1	61/69	A,S,M,I,P,L,V
2BU2	Q15119	PDK2_HUMAN	Homo Sapiens	2.7.11.2	A	ARG66:A	74	0.965		1	61/69	H,Q,T,M,N,R,K,I
2BU2	Q15119	PDK2_HUMAN	Homo Sapiens	2.7.11.2	A	VAL67:A	75	0.934		1	61/69	A,D,I,E,L,V
2BU2	Q15119	PDK2_HUMAN	Homo Sapiens	2.7.11.2	A	SER72:A	80	0.866		1	69/69	S,T,V,H,M,R,I,L
2BU2	Q15119	PDK2_HUMAN	Homo Sapiens	2.7.11.2	A	VAL73:A	81	0.843		1	69/69	A,S,F,T,N,Y,V,H,Q,I,R,G
2BU2	Q15119	PDK2_HUMAN	Homo Sapiens	2.7.11.2	A	MET122:A	130	0.917		1	69/69	M,I,L,V
2BU2	Q15119	PDK2_HUMAN	Homo Sapiens	2.7.11.2	A	GLY125:A	133	0.873		1	69/69	A,Q,N,D,R,P,G,E
2BU2	Q15119	PDK2_HUMAN	Homo Sapiens	2.7.11.2	A	VAL126:A	134	0.906		1	69/69	H,M,I,L,V
2BU2	Q15119	PDK2_HUMAN	Homo Sapiens	2.7.11.2	A	TYR129:A	137	0.667		1	69/69	A,F,S,Y,V,M,I,L
2BU2	Q15119	PDK2_HUMAN	Homo Sapiens	2.7.11.2	A	VAL138:A	146	0.196		1	12/69	F,A,Q,P,Y,V
2BU2	Q15119	PDK2_HUMAN	Homo Sapiens	2.7.11.2	A	SER139:A	147	0.377		1	13/69	S,T,D,I,P
2BU2	Q15119	PDK2_HUMAN	Homo Sapiens	2.7.11.2	A	ASN142:A	150	0.336		1	14/69	S,Q,N,K,G,L
2BU2	Q15119	PDK2_HUMAN	Homo Sapiens	2.7.11.2	A	ILE143:A	151	0.787		1	14/69	M,I,L,V
2BU2	Q15119	PDK2_HUMAN	Homo Sapiens	2.7.11.2	A	PHE146:A	154	0.899		1	14/69	F,L
2BU2	Q15119	PDK2_HUMAN	Homo Sapiens	2.7.11.2	A	LEU147:A	155	0.955		1	14/69	L
2BU2	Q15119	PDK2_HUMAN	Homo Sapiens	2.7.11.2	A	HIS239:A	247	0.932	1		69/69	S,H,Q,T,R,Y
2BU2	Q15119	PDK2_HUMAN	Homo Sapiens	2.7.11.2	A	GLU243:A	251	0.998	1		69/69	N,I,E
2BU2	Q15119	PDK2_HUMAN	Homo Sapiens	2.7.11.2	A	ARG250:A	258	0.822		1	69/69	A,S,T,N,K,E,Q,D,R
2BU2	Q15119	PDK2_HUMAN	Homo Sapiens	2.7.11.2	A	THR302:A	310	0.769		1	68/69	A,S,T,N,V,D,I,G,L
2BU2	Q15119	PDK2_HUMAN	Homo Sapiens	2.7.11.2	A	TYR320:A	328	0.896		1	69/69	F,M,I,K,L,Y,V
2BU2	Q15119	PDK2_HUMAN	Homo Sapiens	2.7.11.2	A	TYR374:A	382	0.054		1	21/69	S,M,T,N,I,G,Y,L,V
2C2B	Q9S7B5	THRC1_ARATH	Arabidopsis thaliana	4.2.3.1	A	TRP101:A	141	0.66		1	2/177	W
2C2B	Q9S7B5	THRC1_ARATH	Arabidopsis thaliana	4.2.3.1	A	PRO102:A	142	0.683		1	2/177	P
2C2B	Q9S7B5	THRC1_ARATH	Arabidopsis thaliana	4.2.3.1	A	GLY104:A	144	0.516		1	3/177	G,V
2C2B	Q9S7B5	THRC1_ARATH	Arabidopsis thaliana	4.2.3.1	A	SER125:A	165	0.326		1	156/177	A,S,T,N,P,K,Y,E,V,H,Q,I,R,G,L
2C2B	Q9S7B5	THRC1_ARATH	Arabidopsis thaliana	4.2.3.1	A	ASN132:A	172	0.796		1	174/177	A,S,N,K,P,E,Q,D,I,G,L
2C2B	Q9S7B5	THRC1_ARATH	Arabidopsis thaliana	4.2.3.1	A	LEU133:A	173	0.708		1	174/177	F,A,K,E,V,Q,M,D,I,R,L
2C2B	Q9S7B5	THRC1_ARATH	Arabidopsis thaliana	4.2.3.1	A	LYS141:A	181	0.122		1	173/177	A,S,N,P,K,Y,E,Q,D,R,L
2C2B	Q9S7B5	THRC1_ARATH	Arabidopsis thaliana	4.2.3.1	A	ASN147:A	187	0.456		1	176/177	S,T,N,K,Y,E,V,M,C,L,A,P,H,D,R,I,G
2C2B	Q9S7B5	THRC1_ARATH	Arabidopsis thaliana	4.2.3.1	A	TRP150:A	190	0.405		1	176/177	S,A,F,W,N,Y,V,H,I,L
2C2B	Q9S7B5	THRC1_ARATH	Arabidopsis thaliana	4.2.3.1	-	LYS-	203	1	1		177/177	K
2C2B	Q9S7B5	THRC1_ARATH	Arabidopsis thaliana	4.2.3.1	A	ASP164:A	204	0.856	1		177/177	F,T,D,I,G,L,V
2C2B	Q9S7B5	THRC1_ARATH	Arabidopsis thaliana	4.2.3.1	A	ASP194:A	234	0.986	1		177/177	Q,M,N,D
2C2B	Q9S7B5	THRC1_ARATH	Arabidopsis thaliana	4.2.3.1	A	LYS272:A	312	0.588	1		172/177	S,A,T,K,E,V,H,Q,C,R,G,L
2C2B	Q9S7B5	THRC1_ARATH	Arabidopsis thaliana	4.2.3.1	A	HIS404:A	444	0.949	1		177/177	S,A,H,T,G,E
2C2B	Q9S7B5	THRC1_ARATH	Arabidopsis thaliana	4.2.3.1	A	THR432:A	472	0.97	1		176/177	A,S,T,C,P
2CLH	P00929	TRPA_SALTY	Salmonella typhimurium	4.2.1.20	A	GLU49:A	49	1	1	1	149/151	E
2CLH	P00929	TRPA_SALTY	Salmonella typhimurium	4.2.1.20	A	ASP60:A	60	0.989	1	1	149/151	D,E
2CLH	P00929	TRPA_SALTY	Salmonella typhimurium	4.2.1.20	A	TYR102:A	102	0.952		1	149/151	S,C,Y
2CLH	P00929	TRPA_SALTY	Salmonella typhimurium	4.2.1.20	A	TYR175:A	175	0.989	1	1	149/151	Y
2CLH	P00929	TRPA_SALTY	Salmonella typhimurium	4.2.1.20	A	THR183:A	183	1		1	151/151	T,R,P
2EWN	P06709	BIRA_ECOLI	Escherichia coli	6.3.4.15	A	ARG118:A	118	1	1		163/163	R
2EWN	P06709	BIRA_ECOLI	Escherichia coli	6.3.4.15	A	ARG182:A	182	0.479		1	163/163	A,F,N,K,E,Y,V,H,Q,C,R,G,L
2EWN	P06709	BIRA_ECOLI	Escherichia coli	6.3.4.15	A	LYS183:A	183	1	1		163/163	K
2EWN	P06709	BIRA_ECOLI	Escherichia coli	6.3.4.15	A	VAL214:A	214	0.188		1	149/163	S,A,T,N,P,K,E,V,H,Q,M,D,R,G,L
2EWN	P06709	BIRA_ECOLI	Escherichia coli	6.3.4.15	A	VAL219:A	219	0.691		1	160/163	A,F,T,P,I,L,V
2EWN	P06709	BIRA_ECOLI	Escherichia coli	6.3.4.15	A	TRP223:A	223	0.847		1	162/163	S,A,W,K,P,Y,V,Q,M,I,L
2EWN	P06709	BIRA_ECOLI	Escherichia coli	6.3.4.15	A	GLU228:A	228	0.263		1	150/163	S,T,N,K,Y,E,V,Q,L,A,W,P,H,D,I,R,G
2EWN	P06709	BIRA_ECOLI	Escherichia coli	6.3.4.15	A	ARG317:A	317	0.857	1		115/163	S,Q,T,N,I,R,K,L
2FQQ	P29466	CASP1_HUMAN	Homo Sapiens	3.4.22.36	A	HIS237:A	237	0.955	1		51/51	H,R,L
2FQQ	P29466	CASP1_HUMAN	Homo Sapiens	3.4.22.36	A	GLY238:A	238	0.961	1		51/51	G
2FQQ	P29466	CASP1_HUMAN	Homo Sapiens	3.4.22.36	A	ALA285:A	285	0.916	1		49/51	A,C
2FQQ	P29466	CASP1_HUMAN	Homo Sapiens	3.4.22.36	A	ARG286:A	286	0.859	1	1	49/51	Q,R,G
2GS7	P00533	EGFR_HUMAN	Homo Sapiens	2.7.10.1	A	LEU680:A	704	0.338		1	99/120	A,T,K,E,V,Q,M,D,R,L
2GS7	P00533	EGFR_HUMAN	Homo Sapiens	2.7.10.1	A	ILE682:A	706	0.766		1	117/120	A,E,V,H,M,I,G,L
2GS7	P00533	EGFR_HUMAN	Homo Sapiens	2.7.10.1	A	LEU736:A	760	0.587		1	120/120	A,F,K,V,H,Q,M,I,L
2GS7	P00533	EGFR_HUMAN	Homo Sapiens	2.7.10.1	A	LEU758:A	782	0.624		1	120/120	A,S,F,T,P,E,V,M,I,G,L
2GS7	P00533	EGFR_HUMAN	Homo Sapiens	2.7.10.1	A	VAL762:A	786	0.487		1	119/120	F,A,T,K,P,Y,E,V,Q,M,R,I,L
2GS7	P00533	EGFR_HUMAN	Homo Sapiens	2.7.10.1	A	ASP813:A	837	0.991	1		120/120	D
2GS7	P00533	EGFR_HUMAN	Homo Sapiens	2.7.10.1	A	ALA815:A	839	0.955	1		120/120	A,R
2GS7	P00533	EGFR_HUMAN	Homo Sapiens	2.7.10.1	A	ARG817:A	841	0.921	1		120/120	A,R
2GS7	P00533	EGFR_HUMAN	Homo Sapiens	2.7.10.1	A	ASN818:A	842	1	1		120/120	N
2GS7	P00533	EGFR_HUMAN	Homo Sapiens	2.7.10.1	A	ILE917:A	941	0.028		1	120/120	S,T,N,K,Y,E,V,Q,M,L,A,P,H,D,R,I,G
2GS7	P00533	EGFR_HUMAN	Homo Sapiens	2.7.10.1	A	TYR920:A	944	0.587		1	120/120	A,S,F,T,W,Y,H,Q,R
2GS7	P00533	EGFR_HUMAN	Homo Sapiens	2.7.10.1	A	MET921:A	945	0.101		1	120/120	S,T,N,K,Y,E,V,Q,M,C,L,A,H,D,R,I,G
2GS7	P00533	EGFR_HUMAN	Homo Sapiens	2.7.10.1	A	ARG924:A	948	0.095		1	120/120	A,S,T,K,E,Y,V,Q,M,C,I,R,L
2GS7	P00533	EGFR_HUMAN	Homo Sapiens	2.7.10.1	A	MET928:A	952	0.277		1	120/120	S,A,N,K,E,V,H,Q,M,D,R,L
2HIM	P0A962	ASPG1_ECOLI	Escherichia coli	3.5.1.1	A	THR14:A	14	0.984	1		153/155	T,K
2HIM	P0A962	ASPG1_ECOLI	Escherichia coli	3.5.1.1	A	THR91:A	91	0.984	1		155/155	S,T
2HIM	P0A962	ASPG1_ECOLI	Escherichia coli	3.5.1.1	A	ASP92:A	92	0.995	1		155/155	D
2HIM	P0A962	ASPG1_ECOLI	Escherichia coli	3.5.1.1	A	ALA162:A	162	0.519		1	155/155	A,S,T,K,E,V,Q,M,C,I,R
2HIM	P0A962	ASPG1_ECOLI	Escherichia coli	3.5.1.1	A	LYS163:A	163	0.989	1		155/155	K
2HIM	P0A962	ASPG1_ECOLI	Escherichia coli	3.5.1.1	A	ARG240:A	240	0.754		1	155/155	S,A,Q,K,R,L,E
2HIM	P0A962	ASPG1_ECOLI	Escherichia coli	3.5.1.1	A	THR271:A	271	0.846		1	155/155	A,S,T
2HIM	P0A962	ASPG1_ECOLI	Escherichia coli	3.5.1.1	A	CYS273:A	273	0.774		1	155/155	A,S,T,C,P,I,V
2HIM	P0A962	ASPG1_ECOLI	Escherichia coli	3.5.1.1	A	LEU289:A	289	0.788	1		155/155	A,M,D,I,L,V
2HIM	P0A962	ASPG1_ECOLI	Escherichia coli	3.5.1.1	A	VAL302:A	302	0.421		1	155/155	F,S,A,T,K,P,V,Q,D,I,G,L
2HIM	P0A962	ASPG1_ECOLI	Escherichia coli	3.5.1.1	A	GLU303:A	303	0.928		1	155/155	A,Q,P,G,E
2I80	Q5HEB7	DDL_STAAC	Arabidopsis thaliana	6.3.2.4	A	GLU16:A	16	0.998	1	1	252/252	E
2I80	Q5HEB7	DDL_STAAC	Arabidopsis thaliana	6.3.2.4	A	VAL19:A	19	0.872		1	108/252	I,V
2I80	Q5HEB7	DDL_STAAC	Arabidopsis thaliana	6.3.2.4	A	PHE92:A	92	0.761		1	252/252	F,W,E,Y,V,M,I,L
2I80	Q5HEB7	DDL_STAAC	Arabidopsis thaliana	6.3.2.4	A	LEU94:A	94	0.739		1	252/252	S,F,A,T,N,V,H,Q,M,C,I,G,L
2I80	Q5HEB7	DDL_STAAC	Arabidopsis thaliana	6.3.2.4	A	HIS96:A	96	0.97		1	252/252	H,S,G
2I80	Q5HEB7	DDL_STAAC	Arabidopsis thaliana	6.3.2.4	A	VAL117:A	117	0.839		1	252/252	F,A,S,T,N,V,Q,M,I,G,L
2I80	Q5HEB7	DDL_STAAC	Arabidopsis thaliana	6.3.2.4	A	SER183:A	183	0.967	1		252/252	S,A,G
2I80	Q5HEB7	DDL_STAAC	Arabidopsis thaliana	6.3.2.4	A	LEU289:A	289	0.611		1	252/252	S,F,A,W,P,Y,E,V,M,C,I,G,L
2I80	Q5HEB7	DDL_STAAC	Arabidopsis thaliana	6.3.2.4	A	ARG291:A	291	0.998	1		252/252	N,R
2I80	Q5HEB7	DDL_STAAC	Arabidopsis thaliana	6.3.2.4	A	MET310:A	310	0.778		1	252/252	F,A,S,T,N,V,H,Q,M,C,R,I,L
2I80	Q5HEB7	DDL_STAAC	Arabidopsis thaliana	6.3.2.4	A	PRO311:A	311	0.914		1	252/252	A,S,T,M,C,P,L,V
2I80	Q5HEB7	DDL_STAAC	Arabidopsis thaliana	6.3.2.4	A	GLY312:A	312	0.956	1		252/252	A,S,T,G
2I80	Q5HEB7	DDL_STAAC	Arabidopsis thaliana	6.3.2.4	A	PHE313:A	313	0.945		1	252/252	S,F,M,R,L
2I80	Q5HEB7	DDL_STAAC	Arabidopsis thaliana	6.3.2.4	A	LEU337:A	337	0.591		1	241/252	F,S,A,T,V,M,C,I,L
2ONB	P04818	TYSY_HUMAN	Homo Sapiens	2.1.1.45	A	GLU87:A	87	0.968	1		134/134	D,E
2ONB	P04818	TYSY_HUMAN	Homo Sapiens	2.1.1.45	A	ASN183:A	175	0.888		1	134/134	A,H,Q,D,N,I,R
2ONB	P04818	TYSY_HUMAN	Homo Sapiens	2.1.1.45	A	ARG185:A	183	0.276		1	134/134	A,S,T,N,K,P,E,V,Q,C,D,R,I,G,L
2ONB	P04818	TYSY_HUMAN	Homo Sapiens	2.1.1.45	A	SER216:A	216	0.988	1		134/134	S,C
2ONB	P04818	TYSY_HUMAN	Homo Sapiens	2.1.1.45	A	ASP218:A	218	0.997	1		134/134	D
2ONB	P04818	TYSY_HUMAN	Homo Sapiens	2.1.1.45	A	ASN226:A	226	0.984	1		134/134	D,N
2ONB	P04818	TYSY_HUMAN	Homo Sapiens	2.1.1.45	A	ASP254:A	254	0.869	1		134/134	S,T,D,N,V
2ONB	P04818	TYSY_HUMAN	Homo Sapiens	2.1.1.45	A	HIS256:A	256	1	1		134/134	H
2ONB	P04818	TYSY_HUMAN	Homo Sapiens	2.1.1.45	A	TYR258:A	258	0.978		1	134/134	Y
2Q5O	P51852	DCIP_AZOBR	Azospirillum brasilense	4.1.1.74	A	ARG60:A	60	0.915		1	87/89	H,F,Q,R,K,L,Y
2Q5O	P51852	DCIP_AZOBR	Azospirillum brasilense	4.1.1.74	A	ARG214:A	214	0.36		1	88/89	A,S,T,W,N,K,V,D,R,I,G,L
2Q5O	P51852	DCIP_AZOBR	Azospirillum brasilense	4.1.1.74	A	ARG215:A	215	0.208		1	74/89	S,T,N,K,Y,V,Q,M,L,A,W,P,H,D,I,R,G
2Q5O	P51852	DCIP_AZOBR	Azospirillum brasilense	4.1.1.74	A	MET238:A	238	0.614		1	89/89	F,A,S,N,P,K,E,H,Q,M,R,L
2Q5O	P51852	DCIP_AZOBR	Azospirillum brasilense	4.1.1.74	A	ARG240:A	240	0.752		1	89/89	A,F,S,W,N,P,K,Q,I,R,G,L
2Q5O	P51852	DCIP_AZOBR	Azospirillum brasilense	4.1.1.74	A	MET380:A	380	0.94	1		89/89	A,S,Q,T,M,I,G,V
2Q5O	P51852	DCIP_AZOBR	Azospirillum brasilense	4.1.1.74	A	LEU395:A	395	0.243		1	89/89	F,A,W,Y,V,H,I,R,G,L
2Q5O	P51852	DCIP_AZOBR	Azospirillum brasilense	4.1.1.74	A	MET396:A	396	0.543		1	89/89	F,E,Y,V,H,M,R,I,L
2Q5O	P51852	DCIP_AZOBR	Azospirillum brasilense	4.1.1.74	A	ALA397:A	397	0.573		1	88/89	F,A,S,T,N,K,Y,V,D,C,I,G,L
2Q5O	P51852	DCIP_AZOBR	Azospirillum brasilense	4.1.1.74	A	ALA402:A	402	0.926	1		89/89	A,S,Q,N,G,L
2Q5O	P51852	DCIP_AZOBR	Azospirillum brasilense	4.1.1.74	A	MET404:A	404	0.961	1		88/89	T,M,C,I,L,V
2R1R	P00452	RIR1_ECOLI	Escherichia coli	1.17.4.1	A	LYS9:A	9	0.528		1	31/58	A,S,N,K,P,Q,D,R
2R1R	P00452	RIR1_ECOLI	Escherichia coli	1.17.4.1	A	THR55:A	55	0.716		1	34/58	S,T,N,K,E,H,R,I,G
2R1R	P00452	RIR1_ECOLI	Escherichia coli	1.17.4.1	A	LYS91:A	91	0.71		1	27/58	Q,D,K,L,E
2R1R	P00452	RIR1_ECOLI	Escherichia coli	1.17.4.1	A	CYS225:A	225	0.956	1		54/58	T,C,V
2R1R	P00452	RIR1_ECOLI	Escherichia coli	1.17.4.1	A	ASP232:A	232	0.862		1	57/58	S,F,A,T,D,I,R
2R1R	P00452	RIR1_ECOLI	Escherichia coli	1.17.4.1	A	LEU234:A	234	0.633		1	58/58	S,T,N,E,V,M,R,I,L
2R1R	P00452	RIR1_ECOLI	Escherichia coli	1.17.4.1	A	SER249:A	249	0.718		1	58/58	S,F,A,T,K,V,Q,C,R,G,L
2R1R	P00452	RIR1_ECOLI	Escherichia coli	1.17.4.1	A	ARG262:A	262	0.933		1	58/58	S,A,N,H,Q,D,R,G
2R1R	P00452	RIR1_ECOLI	Escherichia coli	1.17.4.1	A	ILE268:A	268	0.95		1	48/58	A,I,Y,L,V
2R1R	P00452	RIR1_ECOLI	Escherichia coli	1.17.4.1	A	HIS275:A	275	0.845		1	53/58	H,S,A,T,K,P,V
2R1R	P00452	RIR1_ECOLI	Escherichia coli	1.17.4.1	A	PHE281:A	281	0.439		1	57/58	F,A,W,Y,V,M,C,I,L
2R1R	P00452	RIR1_ECOLI	Escherichia coli	1.17.4.1	A	CYS292:A	292	0.724		1	58/58	S,A,F,H,C,I,K,V
2R1R	P00452	RIR1_ECOLI	Escherichia coli	1.17.4.1	A	ASN437:A	437	0.997	1		58/58	N,P,G
2R1R	P00452	RIR1_ECOLI	Escherichia coli	1.17.4.1	A	CYS439:A	439	0.969	1		58/58	F,S,C
2R1R	P00452	RIR1_ECOLI	Escherichia coli	1.17.4.1	A	GLU441:A	441	0.983	1		58/58	S,D,E
2VD4	P43889	GLMU_HAEIN	Haemophilus influenzae	2.7.7.23	A	ARG18:A	18	0.983	1		157/157	R
2VD4	P43889	GLMU_HAEIN	Haemophilus influenzae	2.7.7.23	A	LEU133:A	133	0.343		1	157/157	A,F,T,K,P,V,Q,M,I,L
2VD4	P43889	GLMU_HAEIN	Haemophilus influenzae	2.7.7.23	A	TYR139:A	139	0.737		1	157/157	M,L,Y
2VD4	P43889	GLMU_HAEIN	Haemophilus influenzae	2.7.7.23	A	THR170:A	170	0.765		1	157/157	S,A,T,P,V
2VD4	P43889	GLMU_HAEIN	Haemophilus influenzae	2.7.7.23	A	VAL220:A	220	0.084		1	157/157	S,F,A,T,N,K,P,Y,E,V,Q,M,D,C,I,G,L
2VD4	P43889	GLMU_HAEIN	Haemophilus influenzae	2.7.7.23	A	MET221:A	221	0.163		1	157/157	A,S,F,W,T,N,Y,E,V,H,Q,M,D,I,R,G,L
2VD4	P43889	GLMU_HAEIN	Haemophilus influenzae	2.7.7.23	A	GLU224:A	224	0.291		1	157/157	A,S,T,N,E,Y,V,H,Q,M,D,I,L
2VD4	P43889	GLMU_HAEIN	Haemophilus influenzae	2.7.7.23	A	ASN228:A	228	0.735		1	157/157	S,T,D,N
2VD4	P43889	GLMU_HAEIN	Haemophilus influenzae	2.7.7.23	A	GLN231:A	231	0.794		1	157/157	A,Q,M,D,E
2VD4	P43889	GLMU_HAEIN	Haemophilus influenzae	2.7.7.23	A	LEU235:A	235	0.704		1	157/157	A,C,I,R,L,V
2VD4	P43889	GLMU_HAEIN	Haemophilus influenzae	2.7.7.23	A	ASN386:A	386	0.998	1		157/157	N
2VGI	P30613	KPYR_HUMAN	Homo Sapiens	2.7.1.40	A	ARG116:A	116	0.987	1		72/73	R
2VGI	P30613	KPYR_HUMAN	Homo Sapiens	2.7.1.40	A	ARG163:A	163	0.923	1		73/73	H,I,R
2VGI	P30613	KPYR_HUMAN	Homo Sapiens	2.7.1.40	A	LYS313:A	313	0.966	1		73/73	K
2VGI	P30613	KPYR_HUMAN	Homo Sapiens	2.7.1.40	A	THR371:A	371	0.963	1		73/73	S,T
2VGI	P30613	KPYR_HUMAN	Homo Sapiens	2.7.1.40	A	SER405:A	405	0.94	1		73/73	S,T
2VGI	P30613	KPYR_HUMAN	Homo Sapiens	2.7.1.40	A	GLU407:A	407	0.972	1		73/73	E
2VGI	P30613	KPYR_HUMAN	Homo Sapiens	2.7.1.40	A	THR475:A	475	0.892		1	73/73	S,T
2VGI	P30613	KPYR_HUMAN	Homo Sapiens	2.7.1.40	A	THR476:A	476	0.302		1	73/73	S,T,N,K,Y,E,V,H,Q,M,I,R,L
2VGI	P30613	KPYR_HUMAN	Homo Sapiens	2.7.1.40	A	THR477:A	477	0.667		1	73/73	S,T,D,N,K,G
2VGI	P30613	KPYR_HUMAN	Homo Sapiens	2.7.1.40	A	GLY478:A	478	0.898		1	73/73	I,G,L
2VGI	P30613	KPYR_HUMAN	Homo Sapiens	2.7.1.40	A	ARG479:A	479	0.289		1	73/73	A,F,S,T,N,K,Y,E,H,D,R,G
2VGI	P30613	KPYR_HUMAN	Homo Sapiens	2.7.1.40	A	ARG532:A	532	0.384		1	70/73	F,A,S,T,N,M,R,I,G,L
2VGI	P30613	KPYR_HUMAN	Homo Sapiens	2.7.1.40	A	GLY557:A	557	0.858		1	64/73	A,R,G
2VGI	P30613	KPYR_HUMAN	Homo Sapiens	2.7.1.40	A	TRP558:A	558	0.192		1	60/73	F,A,S,T,W,N,V,H,D,I,G
2VGI	P30613	KPYR_HUMAN	Homo Sapiens	2.7.1.40	A	ARG559:A	559	0.407		1	62/73	A,S,T,K,P,V,H,Q,I,R,L
2VGI	P30613	KPYR_HUMAN	Homo Sapiens	2.7.1.40	A	PRO560:A	560	0.116		1	61/73	A,F,S,T,K,P,E,Y,V,H,Q,M,I,R,G
2VGI	P30613	KPYR_HUMAN	Homo Sapiens	2.7.1.40	A	GLY561:A	561	0.38		1	60/73	A,S,F,T,N,P,K,E,V,G
2VGI	P30613	KPYR_HUMAN	Homo Sapiens	2.7.1.40	A	SER562:A	562	0.141		1	65/73	S,A,F,T,K,P,E,V,Q,M,R,I,L
2VGI	P30613	KPYR_HUMAN	Homo Sapiens	2.7.1.40	A	GLY563:A	563	0.758		1	65/73	Q,T,K,R,G,E
2VGI	P30613	KPYR_HUMAN	Homo Sapiens	2.7.1.40	A	TYR564:A	564	0.268		1	64/73	F,A,S,T,W,N,K,Y,E,H,Q,D,R,G
2VGI	P30613	KPYR_HUMAN	Homo Sapiens	2.7.1.40	A	THR565:A	565	0.885		1	64/73	A,S,T,P
2VGI	P30613	KPYR_HUMAN	Homo Sapiens	2.7.1.40	A	ASN566:A	566	0.898		1	64/73	S,D,N,I
2VK1	P06169	PDC1_YEAST	Saccharomyces cerevisiae	4.1.1.1	A	ALA28:A	28	0.963	1		169/171	A,S,D,I,G,E
2VK1	P06169	PDC1_YEAST	Saccharomyces cerevisiae	4.1.1.1	A	HIS92:A	92	0.602		1	170/171	S,F,A,N,K,E,H,Q,D,C,R,G
2VK1	P06169	PDC1_YEAST	Saccharomyces cerevisiae	4.1.1.1	A	LEU112:A	112	0.856		1	170/171	F,A,N,P,Y,V,H,I,G,L
2VK1	P06169	PDC1_YEAST	Saccharomyces cerevisiae	4.1.1.1	A	LEU113:A	113	0.981		1	170/171	Q,I,E,L,V
2VK1	P06169	PDC1_YEAST	Saccharomyces cerevisiae	4.1.1.1	A	HIS114:A	114	0.935	1	1	170/171	S,H,A,Q,T,D,E
2VK1	P06169	PDC1_YEAST	Saccharomyces cerevisiae	4.1.1.1	A	HIS115:A	115	0.785	1	1	170/171	A,F,T,V,H,M,C,I,L
2VK1	P06169	PDC1_YEAST	Saccharomyces cerevisiae	4.1.1.1	A	CYS221:A	221	0.568		1	169/171	A,S,N,K,E,V,Q,M,C,D,I,R,G,L
2VK1	P06169	PDC1_YEAST	Saccharomyces cerevisiae	4.1.1.1	A	HIS225:A	225	0.499		1	100/171	S,F,A,T,N,P,E,Y,H,Q,M,R,G,L
2VK1	P06169	PDC1_YEAST	Saccharomyces cerevisiae	4.1.1.1	A	GLY286:A	286	0.988		1	171/171	A,G
2VK1	P06169	PDC1_YEAST	Saccharomyces cerevisiae	4.1.1.1	A	ALA287:A	287	0.588		1	170/171	S,A,T,N,P,K,Y,V,Q,C,D,R,G
2VK1	P06169	PDC1_YEAST	Saccharomyces cerevisiae	4.1.1.1	A	LEU289:A	289	0.661		1	170/171	F,K,P,Y,V,M,C,I,R,L
2VK1	P06169	PDC1_YEAST	Saccharomyces cerevisiae	4.1.1.1	A	SER290:A	290	0.812		1	170/171	A,S,T,N,P,V,D,I,G,L
2VK1	P06169	PDC1_YEAST	Saccharomyces cerevisiae	4.1.1.1	A	ASP291:A	291	0.904		1	169/171	F,A,S,W,N,P,Y,E,V,D,G
2VK1	P06169	PDC1_YEAST	Saccharomyces cerevisiae	4.1.1.1	A	HIS310:A	310	0.746		1	171/171	F,A,S,N,K,Y,E,V,H,Q,M,D,R,G,L
2VK1	P06169	PDC1_YEAST	Saccharomyces cerevisiae	4.1.1.1	A	GLY413:A	413	0.942	1		171/171	A,S,Q,N,G,L
2VK1	P06169	PDC1_YEAST	Saccharomyces cerevisiae	4.1.1.1	A	GLU477:A	477	0.801	1		170/171	A,S,F,T,N,K,Y,E,V,H,M,D,R,L
3BEO	Q9Y223	GLCNE_HUMAN	Homo Sapiens	5.1.3.14	A	GLN43:A	43	0.725		1	22/162	A,S,Y,E,H,Q,D,G
3BEO	Q9Y223	GLCNE_HUMAN	Homo Sapiens	5.1.3.14	A	HIS44:A	44	0.64		1	22/162	N,K,P,Y,V,H,Q,M,I
3BEO	Q9Y223	GLCNE_HUMAN	Homo Sapiens	5.1.3.14	A	GLN46:A	46	0.434		1	22/162	F,Q,I,G,L,E,Y,V
3BEO	Q9Y223	GLCNE_HUMAN	Homo Sapiens	5.1.3.14	A	MET47:A	47	0.573		1	22/162	N,P,E,V,H,M,C,R
3BEO	Q9Y223	GLCNE_HUMAN	Homo Sapiens	5.1.3.14	A	LYS67:A	67	0.313		1	27/162	A,W,T,K,E,Q,M,R,I,L
3BEO	Q9Y223	GLCNE_HUMAN	Homo Sapiens	5.1.3.14	A	ARG69:A	69	0.599		1	27/162	A,S,N,K,E,H,R,G,L
3BEO	Q9Y223	GLCNE_HUMAN	Homo Sapiens	5.1.3.14	A	GLN70:A	70	0.463		1	28/162	S,F,A,T,V,Q,M,D,I,G,L
3BEO	Q9Y223	GLCNE_HUMAN	Homo Sapiens	5.1.3.14	A	ASP100:A	100	0.979	1		162/162	S,N,D,P,G
3BEO	Q9Y223	GLCNE_HUMAN	Homo Sapiens	5.1.3.14	A	THR102:A	102	0.869		1	162/162	S,F,T,N,K,Y,V,M,I
3BEO	Q9Y223	GLCNE_HUMAN	Homo Sapiens	5.1.3.14	A	GLU122:A	122	0.968	1		162/162	H,M,T,N,I,L,E
3BEO	Q9Y223	GLCNE_HUMAN	Homo Sapiens	5.1.3.14	A	GLU136:A	136	0.936		1	162/162	M,C,G,L,E,Y
3BEO	Q9Y223	GLCNE_HUMAN	Homo Sapiens	5.1.3.14	A	GLU136:A	136	0.936	1		162/162	M,C,G,L,E,Y
3BEO	Q9Y223	GLCNE_HUMAN	Homo Sapiens	5.1.3.14	A	HIS209:A	209	0.976	1		162/162	H,Q,R,G,E
3BEO	Q9Y223	GLCNE_HUMAN	Homo Sapiens	5.1.3.14	A	ARG210:A	210	0.987		1	162/162	A,S,H,T,R,I,G
3BEO	Q9Y223	GLCNE_HUMAN	Homo Sapiens	5.1.3.14	A	GLU212:A	212	0.971		1	162/162	S,K,G,E,V
3BEO	Q9Y223	GLCNE_HUMAN	Homo Sapiens	5.1.3.14	A	HIS242:A	242	0.99		1	159/162	H,R,G
3CSM	P32178	CHMU_YEAST	Saccharomyces cerevisiae	5.4.99.5	A	ARG16:A	16	0.981	1		42/43	R
3CSM	P32178	CHMU_YEAST	Saccharomyces cerevisiae	5.4.99.5	A	ARG75:A	75	0.8		1	43/43	D,R,G
3CSM	P32178	CHMU_YEAST	Saccharomyces cerevisiae	5.4.99.5	A	ARG76:A	76	0.902		1	43/43	Q,R
3CSM	P32178	CHMU_YEAST	Saccharomyces cerevisiae	5.4.99.5	A	ASN138:A	138	0.487		1	42/43	F,A,D,N,G,E
3CSM	P32178	CHMU_YEAST	Saccharomyces cerevisiae	5.4.99.5	A	ASN139:A	139	0.922		1	42/43	H,N
3CSM	P32178	CHMU_YEAST	Saccharomyces cerevisiae	5.4.99.5	A	GLY141:A	141	0.73		1	42/43	A,P,G
3CSM	P32178	CHMU_YEAST	Saccharomyces cerevisiae	5.4.99.5	A	SER142:A	142	0.753		1	42/43	S,A,T,P,L,E
3CSM	P32178	CHMU_YEAST	Saccharomyces cerevisiae	5.4.99.5	A	THR145:A	145	0.302		1	42/43	S,A,M,T,C,G,L,V
3CSM	P32178	CHMU_YEAST	Saccharomyces cerevisiae	5.4.99.5	A	ARG157:A	157	0.985	1		42/43	R
3CSM	P32178	CHMU_YEAST	Saccharomyces cerevisiae	5.4.99.5	A	LYS168:A	168	0.871	1		43/43	K,L
3CSM	P32178	CHMU_YEAST	Saccharomyces cerevisiae	5.4.99.5	A	GLU246:A	246	0.765	1		41/43	Q,E
3D2P	B4RNV7 (TremblID)	B4RNV7_NEIG2	Neisseria gonorrhoeae	2.3.1.1	A	TYR17:A	17	0.702		1	166/166	H,F,W,Y
3D2P	B4RNV7 (TremblID)	B4RNV7_NEIG2	Neisseria gonorrhoeae	2.3.1.1	A	MET21:A	21	0.642		1	166/166	H,F,M,L,Y
3D2P	B4RNV7 (TremblID)	B4RNV7_NEIG2	Neisseria gonorrhoeae	2.3.1.1	A	LYS201:A	201	0.833		1	166/166	N,R,K
3D2P	B4RNV7 (TremblID)	B4RNV7_NEIG2	Neisseria gonorrhoeae	2.3.1.1	A	GLN257:A	257	0.772		1	166/166	S,T,Y,V,H,Q,M,I,L
3D2P	B4RNV7 (TremblID)	B4RNV7_NEIG2	Neisseria gonorrhoeae	2.3.1.1	A	GLU270:A	270	0.996		1	166/166	E
3D2P	B4RNV7 (TremblID)	B4RNV7_NEIG2	Neisseria gonorrhoeae	2.3.1.1	A	ASN275:A	275	0.126		1	165/166	S,A,T,N,K,E,V,H,Q,D,R,G,L
3D2P	B4RNV7 (TremblID)	B4RNV7_NEIG2	Neisseria gonorrhoeae	2.3.1.1	A	ASP334:A	334	0.785		1	27/166	D,E
3D2P	B4RNV7 (TremblID)	B4RNV7_NEIG2	Neisseria gonorrhoeae	2.3.1.1	A	GLU353:A	353	0.921	1		27/166	E
3DC2	P0A544	SERA_MYCTU	Mycobacterium tuberculosis	1.1.1.95	A	ARG233:A	232	0.999	1		111/111	R
3DC2	P0A544	SERA_MYCTU	Mycobacterium tuberculosis	1.1.1.95	A	GLY235:A	234	0.493	1		111/111	S,A,T,N,K,P,E,D,R,G
3DC2	P0A544	SERA_MYCTU	Mycobacterium tuberculosis	1.1.1.95	A	ASP257:A	256	0.995	1		111/111	D,V
3DC2	P0A544	SERA_MYCTU	Mycobacterium tuberculosis	1.1.1.95	A	GLU262:A	261	0.993	1		111/111	Q,E
3DC2	P0A544	SERA_MYCTU	Mycobacterium tuberculosis	1.1.1.95	A	HIS280:A	279	1	1		111/111	H
3DC2	P0A544	SERA_MYCTU	Mycobacterium tuberculosis	1.1.1.95	A	TYR461:A	460	0.576		1	12/111	H,F,Q,Y
3DC2	P0A544	SERA_MYCTU	Mycobacterium tuberculosis	1.1.1.95	A	ASP463:A	462	0.815		1	12/111	A,T,D
3DC2	P0A544	SERA_MYCTU	Mycobacterium tuberculosis	1.1.1.95	A	ARG464:A	463	0.266		1	12/111	Q,M,T,K,R,L
3DC2	P0A544	SERA_MYCTU	Mycobacterium tuberculosis	1.1.1.95	A	PRO465:A	464	0.607		1	12/111	A,T,P
3DC2	P0A544	SERA_MYCTU	Mycobacterium tuberculosis	1.1.1.95	A	LEU468:A	467	0.771		1	12/111	P,I,L
3DC2	P0A544	SERA_MYCTU	Mycobacterium tuberculosis	1.1.1.95	A	ASN481:A	480	0.913		1	12/111	A,N
3E3I	P45148	CAN_HAEIN	Haemophilus influenzae	4.2.1.1	A	TRP39:A	39	0.799		1	118/118	W,L
3E3I	P45148	CAN_HAEIN	Haemophilus influenzae	4.2.1.1	A	ASP44:A	44	0.974	1	1	118/118	D
3E3I	P45148	CAN_HAEIN	Haemophilus influenzae	4.2.1.1	A	ARG46:A	46	0.974	1	1	118/118	R
3E3I	P45148	CAN_HAEIN	Haemophilus influenzae	4.2.1.1	A	VAL47:A	47	0.851		1	118/118	I,L,V
3E3I	P45148	CAN_HAEIN	Haemophilus influenzae	4.2.1.1	A	ARG64:A	64	0.974		1	118/118	R
3E3I	P45148	CAN_HAEIN	Haemophilus influenzae	4.2.1.1	A	TYR181:A	181	0.812		1	118/118	F,Y
3F3V	P00523	SRC_CHICK	Gallus gallus	2.7.10.2	A	LYS295:A	295	0.962		1	129/129	K
3F3V	P00523	SRC_CHICK	Gallus gallus	2.7.10.2	A	GLU310:A	310	0.969		1	129/129	E
3F3V	P00523	SRC_CHICK	Gallus gallus	2.7.10.2	A	THR338:A	338	0.737		1	129/129	F,Q,M,T,I,L,V
3F3V	P00523	SRC_CHICK	Gallus gallus	2.7.10.2	A	TYR340:A	340	0.369		1	129/129	H,F,C,L,Y
3F3V	P00523	SRC_CHICK	Gallus gallus	2.7.10.2	A	MET341:A	341	0.779		1	129/129	A,T,Y,V,M,C,I,L
3F3V	P00523	SRC_CHICK	Gallus gallus	2.7.10.2	A	ASP386:A	386	0.986	1		129/129	D
3F3V	P00523	SRC_CHICK	Gallus gallus	2.7.10.2	A	ARG388:A	388	0.92	1		129/129	S,A,K,R
3F3V	P00523	SRC_CHICK	Gallus gallus	2.7.10.2	A	ALA390:A	390	0.885	1		129/129	H,A,P,R,L
3F3V	P00523	SRC_CHICK	Gallus gallus	2.7.10.2	A	ASN391:A	391	1	1		129/129	N
3F3V	P00523	SRC_CHICK	Gallus gallus	2.7.10.2	A	ILE392:A	392	0.625	1		129/129	C,I,L,V
3F3V	P00523	SRC_CHICK	Gallus gallus	2.7.10.2	A	ASP404:A	404	0.986		1	129/129	D
3F3V	P00523	SRC_CHICK	Gallus gallus	2.7.10.2	A	PHE405:A	405	0.944		1	129/129	F
3F3V	P00523	SRC_CHICK	Gallus gallus	2.7.10.2	A	GLY406:A	406	0.955		1	129/129	G
3H30	P68400	CSK21_HUMAN	Homo Sapiens	2.7.11.1	A	TYR39:A	39	0.757		1	156/158	F,L,Y
3H30	P68400	CSK21_HUMAN	Homo Sapiens	2.7.11.1	A	LEU41:A	41	0.37		1	157/158	S,A,N,K,P,E,V,Q,M,D,R,I,G,L
3H30	P68400	CSK21_HUMAN	Homo Sapiens	2.7.11.1	A	VAL67:A	67	0.706		1	158/158	M,I,L,V
3H30	P68400	CSK21_HUMAN	Homo Sapiens	2.7.11.1	A	VAL101:A	101	0.4		1	158/158	F,T,K,E,Y,V,Q,M,C,I,L
3H30	P68400	CSK21_HUMAN	Homo Sapiens	2.7.11.1	A	PRO104:A	104	0.13		1	107/158	S,A,T,N,K,P,Y,E,Q,M,D,R,G
3H30	P68400	CSK21_HUMAN	Homo Sapiens	2.7.11.1	A	VAL105:A	105	0.091		1	158/158	S,T,N,K,Y,E,V,Q,C,A,P,H,D,I,R,G
3H30	P68400	CSK21_HUMAN	Homo Sapiens	2.7.11.1	A	VAL112:A	112	0.781		1	158/158	S,A,I,V
3H30	P68400	CSK21_HUMAN	Homo Sapiens	2.7.11.1	A	ASP156:A	156	0.991	1		158/158	D
3H30	P68400	CSK21_HUMAN	Homo Sapiens	2.7.11.1	A	LYS158:A	158	0.934	1		158/158	R,K
3H30	P68400	CSK21_HUMAN	Homo Sapiens	2.7.11.1	A	HIS160:A	160	0.742	1		158/158	A,S,T,N,P,K,E,H,Q,G,L
3H30	P68400	CSK21_HUMAN	Homo Sapiens	2.7.11.1	A	ASN161:A	161	1	1		158/158	N
3H30	P68400	CSK21_HUMAN	Homo Sapiens	2.7.11.1	A	SER194:A	194	0.928	1		158/158	A,S,T
3I0R	Q99FA4 (TremblID)	Q99FA4_9HIV1	Human immunodeficiency virus 1	2.7.7.49	A	PRO95:A	95	0.977		1	89/90	Q,P
3I0R	Q99FA4 (TremblID)	Q99FA4_9HIV1	Human immunodeficiency virus 1	2.7.7.49	A	LEU100:A	100	0.652		1	89/90	F,I,L,V
3I0R	Q99FA4 (TremblID)	Q99FA4_9HIV1	Human immunodeficiency virus 1	2.7.7.49	A	LYS101:A	101	0.406		1	89/90	F,A,S,K,P,Y,E,V,Q,I,R,G
3I0R	Q99FA4 (TremblID)	Q99FA4_9HIV1	Human immunodeficiency virus 1	2.7.7.49	A	LYS103:A	103	0.246		1	89/90	A,S,T,N,K,H,Q,M,D,C,R,G
3I0R	Q99FA4 (TremblID)	Q99FA4_9HIV1	Human immunodeficiency virus 1	2.7.7.49	A	VAL106:A	106	0.648		1	89/90	F,M,K,I,L,Y,V
3I0R	Q99FA4 (TremblID)	Q99FA4_9HIV1	Human immunodeficiency virus 1	2.7.7.49	A	VAL179:A	179	0.059		1	85/90	F,S,T,Y,E,V,Q,M,C,D,I,L
3I0R	Q99FA4 (TremblID)	Q99FA4_9HIV1	Human immunodeficiency virus 1	2.7.7.49	A	TYR181:A	181	0.182		1	87/90	A,N,Y,V,Q,M,C,I,G,L
3I0R	Q99FA4 (TremblID)	Q99FA4_9HIV1	Human immunodeficiency virus 1	2.7.7.49	A	TYR188:A	188	0.721		1	90/90	F,W,I,Y,L,V
3I0R	Q99FA4 (TremblID)	Q99FA4_9HIV1	Human immunodeficiency virus 1	2.7.7.49	A	PHE227:A	227	0.52		1	90/90	F,A,T,W,Y,V,I,G,L
3I0R	Q99FA4 (TremblID)	Q99FA4_9HIV1	Human immunodeficiency virus 1	2.7.7.49	A	TRP229:A	229	0.771		1	90/90	F,W,Y
3I0R	Q99FA4 (TremblID)	Q99FA4_9HIV1	Human immunodeficiency virus 1	2.7.7.49	A	LEU234:A	234	0.824		1	90/90	F,I,L,V
3I0R	Q99FA4 (TremblID)	Q99FA4_9HIV1	Human immunodeficiency virus 1	2.7.7.49	A	HIS235:A	235	0.422		1	89/90	A,S,W,T,N,K,Y,E,H,Q,D,C,G
3I0R	Q99FA4 (TremblID)	Q99FA4_9HIV1	Human immunodeficiency virus 1	2.7.7.49	A	PRO236:A	236	0.609		1	90/90	N,K,P,E,H,Q,I,G
3I0R	Q99FA4 (TremblID)	Q99FA4_9HIV1	Human immunodeficiency virus 1	2.7.7.49	A	HIS539:A	539	0.936	1		79/90	H,D,I,Y,L
3JVR	O14757	CHK1_HUMAN	Homo Sapiens	2.7.11.1	A	PHE93:A	93	0.597		1	169/169	H,S,F,M,K,Y,L
3JVR	O14757	CHK1_HUMAN	Homo Sapiens	2.7.11.1	A	ILE96:A	96	0.797		1	169/169	F,M,I,L,V
3JVR	O14757	CHK1_HUMAN	Homo Sapiens	2.7.11.1	A	GLU97:A	97	0.308		1	166/169	A,S,T,K,Y,E,V,Q,M,D,C,R,I,G,L
3JVR	O14757	CHK1_HUMAN	Homo Sapiens	2.7.11.1	A	PRO98:A	98	0.045		1	168/169	S,A,T,N,P,K,E,V,H,Q,D,R,G,L
3JVR	O14757	CHK1_HUMAN	Homo Sapiens	2.7.11.1	A	ASP99:A	99	0.115		1	149/169	F,A,S,N,K,E,V,H,Q,C,D,R,G,L
3JVR	O14757	CHK1_HUMAN	Homo Sapiens	2.7.11.1	A	ILE100:A	100	0.175		1	7/169	T,I,G,E,V
3JVR	O14757	CHK1_HUMAN	Homo Sapiens	2.7.11.1	A	GLY101:A	101	0.497		1	169/169	S,A,T,P,K,E,V,D,R,G,L
3JVR	O14757	CHK1_HUMAN	Homo Sapiens	2.7.11.1	A	ASP130:A	130	0.993	1		169/169	D
3JVR	O14757	CHK1_HUMAN	Homo Sapiens	2.7.11.1	A	LYS132:A	132	0.975	1		169/169	K
3JVR	O14757	CHK1_HUMAN	Homo Sapiens	2.7.11.1	A	PRO133:A	133	0.804		1	169/169	A,T,I,P,L
3JVR	O14757	CHK1_HUMAN	Homo Sapiens	2.7.11.1	A	GLU134:A	134	0.878	1		169/169	Q,D,G,E
3JVR	O14757	CHK1_HUMAN	Homo Sapiens	2.7.11.1	A	ASN135:A	135	1	1		169/169	N
3JVR	O14757	CHK1_HUMAN	Homo Sapiens	2.7.11.1	A	THR170:A	170	0.908	1		169/169	S,T,N
3JVR	O14757	CHK1_HUMAN	Homo Sapiens	2.7.11.1	A	ALA200:A	200	0.782		1	169/169	A,F,T,E,V,M,I,L
3JVR	O14757	CHK1_HUMAN	Homo Sapiens	2.7.11.1	A	LEU206:A	206	0.693		1	169/169	S,A,T,K,P,Y,V,M,I,L
(B) Average conservation scores of catalytic, allosteric, and surface residues of 56 allosteric proteins
PDB	UniProt ID	Swiss-Prot ID		Enzyme Class	Average Conservation Score
					Catalytic Site	Allosteric Site	Surface
11BG	P00669	RNS_BOVIN	Bos taurus	3.1.27.5	0.73	0.63	0.330407
1A3W	P00549	KPYK1_YEAST	Saccharomyces cerevisiae	2.7.1.40	0.95	0.5	0.319679
1A49	P11974	KPYM_RABIT	Oryctolagus cuniculus	2.7.1.40	0.96	0.52	0.293027
1ABB	P00489	PYGM_RABIT	Oryctolagus cuniculus	2.4.1.1	0.87	0.66	0.269966
1AON	P0A6F5	CH60_ECOLI	Escherichia coli	Cpn64 chaperonin GroEL	0.94	0.63	0.365392
1CZA	P19367	HXK1_HUMAN	Homo Sapiens	2.7.1.1	0.89	0.32	0.306163
1DKR	P14193	KPRS_BACSU	Bacillus subtilis	2.7.6.1	0.97	0.54	0.36199
1EGY	Q00441	CPXJ_SACEN	Saccharopolyspora erythraea	1.14.-.-	0.9	0.42	0.416053
1EYJ	P00636	F16P1_PIG	Sus scrofa	3.1.3.11	0.92	0.55	0.321779
1FA9	P06737	PYGL_HUMAN	Homo Sapiens	2.4.1.1	0.95	0.43	0.279446
1FCJ	P0A1E3	CYSK_SALTY	Salmonella typhimurium	2.5.1.47	0.95	0.59	0.345363
1FIY	P00864	CAPP_ECOLI	Escherichia coli	4.1.1.31	0.99	0.94	0.273183
1FRZ	P0A759	NAGB_ECOLI	Escherichia coli	3.5.99.6	0.98	0.72	0.283693
1KV1	Q16539	MK14_HUMAN	Homo Sapiens	2.7.11.24	0.93	0.85	0.324692
1LDN	P00344	LDH_GEOSE	Geobacillus stearothermophilus	1.1.1.27	0.99	0.42	0.291698
1LTH	P19869	LDH2_BIFLO	Bifidobacterium longum	1.1.1.27	0.99	0.54	0.387746
1M8P	Q12650	MET3_PENCH	Penicillium chrysogenum	2.7.7.4	0.98	0.66	0.330749
1NXG	P0ABH7	CISY_ECOLI	Escherichia coli	2.3.3.1	0.98	0.31	0.341429
1PEQ	Q08698	RIR3_SALTY	Salmonella typhimurium	1.17.4.1	0.98	0.71	0.31677
1PFK	P0A796	K6PF1_ECOLI	Escherichia coli	2.7.1.11	0.93	0.41	0.294253
1PJ2	P23368	MAOM_HUMAN	Homo Sapiens	1.1.1.38	0.93	0.54	0.285148
1PSD	P0A9T0	SERA_ECOLI	Escherichia coli	1.1.1.95	1	0.3	0.367686
1Q0B	P52732	KIF11_HUMAN	Homo Sapiens	kinesin family member 11	0.89	0.396111	0.348888
1QW7	P0A434	OPD_BREDI	Brevundimonas diminuta	3.1.8.1	0.92	0.5	0.367333
1S9I	P36507	MP2K2_HUMAN	Homo Sapiens	2.7.12.2	0.96	0.7	0.390838
1S9J	Q02750	MP2K1_HUMAN	Homo Sapiens	2.7.12.2	0.95	0.67	0.423976
1SHJ	P55210	CASP7_HUMAN	Homo Sapiens	3.4.22.60	0.84	0.71	0.307775
1T48	P18031	PTN1_HUMAN	Homo Sapiens	3.1.3.48	0.9	0.45	0.310313
1T5A	P14618	KPYM_HUMAN	Homo Sapiens	2.7.1.40	0.96	0.44	0.282544
1V4S	P35557	HXK4_HUMAN	Homo Sapiens	2.7.1.2	0.94	0.6	0.282247
1W96	Q00955	ACAC_YEAST	Saccharomyces cerevisiae	6.4.1.2	0.98	0.78	0.370399
1YXD	P0A6L2	DAPA_ECOLI	Escherichia coli	4.2.1.52	0.95	0.71	0.244989
1Z8D	P11217	PYGM_HUMAN	Homo Sapiens	2.4.1.1	0.96	0.38	0.258532
2BU2	Q15119	PDK2_HUMAN	Homo Sapiens	2.7.11.2	0.97	0.74	0.388471
2C2B	Q9S7B5	THRC1_ARATH	Arabidopsis thaliana	4.2.3.1	0.89	0.52	0.361535
2CLH	P00929	TRPA_SALTY	Salmonella typhimurium	4.2.1.20	0.99	0.99	0.254447
2EWN	P06709	BIRA_ECOLI	Escherichia coli	6.3.4.15	0.95	0.49	0.303602
2FQQ	P29466	CASP1_HUMAN	Homo Sapiens	3.4.22.36	0.92	0.86	0.365431
2GS7	P00533	EGFR_HUMAN	Homo Sapiens	2.7.10.1	0.97	0.39	0.387278
2HIM	P0A962	ASPG1_ECOLI	Escherichia coli	3.5.1.1	0.95	0.71	0.285295
2I80	Q5HEB7	DDL_STAAC	Arabidopsis thaliana	6.3.2.4	0.98	0.82	0.341228
2ONB	P04818	TYSY_HUMAN	Homo Sapiens	2.1.1.45	0.97	0.71	0.369173
2Q5O	P51852	DCIP_AZOBR	Azospirillum brasilense	4.1.1.74	0.94	0.53	0.26397
2R1R	P00452	RIR1_ECOLI	Escherichia coli	1.17.4.1	0.98	0.73	0.317966
2VD4	P43889	GLMU_HAEIN	Haemophilus influenzae	2.7.7.23	0.99	0.51	0.387483
2VGI	P30613	KPYR_HUMAN	Homo Sapiens	2.7.1.40	0.96	0.52	0.295549
2VK1	P06169	PDC1_YEAST	Saccharomyces cerevisiae	4.1.1.1	0.89	0.76	0.257433
3BEO	Q9Y223	GLCNE_HUMAN	Homo Sapiens	5.1.3.14	0.96	0.71	0.297126
3CSM	P32178	CHMU_YEAST	Saccharomyces cerevisiae	5.4.99.5	0.9	0.7	0.339447
3D2P	B4RNV7 (TremblID)	B4RNV7_NEIG2	Neisseria gonorrhoeae	2.3.1.1	0.92	0.69	0.382419
3DC2	P0A544	SERA_MYCTU	Mycobacterium tuberculosis	1.1.1.95	0.9	0.66	0.359486
3E3I	P45148	CAN_HAEIN	Haemophilus influenzae	4.2.1.1	0.97	0.9	0.279076
3F3V	P00523	SRC_CHICK	Gallus gallus	2.7.10.2	0.88	0.84	0.326557
3H30	P68400	CSK21_HUMAN	Homo Sapiens	2.7.11.1	0.92	0.46	0.306375
3I0R	Q99FA4 (TremblID)	Q99FA4_9HIV1	Human immunodeficiency virus 1	2.7.7.49	0.94	0.54	0.386882
3JVR	O14757	CHK1_HUMAN	Homo Sapiens	2.7.11.1	0.95	0.48	0.3381
(C) Catalytic and allosteric site residues were defined as amino acid residues within 6A of the respective substrates.
PDB	UniProt ID	Swiss-Prot ID		Enzyme Class	Chain ID	PDB Numbering	Residue	Conservation Score	Catalytic Site	Allosteric Site	Number of aligned sequences having an amino acid/ Number of sequences	Residue variation
11BG	P00669	RNS_BOVIN	Bos taurus	3.1.27.5	A	MET13:A	39	0.586		1	141/148	H,M,I,Y,L,V
11BG	P00669	RNS_BOVIN	Bos taurus	3.1.27.5	A	ASP14:A	40	0.814		1	132/148	N,K,B,E,H,Q,D,R
11BG	P00669	RNS_BOVIN	Bos taurus	3.1.27.5	A	SER15:A	41	0.277		1	132/148	A,S,F,T,N,K,P,E,Y,V,H,M,R,G
11BG	P00669	RNS_BOVIN	Bos taurus	3.1.27.5	A	PRO19:A	45	0.358		1	110/148	F,A,S,T,N,P,Y,Q,D,L
11BG	P00669	RNS_BOVIN	Bos taurus	3.1.27.5	A	SER23:A	49	0.114		1	144/148	A,S,T,N,P,K,Y,V,H,D,R,I,G,L
11BG	P00669	RNS_BOVIN	Bos taurus	3.1.27.5	A	ASN24:A	50	0.383		1	144/148	S,F,T,N,K,E,V,Q,L,A,P,B,D,I,R,G
11BG	P00669	RNS_BOVIN	Bos taurus	3.1.27.5	A	TYR25:A	51	0.561		1	147/148	A,N,K,P,E,Y,H,Q,C,D,I,R
11BG	P00669	RNS_BOVIN	Bos taurus	3.1.27.5	A	ASN27:A	53	0.805		1	147/148	F,A,T,N,B,E,Y,D
11BG	P00669	RNS_BOVIN	Bos taurus	3.1.27.5	A	LEU28:A	54	0.041		1	147/148	S,T,N,K,E,Y,V,Z,Q,L,A,H,D,R,I,G
11BG	P00669	RNS_BOVIN	Bos taurus	3.1.27.5	A	CYS31:A	57	0.025		1	146/148	F,S,A,T,N,K,E,V,Q,M,C,D,R,I,L
11BG	P00669	RNS_BOVIN	Bos taurus	3.1.27.5	A	THR36:A	62	0.659		1	148/148	A,F,S,T,N,P,E,Y,H,Q,R,I
11BG	P00669	RNS_BOVIN	Bos taurus	3.1.27.5	A	PRO93:A	119	0.757		1	148/148	S,T,K,P,H,I,R,L
11BG	P00669	RNS_BOVIN	Bos taurus	3.1.27.5	A	ASN94:A	120	0.513		1	148/148	S,A,T,W,N,K,P,B,H,Q,M,D,R,L
11BG	P00669	RNS_BOVIN	Bos taurus	3.1.27.5	A	CYS95:A	121	0.984		1	148/148	C
11BG	P00669	RNS_BOVIN	Bos taurus	3.1.27.5	A	ALA96:A	122	0.236		1	148/148	A,S,T,N,P,K,E,Y,V,H,Q,D,R,G,L
11BG	P00669	RNS_BOVIN	Bos taurus	3.1.27.5	A	TYR97:A	123	0.944		1	148/148	C,Y
11BG	P00669	RNS_BOVIN	Bos taurus	3.1.27.5	A	LYS7:A	33	0.496	1		136/148	H,Q,W,T,N,D,R,K,G
11BG	P00669	RNS_BOVIN	Bos taurus	3.1.27.5	A	PHE8:A	34	0.846	1		140/148	F,L,Y,V
11BG	P00669	RNS_BOVIN	Bos taurus	3.1.27.5	A	GLN11:A	37	0.708	1		141/148	S,T,K,E,Z,H,Q,R,L
11BG	P00669	RNS_BOVIN	Bos taurus	3.1.27.5	A	HIS12:A	38	0.854	1		141/148	H,S,D,I,L,V
11BG	P00669	RNS_BOVIN	Bos taurus	3.1.27.5	A	LYS41:A	67	0.87	1		148/148	I,R,K,P,Y,V
11BG	P00669	RNS_BOVIN	Bos taurus	3.1.27.5	A	VAL43:A	69	0.253	1		148/148	F,S,T,K,E,V,Q,M,D,I,R,L
11BG	P00669	RNS_BOVIN	Bos taurus	3.1.27.5	A	ASN44:A	70	0.96	1		148/148	H,N,B,Y
11BG	P00669	RNS_BOVIN	Bos taurus	3.1.27.5	A	THR45:A	71	0.887	1		148/148	A,T,N,I,Y,V
11BG	P00669	RNS_BOVIN	Bos taurus	3.1.27.5	A	PHE46:A	72	0.895	1		148/148	F,I,V
11BG	P00669	RNS_BOVIN	Bos taurus	3.1.27.5	A	LYS66:A	92	0.61	1		142/148	S,N,P,K,Y,E,V,H,Q,D,G
11BG	P00669	RNS_BOVIN	Bos taurus	3.1.27.5	A	ASN67:A	93	0.667	1		120/148	S,A,T,N,K,B,Y,D,R,G,L
11BG	P00669	RNS_BOVIN	Bos taurus	3.1.27.5	A	GLN69:A	95	0.033	1		135/148	S,N,K,Y,E,V,Z,Q,C,L,A,W,H,D,I,R,G
11BG	P00669	RNS_BOVIN	Bos taurus	3.1.27.5	A	ILE81:A	107	0.651	1		148/148	M,N,I,G,Y,L,V
11BG	P00669	RNS_BOVIN	Bos taurus	3.1.27.5	A	ASP83:A	109	0.488	1		148/148	A,F,T,N,B,E,Y,V,H,Q,M,D,R,I,L
11BG	P00669	RNS_BOVIN	Bos taurus	3.1.27.5	A	ARG85:A	111	0.366	1		144/148	S,T,N,K,E,Y,V,H,Q,C,D,R,I,G,L
11BG	P00669	RNS_BOVIN	Bos taurus	3.1.27.5	A	LYS104:A	130	0.627	1		148/148	A,T,N,K,E,H,Q,M,R,G
11BG	P00669	RNS_BOVIN	Bos taurus	3.1.27.5	A	VAL118:A	144	1	1		129/148	I,V
11BG	P00669	RNS_BOVIN	Bos taurus	3.1.27.5	A	HIS119:A	145	0.952	1		128/148	H,D,N
11BG	P00669	RNS_BOVIN	Bos taurus	3.1.27.5	A	PHE120:A	146	0.244	1		137/148	F,W,X,D,N,Y,L
11BG	P00669	RNS_BOVIN	Bos taurus	3.1.27.5	A	ASP121:A	147	0.822	1		141/148	A,T,K,B,E,V,Q,D
11BG	P00669	RNS_BOVIN	Bos taurus	3.1.27.5	A	ALA122:A	148	0.342	1		136/148	A,S,T,N,K,E,Q,D,R,G
11BG	P00669	RNS_BOVIN	Bos taurus	3.1.27.5	A	SER123:A	149	0.448	1		131/148	A,S,T,X,Y,E,V,Q,R,I
11BG	P00669	RNS_BOVIN	Bos taurus	3.1.27.5	A	VAL124:A	150	0.838	1		100/148	M,I,K,L,V
1A3W	P00549	KPYK1_YEAST	Saccharomyces cerevisiae	2.7.1.40	A	THR379:A	379	0.335		1	70/73	S,A,T,W,P,E,V,Q,M,D,R,G,L
1A3W	P00549	KPYK1_YEAST	Saccharomyces cerevisiae	2.7.1.40	A	LEU401:A	401	0.339		1	73/73	A,F,W,P,Y,M,D,I,L
1A3W	P00549	KPYK1_YEAST	Saccharomyces cerevisiae	2.7.1.40	A	SER402:A	402	0.886		1	73/73	S,T
1A3W	P00549	KPYK1_YEAST	Saccharomyces cerevisiae	2.7.1.40	A	THR403:A	403	0.303		1	73/73	S,T,N,K,Y,E,V,H,Q,M,I,R,L
1A3W	P00549	KPYK1_YEAST	Saccharomyces cerevisiae	2.7.1.40	A	SER404:A	404	0.654		1	73/73	S,T,D,N,K,G
1A3W	P00549	KPYK1_YEAST	Saccharomyces cerevisiae	2.7.1.40	A	GLY405:A	405	0.89		1	73/73	I,G,L
1A3W	P00549	KPYK1_YEAST	Saccharomyces cerevisiae	2.7.1.40	A	THR406:A	406	0.285		1	73/73	A,F,S,T,N,K,Y,E,H,D,R,G
1A3W	P00549	KPYK1_YEAST	Saccharomyces cerevisiae	2.7.1.40	A	THR407:A	407	0.748		1	73/73	S,F,T,E,M,R,G,L
1A3W	P00549	KPYK1_YEAST	Saccharomyces cerevisiae	2.7.1.40	A	PRO408:A	408	0.706		1	73/73	S,A,T,P,I,V
1A3W	P00549	KPYK1_YEAST	Saccharomyces cerevisiae	2.7.1.40	A	ARG425:A	425	0.449		1	73/73	F,A,S,T,N,K,P,V,Q,R
1A3W	P00549	KPYK1_YEAST	Saccharomyces cerevisiae	2.7.1.40	A	TRP452:A	452	0.049		1	73/73	F,S,W,T,N,P,K,E,Y,H,M,D,I,G
1A3W	P00549	KPYK1_YEAST	Saccharomyces cerevisiae	2.7.1.40	A	ASP455:A	455	0.425		1	73/73	S,A,T,N,P,E,Q,D,R,G
1A3W	P00549	KPYK1_YEAST	Saccharomyces cerevisiae	2.7.1.40	A	VAL456:A	456	0.433		1	71/73	A,F,T,N,K,E,Y,V,M,I,R,G,L
1A3W	P00549	KPYK1_YEAST	Saccharomyces cerevisiae	2.7.1.40	A	ARG459:A	459	0.385		1	71/73	F,A,S,T,N,M,R,I,G,L
1A3W	P00549	KPYK1_YEAST	Saccharomyces cerevisiae	2.7.1.40	A	ILE482:A	482	0.604		1	71/73	A,F,T,E,V,M,I,L
1A3W	P00549	KPYK1_YEAST	Saccharomyces cerevisiae	2.7.1.40	A	GLN483:A	483	0.692		1	71/73	F,S,A,T,Y,H,Q,L
1A3W	P00549	KPYK1_YEAST	Saccharomyces cerevisiae	2.7.1.40	A	GLY484:A	484	0.822		1	66/73	A,R,G
1A3W	P00549	KPYK1_YEAST	Saccharomyces cerevisiae	2.7.1.40	A	PHE485:A	485	0.191		1	62/73	F,A,S,T,W,N,V,H,D,I,G
1A3W	P00549	KPYK1_YEAST	Saccharomyces cerevisiae	2.7.1.40	A	ALA489:A	489	0.149		1	65/73	S,A,F,T,K,P,E,V,Q,M,R,I,L
1A3W	P00549	KPYK1_YEAST	Saccharomyces cerevisiae	2.7.1.40	A	GLY490:A	490	0.746		1	65/73	Q,T,K,R,G,E
1A3W	P00549	KPYK1_YEAST	Saccharomyces cerevisiae	2.7.1.40	A	HIS491:A	491	0.273		1	64/73	F,A,S,T,W,N,K,Y,E,H,Q,D,R,G
1A3W	P00549	KPYK1_YEAST	Saccharomyces cerevisiae	2.7.1.40	A	SER492:A	492	0.88		1	64/73	A,S,T,P
1A3W	P00549	KPYK1_YEAST	Saccharomyces cerevisiae	2.7.1.40	A	ARG49:A	49	0.976	1		72/73	R
1A3W	P00549	KPYK1_YEAST	Saccharomyces cerevisiae	2.7.1.40	A	ASN51:A	51	0.994	1		72/73	N
1A3W	P00549	KPYK1_YEAST	Saccharomyces cerevisiae	2.7.1.40	A	SER53:A	53	0.906	1		72/73	S,A,C
1A3W	P00549	KPYK1_YEAST	Saccharomyces cerevisiae	2.7.1.40	A	ASP84:A	84	0.986	1		73/73	D
1A3W	P00549	KPYK1_YEAST	Saccharomyces cerevisiae	2.7.1.40	A	THR85:A	85	0.904	1		73/73	T,I,L
1A3W	P00549	KPYK1_YEAST	Saccharomyces cerevisiae	2.7.1.40	A	GLU89:A	89	0.838	1		73/73	S,K,R,E
1A3W	P00549	KPYK1_YEAST	Saccharomyces cerevisiae	2.7.1.40	A	ARG91:A	91	0.92	1		73/73	H,I,R
1A3W	P00549	KPYK1_YEAST	Saccharomyces cerevisiae	2.7.1.40	A	SER213:A	213	1	1		73/73	S
1A3W	P00549	KPYK1_YEAST	Saccharomyces cerevisiae	2.7.1.40	A	PHE214:A	214	0.916	1		73/73	F,L
1A3W	P00549	KPYK1_YEAST	Saccharomyces cerevisiae	2.7.1.40	A	LYS240:A	240	0.964	1		73/73	K
1A3W	P00549	KPYK1_YEAST	Saccharomyces cerevisiae	2.7.1.40	A	ILE241:A	241	0.91	1		73/73	I,L,V
1A3W	P00549	KPYK1_YEAST	Saccharomyces cerevisiae	2.7.1.40	A	GLU242:A	242	0.97	1		73/73	E
1A3W	P00549	KPYK1_YEAST	Saccharomyces cerevisiae	2.7.1.40	A	MET261:A	261	0.928	1		73/73	M,I,V
1A3W	P00549	KPYK1_YEAST	Saccharomyces cerevisiae	2.7.1.40	A	VAL262:A	262	0.858	1		73/73	I,V
1A3W	P00549	KPYK1_YEAST	Saccharomyces cerevisiae	2.7.1.40	A	ALA263:A	263	0.992	1		73/73	A
1A3W	P00549	KPYK1_YEAST	Saccharomyces cerevisiae	2.7.1.40	A	ARG264:A	264	0.976	1		73/73	R
1A3W	P00549	KPYK1_YEAST	Saccharomyces cerevisiae	2.7.1.40	A	GLY265:A	265	0.954	1		73/73	G
1A3W	P00549	KPYK1_YEAST	Saccharomyces cerevisiae	2.7.1.40	A	ASP266:A	266	0.986	1		73/73	D
1A3W	P00549	KPYK1_YEAST	Saccharomyces cerevisiae	2.7.1.40	A	LEU267:A	267	0.868	1		73/73	M,L
1A3W	P00549	KPYK1_YEAST	Saccharomyces cerevisiae	2.7.1.40	A	ALA297:A	297	0.992	1		73/73	A
1A3W	P00549	KPYK1_YEAST	Saccharomyces cerevisiae	2.7.1.40	A	THR298:A	298	0.96	1		73/73	S,T
1A3W	P00549	KPYK1_YEAST	Saccharomyces cerevisiae	2.7.1.40	A	MET330:A	330	0.926	1		73/73	M,W,L
1A3W	P00549	KPYK1_YEAST	Saccharomyces cerevisiae	2.7.1.40	A	SER332:A	332	0.936	1		73/73	S,T
1A49	P11974	KPYM_RABIT	Oryctolagus cuniculus	2.7.1.40	A	THR49:A	50	0.999	1		72/73	T
1A49	P11974	KPYM_RABIT	Oryctolagus cuniculus	2.7.1.40	A	ILE50:A	51	0.666	1		72/73	M,C,I,L,V
1A49	P11974	KPYM_RABIT	Oryctolagus cuniculus	2.7.1.40	A	GLY51:A	52	0.925	1		72/73	S,G
1A49	P11974	KPYM_RABIT	Oryctolagus cuniculus	2.7.1.40	A	PRO52:A	53	0.927	1		72/73	D,P
1A49	P11974	KPYM_RABIT	Oryctolagus cuniculus	2.7.1.40	A	ARG72:A	73	0.978	1		72/73	R
1A49	P11974	KPYM_RABIT	Oryctolagus cuniculus	2.7.1.40	A	ASN74:A	75	0.995	1		72/73	N
1A49	P11974	KPYM_RABIT	Oryctolagus cuniculus	2.7.1.40	A	SER76:A	77	0.912	1		72/73	S,A,C
1A49	P11974	KPYM_RABIT	Oryctolagus cuniculus	2.7.1.40	A	HIS77:A	78	0.989	1		72/73	H
1A49	P11974	KPYM_RABIT	Oryctolagus cuniculus	2.7.1.40	A	GLY78:A	79	0.798	1		72/73	A,Q,G,L
1A49	P11974	KPYM_RABIT	Oryctolagus cuniculus	2.7.1.40	A	TYR82:A	83	0.435	1		72/73	F,A,S,W,T,K,Y,E,Q,D
1A49	P11974	KPYM_RABIT	Oryctolagus cuniculus	2.7.1.40	A	HIS83:A	84	0.802	1		72/73	H,Q,T,W,C,L,V
1A49	P11974	KPYM_RABIT	Oryctolagus cuniculus	2.7.1.40	A	THR86:A	87	0.45	1		72/73	F,S,A,T,N,K,V,M,R,I
1A49	P11974	KPYM_RABIT	Oryctolagus cuniculus	2.7.1.40	A	ASP112:A	113	0.987	1		73/73	D
1A49	P11974	KPYM_RABIT	Oryctolagus cuniculus	2.7.1.40	A	THR113:A	114	0.91	1		73/73	T,I,L
1A49	P11974	KPYM_RABIT	Oryctolagus cuniculus	2.7.1.40	A	GLU117:A	118	0.845	1		73/73	S,K,R,E
1A49	P11974	KPYM_RABIT	Oryctolagus cuniculus	2.7.1.40	A	ARG119:A	120	0.925	1		73/73	H,I,R
1A49	P11974	KPYM_RABIT	Oryctolagus cuniculus	2.7.1.40	A	GLY127:A	128	0.433	1		8/73	P,G
1A49	P11974	KPYM_RABIT	Oryctolagus cuniculus	2.7.1.40	A	THR128:A	129	0.539	1		8/73	T,E
1A49	P11974	KPYM_RABIT	Oryctolagus cuniculus	2.7.1.40	A	ASP176:A	177	0.853	1		73/73	A,S,N,D,L
1A49	P11974	KPYM_RABIT	Oryctolagus cuniculus	2.7.1.40	A	ASP177:A	178	0.944	1		73/73	D,G
1A49	P11974	KPYM_RABIT	Oryctolagus cuniculus	2.7.1.40	A	GLY203:A	204	0.473	1		73/73	A,S,F,T,C,K,R,G,L
1A49	P11974	KPYM_RABIT	Oryctolagus cuniculus	2.7.1.40	A	SER204:A	205	0.552	1		73/73	S,T,N,K,P,E,H,D,G
1A49	P11974	KPYM_RABIT	Oryctolagus cuniculus	2.7.1.40	A	LYS205:A	206	0.547	1		73/73	H,Q,N,K,R,G
1A49	P11974	KPYM_RABIT	Oryctolagus cuniculus	2.7.1.40	A	LYS206:A	207	0.825	1		73/73	A,S,M,R,K
1A49	P11974	KPYM_RABIT	Oryctolagus cuniculus	2.7.1.40	A	GLY207:A	208	0.734	1		73/73	H,S,A,N,R,G
1A49	P11974	KPYM_RABIT	Oryctolagus cuniculus	2.7.1.40	A	SER242:A	243	1	1		73/73	S
1A49	P11974	KPYM_RABIT	Oryctolagus cuniculus	2.7.1.40	A	LYS269:A	270	0.966	1		73/73	K
1A49	P11974	KPYM_RABIT	Oryctolagus cuniculus	2.7.1.40	A	GLU271:A	272	0.972	1		73/73	E
1A49	P11974	KPYM_RABIT	Oryctolagus cuniculus	2.7.1.40	A	ASP295:A	296	0.987	1		73/73	D
1A49	P11974	KPYM_RABIT	Oryctolagus cuniculus	2.7.1.40	A	THR327:A	328	0.963	1		73/73	S,T
1A49	P11974	KPYM_RABIT	Oryctolagus cuniculus	2.7.1.40	A	MET359:A	360	0.931	1		73/73	M,W,L
1A49	P11974	KPYM_RABIT	Oryctolagus cuniculus	2.7.1.40	A	SER361:A	362	0.94	1		73/73	S,T
1A49	P11974	KPYM_RABIT	Oryctolagus cuniculus	2.7.1.40	A	GLY362:A	363	0.751	1		73/73	A,N,G,E
1A49	P11974	KPYM_RABIT	Oryctolagus cuniculus	2.7.1.40	A	ALA365:A	366	0.917	1		73/73	S,A,T
1A49	P11974	KPYM_RABIT	Oryctolagus cuniculus	2.7.1.40	A	LYS366:A	367	0.535	1		73/73	A,S,T,N,K,Y,V,H,M,I
1ABB	P00489	PYGM_RABIT	Oryctolagus cuniculus	2.4.1.1	A	TYR90:A	91	0.865	1		157/158	Y,L
1ABB	P00489	PYGM_RABIT	Oryctolagus cuniculus	2.4.1.1	A	ASN133:A	134	0.997	1		157/158	N
1ABB	P00489	PYGM_RABIT	Oryctolagus cuniculus	2.4.1.1	A	GLY134:A	135	0.929	1		157/158	G
1ABB	P00489	PYGM_RABIT	Oryctolagus cuniculus	2.4.1.1	A	GLY135:A	136	0.861	1		157/158	D,G
1ABB	P00489	PYGM_RABIT	Oryctolagus cuniculus	2.4.1.1	A	LEU136:A	137	0.935	1		157/158	L
1ABB	P00489	PYGM_RABIT	Oryctolagus cuniculus	2.4.1.1	A	ARG138:A	139	0.959	1		157/158	R
1ABB	P00489	PYGM_RABIT	Oryctolagus cuniculus	2.4.1.1	A	ILE486:A	487	0.614	1		158/158	I,V
1ABB	P00489	PYGM_RABIT	Oryctolagus cuniculus	2.4.1.1	A	LEU492:A	493	0.493	1		158/158	M,I,L,V
1ABB	P00489	PYGM_RABIT	Oryctolagus cuniculus	2.4.1.1	A	VAL567:A	568	0.639	1		157/158	F,T,I,V
1ABB	P00489	PYGM_RABIT	Oryctolagus cuniculus	2.4.1.1	A	LYS568:A	569	0.946	1		157/158	K
1ABB	P00489	PYGM_RABIT	Oryctolagus cuniculus	2.4.1.1	A	ARG569:A	570	0.959	1		157/158	R
1ABB	P00489	PYGM_RABIT	Oryctolagus cuniculus	2.4.1.1	A	TYR573:A	574	0.907	1		157/158	Y
1ABB	P00489	PYGM_RABIT	Oryctolagus cuniculus	2.4.1.1	A	LYS574:A	575	0.946	1		157/158	K
1ABB	P00489	PYGM_RABIT	Oryctolagus cuniculus	2.4.1.1	A	TYR648:A	649	0.721	1		158/158	F,L,Y
1ABB	P00489	PYGM_RABIT	Oryctolagus cuniculus	2.4.1.1	A	ARG649:A	650	0.608	1		158/158	S,Q,C,N,R,G,E
1ABB	P00489	PYGM_RABIT	Oryctolagus cuniculus	2.4.1.1	A	VAL650:A	651	0.847	1		158/158	A,I,V
1ABB	P00489	PYGM_RABIT	Oryctolagus cuniculus	2.4.1.1	A	SER651:A	652	0.767	1		158/158	S,Q,T,K
1ABB	P00489	PYGM_RABIT	Oryctolagus cuniculus	2.4.1.1	A	ALA653:A	654	0.789	1		158/158	S,A,M,G
1ABB	P00489	PYGM_RABIT	Oryctolagus cuniculus	2.4.1.1	A	ILE657:A	658	0.507	1		158/158	F,A,S,T,Y,V,M,C,I
1ABB	P00489	PYGM_RABIT	Oryctolagus cuniculus	2.4.1.1	A	GLN665:A	666	0.865	1		158/158	H,Q
1ABB	P00489	PYGM_RABIT	Oryctolagus cuniculus	2.4.1.1	A	GLU672:A	673	0.952	1		158/158	E
1ABB	P00489	PYGM_RABIT	Oryctolagus cuniculus	2.4.1.1	A	SER674:A	675	1	1		158/158	S
1ABB	P00489	PYGM_RABIT	Oryctolagus cuniculus	2.4.1.1	A	GLY675:A	676	0.929	1		158/158	G
1ABB	P00489	PYGM_RABIT	Oryctolagus cuniculus	2.4.1.1	A	THR676:A	677	0.997	1		158/158	T
1ABB	P00489	PYGM_RABIT	Oryctolagus cuniculus	2.4.1.1	A	GLY677:A	678	0.813	1		158/158	S,G
1ABB	P00489	PYGM_RABIT	Oryctolagus cuniculus	2.4.1.1	A	ASN678:A	679	0.997	1		158/158	N
1ABB	P00489	PYGM_RABIT	Oryctolagus cuniculus	2.4.1.1	A	LYS680:A	681	0.946	1		158/158	K
1AON	P0A6F5	CH60_ECOLI	Escherichia coli	Cpn60 chaperonin GroEL	A	THR30:A	30	0.995	1		151/151	T
1AON	P0A6F5	CH60_ECOLI	Escherichia coli	Cpn60 chaperonin GroEL	A	LEU31:A	31	0.566	1		151/151	M,I,L
1AON	P0A6F5	CH60_ECOLI	Escherichia coli	Cpn60 chaperonin GroEL	A	GLY32:A	32	0.777	1		151/151	A,G
1AON	P0A6F5	CH60_ECOLI	Escherichia coli	Cpn60 chaperonin GroEL	A	PRO33:A	33	0.925	1		151/151	P
1AON	P0A6F5	CH60_ECOLI	Escherichia coli	Cpn60 chaperonin GroEL	A	LYS51:A	51	0.717	1		151/151	N,K
1AON	P0A6F5	CH60_ECOLI	Escherichia coli	Cpn60 chaperonin GroEL	A	ASP52:A	52	0.955	1		151/151	D
1AON	P0A6F5	CH60_ECOLI	Escherichia coli	Cpn60 chaperonin GroEL	A	GLY53:A	53	0.911	1		151/151	G
1AON	P0A6F5	CH60_ECOLI	Escherichia coli	Cpn60 chaperonin GroEL	A	ASP87:A	87	0.955	1		151/151	D
1AON	P0A6F5	CH60_ECOLI	Escherichia coli	Cpn60 chaperonin GroEL	A	GLY88:A	88	0.911	1		151/151	G
1AON	P0A6F5	CH60_ECOLI	Escherichia coli	Cpn60 chaperonin GroEL	A	THR89:A	89	0.995	1		151/151	T
1AON	P0A6F5	CH60_ECOLI	Escherichia coli	Cpn60 chaperonin GroEL	A	THR90:A	90	0.995	1		151/151	T
1AON	P0A6F5	CH60_ECOLI	Escherichia coli	Cpn60 chaperonin GroEL	A	THR91:A	91	0.995	1		151/151	T
1AON	P0A6F5	CH60_ECOLI	Escherichia coli	Cpn60 chaperonin GroEL	A	ALA92:A	92	0.854	1		151/151	S,A
1AON	P0A6F5	CH60_ECOLI	Escherichia coli	Cpn60 chaperonin GroEL	A	ILE150:A	150	0.671	1		151/151	I,L,V
1AON	P0A6F5	CH60_ECOLI	Escherichia coli	Cpn60 chaperonin GroEL	A	SER151:A	151	0.755	1		151/151	A,S
1AON	P0A6F5	CH60_ECOLI	Escherichia coli	Cpn60 chaperonin GroEL	A	ASN153:A	153	0.726	1		133/151	D,N,R,G
1AON	P0A6F5	CH60_ECOLI	Escherichia coli	Cpn60 chaperonin GroEL	A	SER154:A	154	0.323	1		146/151	S,A,N,G
1AON	P0A6F5	CH60_ECOLI	Escherichia coli	Cpn60 chaperonin GroEL	A	ASP398:A	398	0.834	1		151/151	A,D
1AON	P0A6F5	CH60_ECOLI	Escherichia coli	Cpn60 chaperonin GroEL	A	ALA413:A	413	0.246	1		151/151	S,A,P,V
1AON	P0A6F5	CH60_ECOLI	Escherichia coli	Cpn60 chaperonin GroEL	A	GLY414:A	414	0.911	1		151/151	G
1AON	P0A6F5	CH60_ECOLI	Escherichia coli	Cpn60 chaperonin GroEL	A	GLY415:A	415	0.911	1		151/151	G
1AON	P0A6F5	CH60_ECOLI	Escherichia coli	Cpn60 chaperonin GroEL	A	GLY416:A	416	0.911	1		151/151	G
1AON	P0A6F5	CH60_ECOLI	Escherichia coli	Cpn60 chaperonin GroEL	A	ILE454:A	454	0.995	1		151/151	I
1AON	P0A6F5	CH60_ECOLI	Escherichia coli	Cpn60 chaperonin GroEL	A	TYR478:A	478	0.242	1		151/151	F,W,Y
1AON	P0A6F5	CH60_ECOLI	Escherichia coli	Cpn60 chaperonin GroEL	A	ASN479:A	479	0.535	1		151/151	D,N,K
1AON	P0A6F5	CH60_ECOLI	Escherichia coli	Cpn60 chaperonin GroEL	A	ALA480:A	480	0.801	1		151/151	S,A,T
1AON	P0A6F5	CH60_ECOLI	Escherichia coli	Cpn60 chaperonin GroEL	A	ALA481:A	481	0.215	1		151/151	S,A,T,E,Y,V,Q,D,R,G,L
1AON	P0A6F5	CH60_ECOLI	Escherichia coli	Cpn60 chaperonin GroEL	A	THR482:A	482	0.228	1		151/151	A,S,T,N,K,E,D,R
1AON	P0A6F5	CH60_ECOLI	Escherichia coli	Cpn60 chaperonin GroEL	A	MET488:A	488	0.425	1		151/151	M,L
1AON	P0A6F5	CH60_ECOLI	Escherichia coli	Cpn60 chaperonin GroEL	A	ILE493:A	493	0.548	1		151/151	I,V
1AON	P0A6F5	CH60_ECOLI	Escherichia coli	Cpn60 chaperonin GroEL	A	LEU494:A	494	0.416	1		151/151	I,L,V
1AON	P0A6F5	CH60_ECOLI	Escherichia coli	Cpn60 chaperonin GroEL	A	ASP495:A	495	0.955	1		151/151	D
1CZA	P19367	HXK1_HUMAN	Homo Sapiens	2.7.1.1	N	VAL19:N	19	0.071		1	21/23	H,S,A,I,L,V
1CZA	P19367	HXK1_HUMAN	Homo Sapiens	2.7.1.1	N	ASP23:N	23	0.415		1	21/23	A,Q,D,E
1CZA	P19367	HXK1_HUMAN	Homo Sapiens	2.7.1.1	N	MET29:N	29	0.701		1	23/23	F,M
1CZA	P19367	HXK1_HUMAN	Homo Sapiens	2.7.1.1	N	ARG30:N	30	0.396		1	23/23	H,R,K,E
1CZA	P19367	HXK1_HUMAN	Homo Sapiens	2.7.1.1	N	LEU31:N	31	0.279		1	23/23	F,L,Y,V
1CZA	P19367	HXK1_HUMAN	Homo Sapiens	2.7.1.1	N	SER32:N	32	0.682		1	23/23	S,T
1CZA	P19367	HXK1_HUMAN	Homo Sapiens	2.7.1.1	N	HIS373:N	373	0.304		1	22/23	H,C,R,Y
1CZA	P19367	HXK1_HUMAN	Homo Sapiens	2.7.1.1	N	THR376:N	376	0.136		1	22/23	S,A,Q,T,M,V
1CZA	P19367	HXK1_HUMAN	Homo Sapiens	2.7.1.1	N	ILE377:N	377	0.662		1	22/23	A,I
1CZA	P19367	HXK1_HUMAN	Homo Sapiens	2.7.1.1	N	VAL378:N	378	0.949		1	22/23	V
1CZA	P19367	HXK1_HUMAN	Homo Sapiens	2.7.1.1	N	PHE380:N	380	0.416		1	22/23	F,T
1CZA	P19367	HXK1_HUMAN	Homo Sapiens	2.7.1.1	N	ARG381:N	381	0.909		1	22/23	R
1CZA	P19367	HXK1_HUMAN	Homo Sapiens	2.7.1.1	N	ASN384:N	384	0.313		1	22/23	H,S,Q,N
1CZA	P19367	HXK1_HUMAN	Homo Sapiens	2.7.1.1	N	GLN422:N	422	0.211		1	22/23	H,Q,K,R,E,V
1CZA	P19367	HXK1_HUMAN	Homo Sapiens	2.7.1.1	N	ARG425:N	425	0.101		1	22/23	S,C,K,R,E
1CZA	P19367	HXK1_HUMAN	Homo Sapiens	2.7.1.1	N	ARG426:N	426	0.355		1	22/23	R,I,V
1CZA	P19367	HXK1_HUMAN	Homo Sapiens	2.7.1.1	N	LYS429:N	429	0.28		1	21/23	S,K,G,E
1CZA	P19367	HXK1_HUMAN	Homo Sapiens	2.7.1.1	N	ASP532:N	532	0.913	1		22/23	D
1CZA	P19367	HXK1_HUMAN	Homo Sapiens	2.7.1.1	N	LEU533:N	533	0.829	1		22/23	L
1CZA	P19367	HXK1_HUMAN	Homo Sapiens	2.7.1.1	N	GLY534:N	534	0.808	1		22/23	G
1CZA	P19367	HXK1_HUMAN	Homo Sapiens	2.7.1.1	N	GLY535:N	535	0.808	1		22/23	G
1CZA	P19367	HXK1_HUMAN	Homo Sapiens	2.7.1.1	N	THR536:N	536	0.967	1		22/23	T
1CZA	P19367	HXK1_HUMAN	Homo Sapiens	2.7.1.1	N	ASN537:N	537	0.958	1		22/23	N
1CZA	P19367	HXK1_HUMAN	Homo Sapiens	2.7.1.1	N	ARG539:N	539	0.909	1		22/23	R
1CZA	P19367	HXK1_HUMAN	Homo Sapiens	2.7.1.1	N	THR601:N	601	0.942	1		21/23	T
1CZA	P19367	HXK1_HUMAN	Homo Sapiens	2.7.1.1	N	PHE602:N	602	0.756	1		21/23	F
1CZA	P19367	HXK1_HUMAN	Homo Sapiens	2.7.1.1	N	SER603:N	603	0.961	1		21/23	S
1CZA	P19367	HXK1_HUMAN	Homo Sapiens	2.7.1.1	N	PHE604:N	604	0.756	1		21/23	F
1CZA	P19367	HXK1_HUMAN	Homo Sapiens	2.7.1.1	N	PRO605:N	605	0.816	1		21/23	P
1CZA	P19367	HXK1_HUMAN	Homo Sapiens	2.7.1.1	N	THR620:N	620	0.942	1		21/23	T
1CZA	P19367	HXK1_HUMAN	Homo Sapiens	2.7.1.1	N	LYS621:N	621	0.843	1		21/23	K
1CZA	P19367	HXK1_HUMAN	Homo Sapiens	2.7.1.1	N	ASN656:N	656	0.932	1		21/23	N
1CZA	P19367	HXK1_HUMAN	Homo Sapiens	2.7.1.1	N	ASP657:N	657	0.894	1		21/23	D
1CZA	P19367	HXK1_HUMAN	Homo Sapiens	2.7.1.1	N	THR658:N	658	0.942	1		21/23	T
1CZA	P19367	HXK1_HUMAN	Homo Sapiens	2.7.1.1	N	THR661:N	661	0.942	1		21/23	T
1CZA	P19367	HXK1_HUMAN	Homo Sapiens	2.7.1.1	N	ILE677:N	677	0.931	1		21/23	I
1CZA	P19367	HXK1_HUMAN	Homo Sapiens	2.7.1.1	N	VAL678:N	678	0.525	1		21/23	A,V
1CZA	P19367	HXK1_HUMAN	Homo Sapiens	2.7.1.1	N	GLY679:N	679	0.772	1		21/23	G
1CZA	P19367	HXK1_HUMAN	Homo Sapiens	2.7.1.1	N	THR680:N	680	0.942	1		21/23	T
1CZA	P19367	HXK1_HUMAN	Homo Sapiens	2.7.1.1	N	GLY681:N	681	0.857	1		22/23	G
1CZA	P19367	HXK1_HUMAN	Homo Sapiens	2.7.1.1	N	SER682:N	682	0.377	1		22/23	S,T,V
1CZA	P19367	HXK1_HUMAN	Homo Sapiens	2.7.1.1	N	ASN683:N	683	0.791	1		22/23	S,N
1CZA	P19367	HXK1_HUMAN	Homo Sapiens	2.7.1.1	N	ALA684:N	684	0.624	1		22/23	A,M,V
1CZA	P19367	HXK1_HUMAN	Homo Sapiens	2.7.1.1	N	ASN706:N	706	0.693	1		22/23	N,R
1CZA	P19367	HXK1_HUMAN	Homo Sapiens	2.7.1.1	N	GLU708:N	708	0.847	1		21/23	E
1CZA	P19367	HXK1_HUMAN	Homo Sapiens	2.7.1.1	N	GLY710:N	710	0.772	1		21/23	G
1CZA	P19367	HXK1_HUMAN	Homo Sapiens	2.7.1.1	N	GLN739:N	739	0.904	1		21/23	Q
1CZA	P19367	HXK1_HUMAN	Homo Sapiens	2.7.1.1	N	GLU742:N	742	0.847	1		21/23	E
1CZA	P19367	HXK1_HUMAN	Homo Sapiens	2.7.1.1	N	ASP861:N	861	0.97	1		22/23	D
1CZA	P19367	HXK1_HUMAN	Homo Sapiens	2.7.1.1	N	GLY862:N	862	0.857	1		22/23	G
1CZA	P19367	HXK1_HUMAN	Homo Sapiens	2.7.1.1	N	THR863:N	863	0.794	1		22/23	S,T
1CZA	P19367	HXK1_HUMAN	Homo Sapiens	2.7.1.1	N	LEU864:N	864	0.862	1		22/23	L
1CZA	P19367	HXK1_HUMAN	Homo Sapiens	2.7.1.1	N	LYS866:N	866	0.677	1		22/23	K,E
1CZA	P19367	HXK1_HUMAN	Homo Sapiens	2.7.1.1	N	SER893:N	893	0.816	1		22/23	S,A
1CZA	P19367	HXK1_HUMAN	Homo Sapiens	2.7.1.1	N	ASP895:N	895	0.97	1		22/23	D
1CZA	P19367	HXK1_HUMAN	Homo Sapiens	2.7.1.1	N	GLY896:N	896	0.857	1		22/23	G
1CZA	P19367	HXK1_HUMAN	Homo Sapiens	2.7.1.1	N	SER897:N	897	0.998	1		22/23	S
1CZA	P19367	HXK1_HUMAN	Homo Sapiens	2.7.1.1	N	GLY898:N	898	0.857	1		22/23	G
1EGY	Q00441	CPXJ_SACEN	Saccharopolyspora erythraea	1.14.-.-	A	ALA74:A	74	0.04		1	193/228	S,F,A,T,N,Y,E,V,M,D,I,R,G,L
1EGY	Q00441	CPXJ_SACEN	Saccharopolyspora erythraea	1.14.-.-	A	TYR75:A	75	0.005		1	193/228	S,F,T,N,K,Y,E,V,Q,M,C,L,A,W,P,I,R,G
1EGY	Q00441	CPXJ_SACEN	Saccharopolyspora erythraea	1.14.-.-	A	PHE78:A	78	0.015		1	222/228	A,S,F,T,N,P,Y,E,V,M,R,I,G,L
1EGY	Q00441	CPXJ_SACEN	Saccharopolyspora erythraea	1.14.-.-	A	PHE86:A	86	0.411		1	19/228	F,Q,M,I,L
1EGY	Q00441	CPXJ_SACEN	Saccharopolyspora erythraea	1.14.-.-	A	ASN89:A	89	0.769		1	222/228	A,S,T,N,P,K,V,H,Q,M,D,R,G,L
1EGY	Q00441	CPXJ_SACEN	Saccharopolyspora erythraea	1.14.-.-	A	MET90:A	90	0.481		1	227/228	A,F,M,W,P,I,L,V
1EGY	Q00441	CPXJ_SACEN	Saccharopolyspora erythraea	1.14.-.-	A	GLY91:A	91	0.269		1	227/228	S,F,A,T,V,Q,M,C,I,G,L
1EGY	Q00441	CPXJ_SACEN	Saccharopolyspora erythraea	1.14.-.-	A	THR92:A	92	0.359		1	228/228	A,S,F,T,N,V,M,D,I,G,L
1EGY	Q00441	CPXJ_SACEN	Saccharopolyspora erythraea	1.14.-.-	A	ILE174:A	174	0.177		1	216/228	A,F,S,W,P,Y,V,H,C,D,I,G,L
1EGY	Q00441	CPXJ_SACEN	Saccharopolyspora erythraea	1.14.-.-	A	LEU175:A	175	0.366		1	184/228	S,F,A,T,N,K,Y,E,V,H,Q,M,D,R,I,G,L
1EGY	Q00441	CPXJ_SACEN	Saccharopolyspora erythraea	1.14.-.-	A	ARG185:A	185	0.043		1	227/228	F,S,T,N,K,E,Y,V,Q,M,C,L,A,H,D,R,I
1EGY	Q00441	CPXJ_SACEN	Saccharopolyspora erythraea	1.14.-.-	A	LEU236:A	236	0.16		1	228/228	S,F,A,T,W,N,V,H,Q,M,D,R,I,G,L
1EGY	Q00441	CPXJ_SACEN	Saccharopolyspora erythraea	1.14.-.-	A	VAL237:A	237	0.891		1	228/228	S,F,T,N,Y,V,M,D,I,G,L
1EGY	Q00441	CPXJ_SACEN	Saccharopolyspora erythraea	1.14.-.-	A	LEU240:A	240	0.264		1	228/228	S,A,F,T,N,V,H,M,D,I,G,L
1EGY	Q00441	CPXJ_SACEN	Saccharopolyspora erythraea	1.14.-.-	A	ALA241:A	241	0.921		1	228/228	A,T,P,G,E,V
1EGY	Q00441	CPXJ_SACEN	Saccharopolyspora erythraea	1.14.-.-	A	GLY242:A	242	0.976		1	228/228	A,D,G
1EGY	Q00441	CPXJ_SACEN	Saccharopolyspora erythraea	1.14.-.-	A	ALA245:A	245	0.981		1	228/228	A,S,T,P
1EGY	Q00441	CPXJ_SACEN	Saccharopolyspora erythraea	1.14.-.-	A	PRO287:A	287	0.212		1	228/228	S,A,T,N,P,E,V,I,G,L
1EGY	Q00441	CPXJ_SACEN	Saccharopolyspora erythraea	1.14.-.-	A	PRO288:A	288	0.712		1	224/228	S,A,T,P,E,H,Q,M,D,I,G
1EGY	Q00441	CPXJ_SACEN	Saccharopolyspora erythraea	1.14.-.-	A	GLU289:A	289	0.175		1	174/228	F,S,T,N,E,V,H,M,D,I,L
1EGY	Q00441	CPXJ_SACEN	Saccharopolyspora erythraea	1.14.-.-	A	THR290:A	290	0.356		1	228/228	F,S,T,N,K,Y,V,Q,M,L,A,P,D,R,I,G
1EGY	Q00441	CPXJ_SACEN	Saccharopolyspora erythraea	1.14.-.-	A	THR291:A	291	0.379		1	228/228	A,S,F,T,P,V,I,G,L
1EGY	Q00441	CPXJ_SACEN	Saccharopolyspora erythraea	1.14.-.-	A	SER343:A	343	0.889		1	224/228	A,S,T,I,P,L,V
1EGY	Q00441	CPXJ_SACEN	Saccharopolyspora erythraea	1.14.-.-	A	CYS351:A	351	0.988		1	228/228	C
1EGY	Q00441	CPXJ_SACEN	Saccharopolyspora erythraea	1.14.-.-	A	LEU391:A	391	0.03		1	220/228	S,F,T,N,K,E,V,Q,M,C,L,A,P,D,R,I,G
1EGY	Q00441	CPXJ_SACEN	Saccharopolyspora erythraea	1.14.-.-	A	LEU392:A	392	0.048		1	222/228	F,S,T,N,K,E,Y,V,Q,M,C,L,A,P,H,D,R,I
1EYJ	P00636	F16P1_PIG	Sus scrofa	3.1.3.11	A	PHE16:A	17	0.262		1	144/144	H,F,W,Y
1EYJ	P00636	F16P1_PIG	Sus scrofa	3.1.3.11	A	VAL17:A	18	0.557		1	144/144	F,M,I,L,V
1EYJ	P00636	F16P1_PIG	Sus scrofa	3.1.3.11	A	MET18:A	19	0.444		1	144/144	A,M,T,I,L,V
1EYJ	P00636	F16P1_PIG	Sus scrofa	3.1.3.11	A	GLU19:A	20	0.325		1	144/144	S,A,T,N,K,E,H,Q,D,R,L
1EYJ	P00636	F16P1_PIG	Sus scrofa	3.1.3.11	A	GLU20:A	21	0.25		1	144/144	S,T,N,K,Y,E,V,H,Q,D,R,G,L
1EYJ	P00636	F16P1_PIG	Sus scrofa	3.1.3.11	A	GLY21:A	22	0.643		1	144/144	A,T,K,E,Q,C,R,G,L
1EYJ	P00636	F16P1_PIG	Sus scrofa	3.1.3.11	A	ARG22:A	23	0.209		1	144/144	A,S,T,N,K,P,Y,E,V,H,Q,M,R,G,L
1EYJ	P00636	F16P1_PIG	Sus scrofa	3.1.3.11	A	ALA24:A	25	0.021		1	143/144	S,A,F,T,N,K,E,Y,V,H,Q,D,I,R,G,L
1EYJ	P00636	F16P1_PIG	Sus scrofa	3.1.3.11	A	ARG25:A	26	0.146		1	143/144	S,F,A,N,K,P,E,H,Q,R,G
1EYJ	P00636	F16P1_PIG	Sus scrofa	3.1.3.11	A	GLY26:A	27	0.045		1	144/144	S,T,N,K,Y,E,V,Q,C,L,A,H,D,R,I,G
1EYJ	P00636	F16P1_PIG	Sus scrofa	3.1.3.11	A	THR27:A	28	0.42		1	143/144	A,S,T,N,P,K,E,H,Q,M,D,R,G
1EYJ	P00636	F16P1_PIG	Sus scrofa	3.1.3.11	A	GLY28:A	29	0.468		1	143/144	S,A,T,N,P,G
1EYJ	P00636	F16P1_PIG	Sus scrofa	3.1.3.11	A	GLU29:A	30	0.355		1	143/144	A,S,Q,D,G,E
1EYJ	P00636	F16P1_PIG	Sus scrofa	3.1.3.11	A	MET30:A	31	0.367		1	144/144	F,M,L,V
1EYJ	P00636	F16P1_PIG	Sus scrofa	3.1.3.11	A	THR31:A	32	0.554		1	144/144	S,A,T,N,K,R,G,V
1EYJ	P00636	F16P1_PIG	Sus scrofa	3.1.3.11	A	LEU34:A	35	0.358		1	144/144	F,M,C,I,L,V
1EYJ	P00636	F16P1_PIG	Sus scrofa	3.1.3.11	A	LYS112:A	113	0.37		1	144/144	S,A,T,N,K,P,E,D,R,G
1EYJ	P00636	F16P1_PIG	Sus scrofa	3.1.3.11	A	TYR113:A	114	0.777		1	144/144	H,F,W,Y
1EYJ	P00636	F16P1_PIG	Sus scrofa	3.1.3.11	A	ARG140:A	141	0.221		1	144/144	S,T,N,K,P,E,V,H,Q,M,R
1EYJ	P00636	F16P1_PIG	Sus scrofa	3.1.3.11	A	VAL160:A	161	0.685		1	144/144	K,I,L,V
1EYJ	P00636	F16P1_PIG	Sus scrofa	3.1.3.11	A	MET177:A	178	0.402		1	144/144	A,F,W,T,V,M,I,G,L
1FA9	P06737	PYGL_HUMAN	Homo Sapiens	2.4.1.1	A	TRP67:A	68	0.508		1	158/158	H,F,W,R,P,G,Y,L
1FA9	P06737	PYGL_HUMAN	Homo Sapiens	2.4.1.1	A	ILE68:A	69	0.37		1	158/158	A,T,N,K,E,V,H,Q,M,I,R,L
1FA9	P06737	PYGL_HUMAN	Homo Sapiens	2.4.1.1	A	ARG69:A	70	0.17		1	158/158	S,A,T,N,P,K,E,V,H,Q,M,C,D,R,I
1FA9	P06737	PYGL_HUMAN	Homo Sapiens	2.4.1.1	A	GLN71:A	72	0.269		1	158/158	F,S,T,N,K,E,Y,V,Q,M,L,A,W,P,D,R,I
1FA9	P06737	PYGL_HUMAN	Homo Sapiens	2.4.1.1	A	GLN72:A	73	0.234		1	158/158	S,A,T,N,K,Y,E,V,H,Q,I,R,G,L
1FA9	P06737	PYGL_HUMAN	Homo Sapiens	2.4.1.1	A	TYR75:A	76	0.171		1	158/158	F,A,S,T,N,K,E,Y,H,Q,D,I,R,L
1FA9	P06737	PYGL_HUMAN	Homo Sapiens	2.4.1.1	A	PRO79:A	80	0.209		1	157/158	A,S,T,N,K,P,E,V,H,Q,C,R,G,L
1FA9	P06737	PYGL_HUMAN	Homo Sapiens	2.4.1.1	A	TYR155:A	156	0.294		1	158/158	F,T,W,Y,V,H,M,R,I,L
1FA9	P06737	PYGL_HUMAN	Homo Sapiens	2.4.1.1	A	ARG193:A	194	0.772		1	158/158	H,Q,N,K,R,L,V
1FA9	P06737	PYGL_HUMAN	Homo Sapiens	2.4.1.1	A	ASP227:A	228	0.972		1	158/158	D
1FA9	P06737	PYGL_HUMAN	Homo Sapiens	2.4.1.1	A	THR240:A	241	0.548		1	158/158	A,S,T,N,P,V,M,I,R,L
1FA9	P06737	PYGL_HUMAN	Homo Sapiens	2.4.1.1	A	ARG242:A	243	0.894		1	158/158	T,R
1FA9	P06737	PYGL_HUMAN	Homo Sapiens	2.4.1.1	A	ASP306:A	307	0.86		1	158/158	A,C,D
1FA9	P06737	PYGL_HUMAN	Homo Sapiens	2.4.1.1	A	ARG309:A	310	0.49		1	158/158	S,F,A,N,K,Y,E,H,Q,C,D,R,L
1FA9	P06737	PYGL_HUMAN	Homo Sapiens	2.4.1.1	A	ARG310:A	311	0.648		1	158/158	S,T,N,E,H,Q,D,R,I,L
1FA9	P06737	PYGL_HUMAN	Homo Sapiens	2.4.1.1	A	ALA313:A	314	0.152		1	158/158	S,A,T,N,K,Y,E,V,H,Q,M,D,R,G,L
1FA9	P06737	PYGL_HUMAN	Homo Sapiens	2.4.1.1	A	TYR90:A	91	0.869	1		158/158	Y,L
1FA9	P06737	PYGL_HUMAN	Homo Sapiens	2.4.1.1	A	ASN133:A	134	0.99	1		158/158	N
1FA9	P06737	PYGL_HUMAN	Homo Sapiens	2.4.1.1	A	GLY134:A	135	0.932	1		158/158	G
1FA9	P06737	PYGL_HUMAN	Homo Sapiens	2.4.1.1	A	GLY135:A	136	0.867	1		158/158	D,G
1FA9	P06737	PYGL_HUMAN	Homo Sapiens	2.4.1.1	A	LEU136:A	137	0.937	1		158/158	L
1FA9	P06737	PYGL_HUMAN	Homo Sapiens	2.4.1.1	A	ARG138:A	139	0.961	1		158/158	R
1FA9	P06737	PYGL_HUMAN	Homo Sapiens	2.4.1.1	A	ILE486:A	487	0.609	1		158/158	I,V
1FA9	P06737	PYGL_HUMAN	Homo Sapiens	2.4.1.1	A	TRP491:A	492	0.701	1		158/158	F,W
1FA9	P06737	PYGL_HUMAN	Homo Sapiens	2.4.1.1	A	VAL567:A	568	0.643	1		157/158	F,T,I,V
1FA9	P06737	PYGL_HUMAN	Homo Sapiens	2.4.1.1	A	LYS568:A	569	0.947	1		157/158	K
1FA9	P06737	PYGL_HUMAN	Homo Sapiens	2.4.1.1	A	ARG569:A	570	0.961	1		157/158	R
1FA9	P06737	PYGL_HUMAN	Homo Sapiens	2.4.1.1	A	LYS574:A	575	0.947	1		157/158	K
1FA9	P06737	PYGL_HUMAN	Homo Sapiens	2.4.1.1	A	TYR648:A	649	0.726	1		158/158	F,L,Y
1FA9	P06737	PYGL_HUMAN	Homo Sapiens	2.4.1.1	A	ARG649:A	650	0.61	1		158/158	S,Q,C,N,R,G,E
1FA9	P06737	PYGL_HUMAN	Homo Sapiens	2.4.1.1	A	VAL650:A	651	0.849	1		158/158	A,I,V
1FA9	P06737	PYGL_HUMAN	Homo Sapiens	2.4.1.1	A	SER651:A	652	0.765	1		158/158	S,Q,T,K
1FA9	P06737	PYGL_HUMAN	Homo Sapiens	2.4.1.1	A	ALA653:A	654	0.792	1		158/158	S,A,M,G
1FA9	P06737	PYGL_HUMAN	Homo Sapiens	2.4.1.1	A	ILE657:A	658	0.521	1		158/158	F,A,S,T,Y,V,M,C,I
1FA9	P06737	PYGL_HUMAN	Homo Sapiens	2.4.1.1	A	GLU672:A	673	0.953	1		158/158	E
1FA9	P06737	PYGL_HUMAN	Homo Sapiens	2.4.1.1	A	GLY675:A	676	0.932	1		158/158	G
1FA9	P06737	PYGL_HUMAN	Homo Sapiens	2.4.1.1	A	THR676:A	677	1	1		158/158	T
1FA9	P06737	PYGL_HUMAN	Homo Sapiens	2.4.1.1	A	GLY677:A	678	0.817	1		158/158	S,G
1FA9	P06737	PYGL_HUMAN	Homo Sapiens	2.4.1.1	A	ASN678:A	679	0.99	1		158/158	N
1FA9	P06737	PYGL_HUMAN	Homo Sapiens	2.4.1.1	A	LYS680:A	681	0.947	1		158/158	K
1FIY	P00864	CAPP_ECOLI	Escherichia coli	4.1.1.31	A	GLU86:A	86	0.964		1	76/78	E
1FIY	P00864	CAPP_ECOLI	Escherichia coli	4.1.1.31	A	ARG587:A	587	0.985		1	78/78	R
1FIY	P00864	CAPP_ECOLI	Escherichia coli	4.1.1.31	A	GLY588:A	588	0.943		1	78/78	G
1FIY	P00864	CAPP_ECOLI	Escherichia coli	4.1.1.31	A	PRO591:A	591	0.802		1	78/78	S,R,P,K
1FIY	P00864	CAPP_ECOLI	Escherichia coli	4.1.1.31	A	MET616:A	616	0.725		1	78/78	A,M,I,V
1FIY	P00864	CAPP_ECOLI	Escherichia coli	4.1.1.31	A	MET766:A	766	0.82		1	78/78	A,S,M,N,D,K,L
1FIY	P00864	CAPP_ECOLI	Escherichia coli	4.1.1.31	A	MET769:A	769	0.872		1	78/78	Q,M,R,L
1FIY	P00864	CAPP_ECOLI	Escherichia coli	4.1.1.31	A	LYS773:A	773	0.896		1	78/78	Q,R,K
1FIY	P00864	CAPP_ECOLI	Escherichia coli	4.1.1.31	A	MET819:A	819	0.884		1	78/78	M,L,V
1FIY	P00864	CAPP_ECOLI	Escherichia coli	4.1.1.31	A	LEU822:A	822	0.633		1	78/78	H,S,A,Q,T,N,D,L
1FIY	P00864	CAPP_ECOLI	Escherichia coli	4.1.1.31	A	ILE825:A	825	0.723		1	78/78	Q,T,N,I,G,L
1FIY	P00864	CAPP_ECOLI	Escherichia coli	4.1.1.31	A	SER828:A	828	0.73		1	78/78	F,A,S,Q,T,K,R,I,G,L
1FIY	P00864	CAPP_ECOLI	Escherichia coli	4.1.1.31	A	ILE829:A	829	0.575		1	78/78	F,M,I,L,V
1FIY	P00864	CAPP_ECOLI	Escherichia coli	4.1.1.31	A	ARG832:A	832	0.925		1	78/78	A,R
1FIY	P00864	CAPP_ECOLI	Escherichia coli	4.1.1.31	A	GLY878:A	878	0.88		1	78/78	A,G
1FIY	P00864	CAPP_ECOLI	Escherichia coli	4.1.1.31	A	MET879:A	879	0.663		1	78/78	M,L,V
1FIY	P00864	CAPP_ECOLI	Escherichia coli	4.1.1.31	A	ARG880:A	880	0.887		1	78/78	Q,R
1FIY	P00864	CAPP_ECOLI	Escherichia coli	4.1.1.31	A	ASN881:A	881	0.954		1	78/78	S,N
1FRZ	P0A759	NAGB_ECOLI	Escherichia coli	3.5.99.6	A	MET1:A	1	0.91		1	51/94	M,I,R,L
1FRZ	P0A759	NAGB_ECOLI	Escherichia coli	3.5.99.6	A	ARG2:A	2	0.608		1	63/94	S,Q,T,N,D,P,R,K,E
1FRZ	P0A759	NAGB_ECOLI	Escherichia coli	3.5.99.6	A	HIS232:A	232	0.672		1	88/94	F,A,S,T,N,K,P,E,H,Q,M,D,R,G,L
1FRZ	P0A759	NAGB_ECOLI	Escherichia coli	3.5.99.6	A	PRO233:A	233	0.185		1	88/94	F,A,S,T,N,K,P,E,V,Q,D,R,G,L
1FRZ	P0A759	NAGB_ECOLI	Escherichia coli	3.5.99.6	A	ALA235:A	235	0.521		1	88/94	S,A,F,T,N,V,C,I,G,L
1FRZ	P0A759	NAGB_ECOLI	Escherichia coli	3.5.99.6	A	LEU258:A	258	0.687		1	15/94	M,I,L
1FRZ	P0A759	NAGB_ECOLI	Escherichia coli	3.5.99.6	A	GLU259:A	259	0.857		1	13/94	E
1KV1	Q16539	MK14_HUMAN	Homo Sapiens	2.7.11.24	A	VAL38:A	38	0.959		1	165/167	I,V
1KV1	Q16539	MK14_HUMAN	Homo Sapiens	2.7.11.24	A	ALA51:A	51	1		1	165/167	A
1KV1	Q16539	MK14_HUMAN	Homo Sapiens	2.7.11.24	A	VAL52:A	52	0.75		1	165/167	M,I,L,V
1KV1	Q16539	MK14_HUMAN	Homo Sapiens	2.7.11.24	A	LYS53:A	53	0.967		1	165/167	K
1KV1	Q16539	MK14_HUMAN	Homo Sapiens	2.7.11.24	A	ARG70:A	70	0.989		1	165/167	R
1KV1	Q16539	MK14_HUMAN	Homo Sapiens	2.7.11.24	A	GLU71:A	71	0.975		1	165/167	E
1KV1	Q16539	MK14_HUMAN	Homo Sapiens	2.7.11.24	A	LEU74:A	74	0.783		1	166/167	I,L,V
1KV1	Q16539	MK14_HUMAN	Homo Sapiens	2.7.11.24	A	LEU75:A	75	0.833		1	166/167	F,M,I,L
1KV1	Q16539	MK14_HUMAN	Homo Sapiens	2.7.11.24	A	MET78:A	78	0.549		1	167/167	F,M,I,L,V
1KV1	Q16539	MK14_HUMAN	Homo Sapiens	2.7.11.24	A	VAL83:A	83	0.663		1	167/167	C,I,L,V
1KV1	Q16539	MK14_HUMAN	Homo Sapiens	2.7.11.24	A	ILE84:A	84	0.806		1	167/167	M,T,I,L,V
1KV1	Q16539	MK14_HUMAN	Homo Sapiens	2.7.11.24	A	LEU104:A	104	0.519		1	167/167	S,F,M,I,L,V
1KV1	Q16539	MK14_HUMAN	Homo Sapiens	2.7.11.24	A	THR106:A	106	0.633		1	167/167	S,F,T,N,Y,E,Q,M,L
1KV1	Q16539	MK14_HUMAN	Homo Sapiens	2.7.11.24	A	ILE141:A	141	0.605		1	167/167	S,M,C,I,L,V
1KV1	Q16539	MK14_HUMAN	Homo Sapiens	2.7.11.24	A	ILE146:A	146	0.739		1	167/167	F,I,V
1KV1	Q16539	MK14_HUMAN	Homo Sapiens	2.7.11.24	A	ILE147:A	147	0.611		1	167/167	F,I,Y,L,V
1KV1	Q16539	MK14_HUMAN	Homo Sapiens	2.7.11.24	A	HIS148:A	148	0.995		1	167/167	H
1KV1	Q16539	MK14_HUMAN	Homo Sapiens	2.7.11.24	A	LEU167:A	167	0.753			167/167	A,T,C,G,L
1KV1	Q16539	MK14_HUMAN	Homo Sapiens	2.7.11.24	A	ASP168:A	168	0.95			167/167	D,G
1KV1	Q16539	MK14_HUMAN	Homo Sapiens	2.7.11.24	A	PHE169:A	169	0.845			167/167	F,L
1LDN	P00344	LDH_GEOSE	Geobacillus stearothermophilus	1.1.1.27	A	ARG171:A	157	0.686		1	148/148	S,A,Q,N,K,R,E
1LDN	P00344	LDH_GEOSE	Geobacillus stearothermophilus	1.1.1.27	A	PRO182:A	168	0.283		1	148/148	S,A,T,K,P,V,M,D,I
1LDN	P00344	LDH_GEOSE	Geobacillus stearothermophilus	1.1.1.27	A	GLN183:A	169	0.147		1	148/148	S,A,T,N,K,E,H,Q,D,R,L
1LDN	P00344	LDH_GEOSE	Geobacillus stearothermophilus	1.1.1.27	A	ASN184:A	170	0.699		1	148/148	H,A,S,N,D,E
1LDN	P00344	LDH_GEOSE	Geobacillus stearothermophilus	1.1.1.27	A	VAL185:A	171	0.531		1	147/148	A,F,C,I,L,V
1LDN	P00344	LDH_GEOSE	Geobacillus stearothermophilus	1.1.1.27	A	HIS186:A	172	0.489		1	147/148	S,T,N,K,E,V,H,Q,D,R
1LDN	P00344	LDH_GEOSE	Geobacillus stearothermophilus	1.1.1.27	A	ALA187:A	173	0.702		1	147/148	S,A,T,G,V
1LDN	P00344	LDH_GEOSE	Geobacillus stearothermophilus	1.1.1.27	A	TYR188:A	174	0.331		1	147/148	S,F,W,T,N,Y,V,H,Q,M,C,R,I,L
1LDN	P00344	LDH_GEOSE	Geobacillus stearothermophilus	1.1.1.27	A	GLY207:A	193	0.416		1	148/148	A,S,M,C,N,K,G
1LDN	P00344	LDH_GEOSE	Geobacillus stearothermophilus	1.1.1.27	A	VAL208:A	194	0.737		1	148/148	M,T,N,I,G,V
1LDN	P00344	LDH_GEOSE	Geobacillus stearothermophilus	1.1.1.27	A	ILE269:A	255	0.442		1	148/148	A,T,M,C,I,L,V
1LDN	P00344	LDH_GEOSE	Geobacillus stearothermophilus	1.1.1.27	A	LEU270:A	256	0.664		1	148/148	F,A,T,V,H,Q,M,I,L
1LDN	P00344	LDH_GEOSE	Geobacillus stearothermophilus	1.1.1.27	A	ASN99:A	85	0.397	1		148/148	A,T,N,K,R,P,G
1LDN	P00344	LDH_GEOSE	Geobacillus stearothermophilus	1.1.1.27	A	GLN100:A	86	0.864	1		148/148	H,Q,M,P,R
1LDN	P00344	LDH_GEOSE	Geobacillus stearothermophilus	1.1.1.27	A	ARG106:A	92	0.991	1		148/148	R
1LDN	P00344	LDH_GEOSE	Geobacillus stearothermophilus	1.1.1.27	A	ASN138:A	124	0.997	1		148/148	N
1LDN	P00344	LDH_GEOSE	Geobacillus stearothermophilus	1.1.1.27	A	LEU165:A	151	0.962	1		148/148	L
1LDN	P00344	LDH_GEOSE	Geobacillus stearothermophilus	1.1.1.27	A	ASP166:A	152	0.991	1		148/148	D
1LDN	P00344	LDH_GEOSE	Geobacillus stearothermophilus	1.1.1.27	A	ARG169:A	155	0.991	1		148/148	R
1LDN	P00344	LDH_GEOSE	Geobacillus stearothermophilus	1.1.1.27	A	HIS193:A	179	0.994	1		148/148	H
1LDN	P00344	LDH_GEOSE	Geobacillus stearothermophilus	1.1.1.27	A	ALA236:A	222	0.766	1		148/148	S,A,T,M,K,G
1LDN	P00344	LDH_GEOSE	Geobacillus stearothermophilus	1.1.1.27	A	ALA237:A	223	0.912	1		148/148	A,G
1LDN	P00344	LDH_GEOSE	Geobacillus stearothermophilus	1.1.1.27	A	ILE240:A	226	0.839	1		148/148	M,I,V
1LDN	P00344	LDH_GEOSE	Geobacillus stearothermophilus	1.1.1.27	A	ILE241:A	227	0.899	1		148/148	I,Y,L,V
1LDN	P00344	LDH_GEOSE	Geobacillus stearothermophilus	1.1.1.27	A	ALA246:A	232	0.82	1		148/148	F,A,S,T,G,Y,V
1LDN	P00344	LDH_GEOSE	Geobacillus stearothermophilus	1.1.1.27	A	THR247:A	233	0.972	1		148/148	A,T
1LDN	P00344	LDH_GEOSE	Geobacillus stearothermophilus	1.1.1.27	A	TYR248:A	234	0.378	1		148/148	A,S,H,F,T,N,Y
1LDN	P00344	LDH_GEOSE	Geobacillus stearothermophilus	1.1.1.27	A	ILE251:A	237	0.823	1		148/148	I,P,V
1LTH	P19869	LDH2_BIFLO	Bifidobacterium longum	1.1.1.27	R	ARG156:R	157	0.982	1	1	153/153	R
1LTH	P19869	LDH2_BIFLO	Bifidobacterium longum	1.1.1.27	R	VAL169:R	170	0.284		1	153/153	S,A,F,T,K,P,V,M,D,I
1LTH	P19869	LDH2_BIFLO	Bifidobacterium longum	1.1.1.27	R	LYS170:R	171	0.114		1	153/153	S,A,T,N,K,E,H,Q,D,R,L
1LTH	P19869	LDH2_BIFLO	Bifidobacterium longum	1.1.1.27	R	ASN171:R	172	0.692		1	153/153	H,A,S,N,D,E
1LTH	P19869	LDH2_BIFLO	Bifidobacterium longum	1.1.1.27	R	VAL172:R	173	0.541		1	152/153	A,F,C,I,L,V
1LTH	P19869	LDH2_BIFLO	Bifidobacterium longum	1.1.1.27	R	HIS173:R	174	0.482		1	152/153	S,T,N,K,E,V,H,Q,D,R
1LTH	P19869	LDH2_BIFLO	Bifidobacterium longum	1.1.1.27	R	ALA174:R	175	0.714		1	152/153	S,A,T,G,V
1LTH	P19869	LDH2_BIFLO	Bifidobacterium longum	1.1.1.27	R	GLY194:R	195	0.428		1	153/153	A,S,M,C,N,K,G
1LTH	P19869	LDH2_BIFLO	Bifidobacterium longum	1.1.1.27	R	ARG257:R	258	0.557		1	153/153	A,S,N,K,V,Q,R,L
1LTH	P19869	LDH2_BIFLO	Bifidobacterium longum	1.1.1.27	R	ILE258:R	259	0.431		1	153/153	A,T,M,C,I,L,V
1LTH	P19869	LDH2_BIFLO	Bifidobacterium longum	1.1.1.27	R	GLN87:R	88	0.865	1		153/153	H,Q,M,P,K,R
1LTH	P19869	LDH2_BIFLO	Bifidobacterium longum	1.1.1.27	R	ARG93:R	94	0.982	1		153/153	R
1LTH	P19869	LDH2_BIFLO	Bifidobacterium longum	1.1.1.27	R	ASN125:R	126	1	1		153/153	N
1LTH	P19869	LDH2_BIFLO	Bifidobacterium longum	1.1.1.27	R	LEU152:R	153	0.966	1		153/153	L
1LTH	P19869	LDH2_BIFLO	Bifidobacterium longum	1.1.1.27	R	ASP153:R	154	0.994	1		153/153	D
1LTH	P19869	LDH2_BIFLO	Bifidobacterium longum	1.1.1.27	R	ARG156:R	157	0.982	1	1	153/153	R
1LTH	P19869	LDH2_BIFLO	Bifidobacterium longum	1.1.1.27	R	HIS180:R	181	0.997	1		153/153	H
1LTH	P19869	LDH2_BIFLO	Bifidobacterium longum	1.1.1.27	R	ALA225:R	226	0.771	1		153/153	S,A,T,M,K,G
1LTH	P19869	LDH2_BIFLO	Bifidobacterium longum	1.1.1.27	R	ALA226:R	227	0.912	1		153/153	A,G
1LTH	P19869	LDH2_BIFLO	Bifidobacterium longum	1.1.1.27	R	ILE229:R	230	0.846	1		153/153	M,I,V
1LTH	P19869	LDH2_BIFLO	Bifidobacterium longum	1.1.1.27	R	ILE230:R	231	0.9	1		153/153	I,Y,L,V
1LTH	P19869	LDH2_BIFLO	Bifidobacterium longum	1.1.1.27	R	THR236:R	237	0.972	1		153/153	A,T
1LTH	P19869	LDH2_BIFLO	Bifidobacterium longum	1.1.1.27	R	ILE240:R	241	0.809	1		153/153	I,P,V
1M8P	Q12650	MET3_PENCH	Penicillium chrysogenum	2.7.7.4	A	MET405:A	404	0.364		1	49/177	S,A,N,P,Y,E,H,Q,M,D,R,I,L
1M8P	Q12650	MET3_PENCH	Penicillium chrysogenum	2.7.7.4	A	LYS409:A	408	0.689		1	45/177	D,R,K,G,L
1M8P	Q12650	MET3_PENCH	Penicillium chrysogenum	2.7.7.4	A	ASP410:A	409	0.523		1	45/177	A,S,N,K,E,Q,D,R,I
1M8P	Q12650	MET3_PENCH	Penicillium chrysogenum	2.7.7.4	A	GLY433:A	432	0.551		1	40/177	H,A,S,D,G
1M8P	Q12650	MET3_PENCH	Penicillium chrysogenum	2.7.7.4	A	ASP434:A	433	0.625		1	40/177	H,D,K,E
1M8P	Q12650	MET3_PENCH	Penicillium chrysogenum	2.7.7.4	A	THR435:A	434	0.364		1	40/177	Q,T,N,I,E,V
1M8P	Q12650	MET3_PENCH	Penicillium chrysogenum	2.7.7.4	A	VAL436:A	435	0.562		1	40/177	A,T,N,D,I,L,V
1M8P	Q12650	MET3_PENCH	Penicillium chrysogenum	2.7.7.4	A	ARG437:A	436	0.766		1	39/177	S,A,N,K,R
1M8P	Q12650	MET3_PENCH	Penicillium chrysogenum	2.7.7.4	A	GLY445:A	444	0.747		1	35/177	S,T,G
1M8P	Q12650	MET3_PENCH	Penicillium chrysogenum	2.7.7.4	A	PHE446:A	445	0.77		1	35/177	F,I,Y
1M8P	Q12650	MET3_PENCH	Penicillium chrysogenum	2.7.7.4	A	ASP450:A	449	0.791		1	35/177	H,Q,D
1M8P	Q12650	MET3_PENCH	Penicillium chrysogenum	2.7.7.4	A	ARG451:A	450	0.915		1	35/177	K,R
1M8P	Q12650	MET3_PENCH	Penicillium chrysogenum	2.7.7.4	A	HIS452:A	451	0.438		1	35/177	H,S,Q,T,N,D,I
1M8P	Q12650	MET3_PENCH	Penicillium chrysogenum	2.7.7.4	A	ASN454:A	453	0.983		1	35/177	N
1M8P	Q12650	MET3_PENCH	Penicillium chrysogenum	2.7.7.4	A	ILE455:A	454	0.478		1	35/177	I,L,V
1M8P	Q12650	MET3_PENCH	Penicillium chrysogenum	2.7.7.4	A	ILE458:A	457	0.89		1	35/177	Q,I,V
1M8P	Q12650	MET3_PENCH	Penicillium chrysogenum	2.7.7.4	A	ALA475:A	474	0.847		1	38/177	A,T,C,P
1M8P	Q12650	MET3_PENCH	Penicillium chrysogenum	2.7.7.4	A	PRO476:A	475	0.665		1	38/177	A,Q,T,P,L
1M8P	Q12650	MET3_PENCH	Penicillium chrysogenum	2.7.7.4	A	ILE477:A	476	0.742		1	38/177	S,T,K,I,V
1M8P	Q12650	MET3_PENCH	Penicillium chrysogenum	2.7.7.4	A	ALA478:A	477	0.855		1	38/177	S,A,N
1M8P	Q12650	MET3_PENCH	Penicillium chrysogenum	2.7.7.4	A	PRO479:A	478	0.792		1	38/177	D,N,P
1M8P	Q12650	MET3_PENCH	Penicillium chrysogenum	2.7.7.4	A	ARG515:A	514	0.579		1	36/177	D,R,K
1M8P	Q12650	MET3_PENCH	Penicillium chrysogenum	2.7.7.4	A	ILE517:A	516	0.355		1	36/177	M,N,R,I,L,V
1M8P	Q12650	MET3_PENCH	Penicillium chrysogenum	2.7.7.4	A	ILE526:A	525	0.845		1	36/177	I,L,V
1M8P	Q12650	MET3_PENCH	Penicillium chrysogenum	2.7.7.4	A	LYS527:A	526	0.57		1	36/177	T,K,P,E,L
1M8P	Q12650	MET3_PENCH	Penicillium chrysogenum	2.7.7.4	A	GLY528:A	527	0.121		1	36/177	A,Q,N,I,G,E,V
1M8P	Q12650	MET3_PENCH	Penicillium chrysogenum	2.7.7.4	A	PHE529:A	528	0.567		1	36/177	F,M,L,V
1M8P	Q12650	MET3_PENCH	Penicillium chrysogenum	2.7.7.4	A	THR530:A	529	0.946		1	36/177	T,K
1M8P	Q12650	MET3_PENCH	Penicillium chrysogenum	2.7.7.4	A	ASP534:A	533	0.801		1	37/177	F,A,D
1NXG	P0ABH7	CISY_ECOLI	Escherichia coli	2.3.3.1	A	THR106:A	107	0.219		1	65/67	A,F,T,K,E,Q,C,D,R,G
1NXG	P0ABH7	CISY_ECOLI	Escherichia coli	2.3.3.1	A	THR108:A	109	0.207		1	66/67	S,A,T,N,K,V,H,Q,M,I,R
1NXG	P0ABH7	CISY_ECOLI	Escherichia coli	2.3.3.1	A	ARG109:A	110	0.069		1	66/67	A,S,T,N,K,E,H,Q,D,I,R
1NXG	P0ABH7	CISY_ECOLI	Escherichia coli	2.3.3.1	A	HIS110:A	111	0.437		1	66/67	A,S,N,Y,E,H,R,G,L
1NXG	P0ABH7	CISY_ECOLI	Escherichia coli	2.3.3.1	A	THR111:A	112	0.54		1	66/67	A,S,T,Y,V,M,R,G
1NXG	P0ABH7	CISY_ECOLI	Escherichia coli	2.3.3.1	A	MET112:A	113	0.064		1	67/67	F,S,A,T,N,P,K,E,V,H,Q,M,D,R,I,G,L
1NXG	P0ABH7	CISY_ECOLI	Escherichia coli	2.3.3.1	A	ILE113:A	114	0.383		1	67/67	I,P,L,V
1NXG	P0ABH7	CISY_ECOLI	Escherichia coli	2.3.3.1	A	HIS114:A	115	0.658		1	67/67	S,A,N,K,P,Y,E,H,D
1NXG	P0ABH7	CISY_ECOLI	Escherichia coli	2.3.3.1	A	GLU115:A	116	0.09		1	66/67	S,A,T,K,Y,E,H,Q,D,R,I,L
1NXG	P0ABH7	CISY_ECOLI	Escherichia coli	2.3.3.1	A	ILE117:A	118	0.308		1	65/67	F,A,T,V,H,M,C,I,L
1NXG	P0ABH7	CISY_ECOLI	Escherichia coli	2.3.3.1	A	PHE144:A	145	0.172		1	64/67	F,T,N,K,Y,E,Q,D,I,G,L
1NXG	P0ABH7	CISY_ECOLI	Escherichia coli	2.3.3.1	A	TYR145:A	146	0.787		1	64/67	H,S,N,D,Y,L
1NXG	P0ABH7	CISY_ECOLI	Escherichia coli	2.3.3.1	A	ASP147:A	148	0.503		1	61/67	S,F,T,N,K,E,Y,Q,D,R
1NXG	P0ABH7	CISY_ECOLI	Escherichia coli	2.3.3.1	A	GLU158:A	159	0.127		1	67/67	A,S,F,T,K,E,Y,Q,M,D,R,L
1NXG	P0ABH7	CISY_ECOLI	Escherichia coli	2.3.3.1	A	ILE159:A	160	0.36		1	67/67	A,S,T,K,E,V,D,I,R,L
1NXG	P0ABH7	CISY_ECOLI	Escherichia coli	2.3.3.1	A	ALA160:A	161	0.346		1	67/67	A,S,T,K,E,V,Q,M,D,I,R
1NXG	P0ABH7	CISY_ECOLI	Escherichia coli	2.3.3.1	A	PHE162:A	163	0.188		1	67/67	F,A,T,Y,V,H,M,D,I,R,L
1NXG	P0ABH7	CISY_ECOLI	Escherichia coli	2.3.3.1	A	ARG163:A	164	0.559		1	67/67	S,T,N,K,E,Q,M,D,R
1NXG	P0ABH7	CISY_ECOLI	Escherichia coli	2.3.3.1	A	LYS167:A	168	0.496		1	67/67	S,Q,T,I,R,K,Y,V
1NXG	P0ABH7	CISY_ECOLI	Escherichia coli	2.3.3.1	A	PRO187:A	188	0.531		1	67/67	S,T,K,P,Y,V,I,L
1NXG	P0ABH7	CISY_ECOLI	Escherichia coli	2.3.3.1	A	ASN189:A	190	0.144		1	67/67	A,S,N,K,P,E,H,Q,M,D,R,I,G
1NXG	P0ABH7	CISY_ECOLI	Escherichia coli	2.3.3.1	A	HIS226:A	227	0.85	1		67/67	A,H,Q,Y
1NXG	P0ABH7	CISY_ECOLI	Escherichia coli	2.3.3.1	A	HIS229:A	230	0.993	1		67/67	H
1NXG	P0ABH7	CISY_ECOLI	Escherichia coli	2.3.3.1	A	GLN231:A	232	0.763	1		67/67	F,Q,M,I,G,L,V
1NXG	P0ABH7	CISY_ECOLI	Escherichia coli	2.3.3.1	A	ASN232:A	233	0.949	1		67/67	N,P
1NXG	P0ABH7	CISY_ECOLI	Escherichia coli	2.3.3.1	A	ALA233:A	234	0.918	1		67/67	A,C,N,V
1NXG	P0ABH7	CISY_ECOLI	Escherichia coli	2.3.3.1	A	SER234:A	235	1	1		67/67	S
1NXG	P0ABH7	CISY_ECOLI	Escherichia coli	2.3.3.1	A	LEU259:A	260	0.893	1		67/67	M,I,L
1NXG	P0ABH7	CISY_ECOLI	Escherichia coli	2.3.3.1	A	PRO262:A	263	0.869	1		67/67	S,H,N,P
1NXG	P0ABH7	CISY_ECOLI	Escherichia coli	2.3.3.1	A	ARG299:A	300	0.672	1		67/67	R,K,V
1NXG	P0ABH7	CISY_ECOLI	Escherichia coli	2.3.3.1	A	HIS305:A	306	0.993	1		67/67	H
1NXG	P0ABH7	CISY_ECOLI	Escherichia coli	2.3.3.1	A	ARG306:A	307	0.904	1		67/67	A,P,R,G
1NXG	P0ABH7	CISY_ECOLI	Escherichia coli	2.3.3.1	A	VAL307:A	308	0.954	1		67/67	I,V
1NXG	P0ABH7	CISY_ECOLI	Escherichia coli	2.3.3.1	A	ARG314:A	315	0.986	1		67/67	R
1NXG	P0ABH7	CISY_ECOLI	Escherichia coli	2.3.3.1	A	VAL361:A	362	0.916	1		67/67	T,I,L,V
1NXG	P0ABH7	CISY_ECOLI	Escherichia coli	2.3.3.1	A	ASP362:A	363	0.93	1		67/67	D,G,E
1NXG	P0ABH7	CISY_ECOLI	Escherichia coli	2.3.3.1	A	ARG387:A	388	0.986	1		64/67	R
1PEQ	Q08698	RIR3_SALTY	Salmonella typhimurium	1.17.4.1	A	GLU184:A	184	0.104		1	53/55	S,A,N,K,P,E,V,Q,D,G,L
1PEQ	Q08698	RIR3_SALTY	Salmonella typhimurium	1.17.4.1	A	ASP185:A	185	0.883		1	53/55	S,F,T,D,R,I
1PEQ	Q08698	RIR3_SALTY	Salmonella typhimurium	1.17.4.1	A	ASN186:A	186	0.699		1	53/55	S,T,D,N,L
1PEQ	Q08698	RIR3_SALTY	Salmonella typhimurium	1.17.4.1	A	MET187:A	187	0.538		1	53/55	S,T,N,E,V,M,R,I,L
1PEQ	Q08698	RIR3_SALTY	Salmonella typhimurium	1.17.4.1	A	GLU188:A	188	0.26		1	53/55	F,S,W,T,N,K,E,V,Q,D,G,L
1PEQ	Q08698	RIR3_SALTY	Salmonella typhimurium	1.17.4.1	A	ILE190:A	190	0.932		1	53/55	A,S,T,I,L,V
1PEQ	Q08698	RIR3_SALTY	Salmonella typhimurium	1.17.4.1	A	ASN213:A	213	0.128		1	53/55	S,A,T,N,K,Y,V,Q,M,C,D,R,G,L
1PEQ	Q08698	RIR3_SALTY	Salmonella typhimurium	1.17.4.1	A	LEU214:A	214	0.773		1	53/55	A,F,T,I,L,V
1PEQ	Q08698	RIR3_SALTY	Salmonella typhimurium	1.17.4.1	A	ARG215:A	215	0.956		1	53/55	S,D,N,R,G
1PEQ	Q08698	RIR3_SALTY	Salmonella typhimurium	1.17.4.1	A	PRO220:A	220	0.087		1	44/55	S,F,A,W,N,P,K,Y,E,V,H,L
1PEQ	Q08698	RIR3_SALTY	Salmonella typhimurium	1.17.4.1	A	ILE221:A	221	0.946		1	45/55	A,I,L,V
1PEQ	Q08698	RIR3_SALTY	Salmonella typhimurium	1.17.4.1	A	LYS222:A	222	0.479		1	45/55	A,S,T,K,H,M,C,D,R,G
1PEQ	Q08698	RIR3_SALTY	Salmonella typhimurium	1.17.4.1	A	ARG223:A	223	0.487		1	43/55	S,M,D,N,R,K,G
1PEQ	Q08698	RIR3_SALTY	Salmonella typhimurium	1.17.4.1	A	GLN227:A	227	0.252		1	51/55	A,F,T,N,K,E,Q,C,D,I,R,G,L
1PEQ	Q08698	RIR3_SALTY	Salmonella typhimurium	1.17.4.1	A	SER228:A	228	0.853		1	51/55	H,S,A,T,K,P,V
1PEQ	Q08698	RIR3_SALTY	Salmonella typhimurium	1.17.4.1	A	SER229:A	229	0.78		1	51/55	A,S,T,N,K,Q,R,G
1PEQ	Q08698	RIR3_SALTY	Salmonella typhimurium	1.17.4.1	A	GLY230:A	230	0.958		1	51/55	S,G
1PEQ	Q08698	RIR3_SALTY	Salmonella typhimurium	1.17.4.1	A	TYR312:A	312	0.259		1	55/55	S,A,T,N,K,P,Y,E,H,Q,C,D,R
1PFK	P0A796	K6PF1_ECOLI	Escherichia coli	2.7.1.11	A	ARG154:A	155	0.474		1	120/120	F,S,T,N,K,Y,E,V,Q,M,C,L,H,D,R,I,G
1PFK	P0A796	K6PF1_ECOLI	Escherichia coli	2.7.1.11	A	SER158:A	159	0.364		1	120/120	F,A,S,T,N,K,E,Y,V,H,Q,D,R,I,L
1PFK	P0A796	K6PF1_ECOLI	Escherichia coli	2.7.1.11	A	GLY184:A	185	0.348		1	120/120	A,S,T,V,C,D,I,R,G,L
1PFK	P0A796	K6PF1_ECOLI	Escherichia coli	2.7.1.11	A	GLY185:A	186	0.787		1	120/120	A,S,N,K,E,H,D,G
1PFK	P0A796	K6PF1_ECOLI	Escherichia coli	2.7.1.11	A	CYS186:A	187	0.878		1	120/120	A,S,C,P,I,G
1PFK	P0A796	K6PF1_ECOLI	Escherichia coli	2.7.1.11	A	GLU187:A	188	0.596		1	120/120	S,T,N,Y,E,V,H,Q,M,D,I,L
1PFK	P0A796	K6PF1_ECOLI	Escherichia coli	2.7.1.11	A	LYS211:A	212	0.044		1	119/120	S,T,N,K,Y,E,V,Q,M,C,L,A,W,P,H,D,R,I,G
1PFK	P0A796	K6PF1_ECOLI	Escherichia coli	2.7.1.11	A	GLY212:A	213	0.436		1	120/120	F,A,S,T,N,K,E,H,Q,D,G
1PFK	P0A796	K6PF1_ECOLI	Escherichia coli	2.7.1.11	A	LYS213:A	214	0.43		1	120/120	A,S,K,E,Y,V,H,Q,M,D,I,R,L
1PFK	P0A796	K6PF1_ECOLI	Escherichia coli	2.7.1.11	A	LYS214:A	215	0.261		1	120/120	F,S,T,N,K,E,Y,V,Q,M,L,P,H,D,R,I,G
1PFK	P0A796	K6PF1_ECOLI	Escherichia coli	2.7.1.11	A	HIS215:A	216	0.493		1	120/120	F,S,T,N,K,Y,V,Q,C,L,A,H,D,R,I,G
1PFK	P0A796	K6PF1_ECOLI	Escherichia coli	2.7.1.11	A	ALA216:A	217	0.399		1	119/120	A,S,F,T,N,P,Y,V,H,Q,C,D,I,G
1PFK	P0A796	K6PF1_ECOLI	Escherichia coli	2.7.1.11	A	LEU318:A	319	0.59		1	54/120	F,Q,M,W,I,G,L,V
1PFK	P0A796	K6PF1_ECOLI	Escherichia coli	2.7.1.11	A	TYR319:A	320	0.392		1	22/120	F,L,Y
1PFK	P0A796	K6PF1_ECOLI	Escherichia coli	2.7.1.11	A	SER9:A	10	0.822	1		119/120	S,A,T,C,I,G,V
1PFK	P0A796	K6PF1_ECOLI	Escherichia coli	2.7.1.11	A	GLY10:A	11	0.991	1		119/120	G
1PFK	P0A796	K6PF1_ECOLI	Escherichia coli	2.7.1.11	A	GLY11:A	12	0.903	1		119/120	A,S,R,G
1PFK	P0A796	K6PF1_ECOLI	Escherichia coli	2.7.1.11	A	ASP12:A	13	0.922	1		119/120	A,F,Q,D,P
1PFK	P0A796	K6PF1_ECOLI	Escherichia coli	2.7.1.11	A	ALA13:A	14	0.756	1		119/120	S,A,T,C,V
1PFK	P0A796	K6PF1_ECOLI	Escherichia coli	2.7.1.11	A	TYR41:A	42	0.515	1		120/120	F,S,T,W,P,Y,V,L
1PFK	P0A796	K6PF1_ECOLI	Escherichia coli	2.7.1.11	A	ALA71:A	72	0.806	1		120/120	A,S,Q,N,K,R,G,V
1PFK	P0A796	K6PF1_ECOLI	Escherichia coli	2.7.1.11	A	ARG72:A	73	0.866	1		120/120	H,A,T,N,K,R,G
1PFK	P0A796	K6PF1_ECOLI	Escherichia coli	2.7.1.11	A	PHE73:A	74	0.232	1		119/120	S,F,T,K,E,Y,V,H,Q,C,D,R,I,G,L
1PFK	P0A796	K6PF1_ECOLI	Escherichia coli	2.7.1.11	A	PRO74:A	75	0.107	1		119/120	S,A,T,N,P,K,E,V,H,Q,M,D,R,I,L
1PFK	P0A796	K6PF1_ECOLI	Escherichia coli	2.7.1.11	A	GLU75:A	76	0.452	1		119/120	S,A,T,N,P,K,E,Q,D,R,G,L
1PFK	P0A796	K6PF1_ECOLI	Escherichia coli	2.7.1.11	A	PHE76:A	77	0.511	1		112/120	F,S,W,T,N,K,Y,E,D,I,G,L
1PFK	P0A796	K6PF1_ECOLI	Escherichia coli	2.7.1.11	A	ARG77:A	78	0.301	1		116/120	F,A,S,T,K,P,Y,E,V,H,Q,M,D,R,G,L
1PFK	P0A796	K6PF1_ECOLI	Escherichia coli	2.7.1.11	A	ASP78:A	79	0.054	1		116/120	F,S,A,T,K,Y,E,V,H,Q,C,D,I,L
1PFK	P0A796	K6PF1_ECOLI	Escherichia coli	2.7.1.11	A	ARG82:A	83	0.49	1		120/120	A,F,T,K,V,Q,M,C,D,I,R,L
1PFK	P0A796	K6PF1_ECOLI	Escherichia coli	2.7.1.11	A	GLY101:A	102	0.963	1		120/120	C,G
1PFK	P0A796	K6PF1_ECOLI	Escherichia coli	2.7.1.11	A	GLY102:A	103	0.991	1		120/120	G
1PFK	P0A796	K6PF1_ECOLI	Escherichia coli	2.7.1.11	A	ASP103:A	104	0.825	1		120/120	S,F,Q,N,D,E,V
1PFK	P0A796	K6PF1_ECOLI	Escherichia coli	2.7.1.11	A	GLY104:A	105	0.819	1		120/120	M,T,N,D,G,E
1PFK	P0A796	K6PF1_ECOLI	Escherichia coli	2.7.1.11	A	SER105:A	106	0.888	1		120/120	A,S,T,G
1PFK	P0A796	K6PF1_ECOLI	Escherichia coli	2.7.1.11	A	TYR106:A	107	0.743	1		120/120	F,Q,M,N,L,Y
1PFK	P0A796	K6PF1_ECOLI	Escherichia coli	2.7.1.11	A	MET107:A	108	0.308	1		120/120	A,T,K,E,V,H,Q,M,D,I,R,G,L
1PFK	P0A796	K6PF1_ECOLI	Escherichia coli	2.7.1.11	A	GLY108:A	109	0.665	1		120/120	S,A,T,C,D,N,I,G,V
1PFK	P0A796	K6PF1_ECOLI	Escherichia coli	2.7.1.11	A	ALA109:A	110	0.812	1		120/120	A,M,T,I,G,L,V
1PFK	P0A796	K6PF1_ECOLI	Escherichia coli	2.7.1.11	A	ARG111:A	112	0.11	1		120/120	A,S,F,W,T,K,E,V,H,Q,M,C,D,R,I,L
1PFK	P0A796	K6PF1_ECOLI	Escherichia coli	2.7.1.11	A	GLY124:A	125	0.797	1		120/120	S,A,H,C,K,G,V
1PFK	P0A796	K6PF1_ECOLI	Escherichia coli	2.7.1.11	A	THR125:A	126	0.994	1		120/120	S,T
1PFK	P0A796	K6PF1_ECOLI	Escherichia coli	2.7.1.11	A	ILE126:A	127	0.941	1		120/120	M,I,L,V
1PFK	P0A796	K6PF1_ECOLI	Escherichia coli	2.7.1.11	A	ASP127:A	128	0.96	1		120/120	A,S,N,D
1PFK	P0A796	K6PF1_ECOLI	Escherichia coli	2.7.1.11	A	ASP129:A	130	0.997	1		120/120	N,D
1PFK	P0A796	K6PF1_ECOLI	Escherichia coli	2.7.1.11	A	MET169:A	170	1	1		120/120	Q,M
1PFK	P0A796	K6PF1_ECOLI	Escherichia coli	2.7.1.11	A	GLY170:A	171	0.991	1		120/120	G
1PFK	P0A796	K6PF1_ECOLI	Escherichia coli	2.7.1.11	A	ARG171:A	172	0.916	1		119/120	H,A,S,R,G
1PFK	P0A796	K6PF1_ECOLI	Escherichia coli	2.7.1.11	A	GLU222:A	223	0.932	1		120/120	H,D,K,R,E
1PFK	P0A796	K6PF1_ECOLI	Escherichia coli	2.7.1.11	A	HIS223:A	224	0.54	1		120/120	A,F,S,N,K,Y,H,M,D,G,L
1PFK	P0A796	K6PF1_ECOLI	Escherichia coli	2.7.1.11	A	HIS249:A	250	0.891	1		120/120	H,I,L,Y
1PFK	P0A796	K6PF1_ECOLI	Escherichia coli	2.7.1.11	A	ARG252:A	253	0.944	1		119/120	H,Q,R,L
1PJ2	P23368	MAOM_HUMAN	Homo Sapiens	1.1.1.38	A	LYS36:A	36	0.903		1	49/55	R,K
1PJ2	P23368	MAOM_HUMAN	Homo Sapiens	1.1.1.38	A	GLY37:A	37	0.757		1	49/55	D,G
1PJ2	P23368	MAOM_HUMAN	Homo Sapiens	1.1.1.38	A	-	38	0.725		1	49/55	S,M,T,L,V
1PJ2	P23368	MAOM_HUMAN	Homo Sapiens	1.1.1.38	A	GLU59:A	59	0.159		1	49/55	S,F,N,E,V,Q,M,I,L
1PJ2	P23368	MAOM_HUMAN	Homo Sapiens	1.1.1.38	A	GLN64:A	64	0.929		1	50/55	Q,E
1PJ2	P23368	MAOM_HUMAN	Homo Sapiens	1.1.1.38	A	ALA65:A	65	0.239		1	50/55	S,A,T,I,L,E,Y,V
1PJ2	P23368	MAOM_HUMAN	Homo Sapiens	1.1.1.38	A	ARG67:A	67	0.771		1	50/55	S,Q,R,K
1PJ2	P23368	MAOM_HUMAN	Homo Sapiens	1.1.1.38	A	TYR84:A	84	0.35		1	50/55	A,F,Q,I,L,Y
1PJ2	P23368	MAOM_HUMAN	Homo Sapiens	1.1.1.38	A	-	87	0.267		1	50/55	S,A,T,N,E,H,Q,D,R,G
1PJ2	P23368	MAOM_HUMAN	Homo Sapiens	1.1.1.38	A	ILE88:A	88	0.693		1	50/55	H,I,L
1PJ2	P23368	MAOM_HUMAN	Homo Sapiens	1.1.1.38	A	ARG91:A	91	0.652		1	50/55	Q,M,T,N,R,K
1PJ2	P23368	MAOM_HUMAN	Homo Sapiens	1.1.1.38	A	ASN92:A	92	0.862		1	50/55	H,D,N,I
1PJ2	P23368	MAOM_HUMAN	Homo Sapiens	1.1.1.38	A	LEU95:A	95	0.871		1	49/55	M,L
1PJ2	P23368	MAOM_HUMAN	Homo Sapiens	1.1.1.38	A	ARG165:A	165	0.81	1		55/55	S,A,R,G
1PJ2	P23368	MAOM_HUMAN	Homo Sapiens	1.1.1.38	A	LEU167:A	167	0.967	1		55/55	L
1PJ2	P23368	MAOM_HUMAN	Homo Sapiens	1.1.1.38	A	ILE179:A	179	0.919	1		55/55	I,V
1PJ2	P23368	MAOM_HUMAN	Homo Sapiens	1.1.1.38	A	LYS183:A	183	0.985	1		55/55	K
1PJ2	P23368	MAOM_HUMAN	Homo Sapiens	1.1.1.38	A	GLU255:A	255	0.988	1		55/55	E
1PJ2	P23368	MAOM_HUMAN	Homo Sapiens	1.1.1.38	A	ASP256:A	256	0.993	1		55/55	D
1PJ2	P23368	MAOM_HUMAN	Homo Sapiens	1.1.1.38	A	ASP278:A	278	0.937	1		55/55	D,V
1PJ2	P23368	MAOM_HUMAN	Homo Sapiens	1.1.1.38	A	ASP279:A	279	0.993	1		55/55	D
1PJ2	P23368	MAOM_HUMAN	Homo Sapiens	1.1.1.38	A	ASN467:A	467	0.999	1		55/55	N
1Q0B	P52732	KIF11_HUMAN	Homo Sapiens	kinesin family member 11	A	MET115:A	115	0.837		1	118/118	M,I,L,V
1Q0B	P52732	KIF11_HUMAN	Homo Sapiens	kinesin family member 11	A	GLU116:A	116	0.443		1	117/118	S,T,E,Y,V,Q,M,D,I,G,L
1Q0B	P52732	KIF11_HUMAN	Homo Sapiens	kinesin family member 11	A	GLY117:A	117	0.878		1	117/118	S,T,M,N,G,E
1Q0B	P52732	KIF11_HUMAN	Homo Sapiens	kinesin family member 11	A	GLU118:A	118	0.148		1	9/118	H,N,C,G,L,E
1Q0B	P52732	KIF11_HUMAN	Homo Sapiens	kinesin family member 11	A	ARG119:A	119	0.219		1	12/118	S,K,R,P,G,E
1Q0B	P52732	KIF11_HUMAN	Homo Sapiens	kinesin family member 11	A	SER120:A	120	0.26		1	12/118	S,T,N,D,R,P,G
1Q0B	P52732	KIF11_HUMAN	Homo Sapiens	kinesin family member 11	A	THR126:A	126	0.066		1	76/118	F,S,A,T,N,P,K,E,V,D,C,I,R,G,L
1Q0B	P52732	KIF11_HUMAN	Homo Sapiens	kinesin family member 11	A	TRP127:A	127	0.036		1	81/118	A,S,W,T,N,P,K,E,V,Q,M,D,I,R,G,L
1Q0B	P52732	KIF11_HUMAN	Homo Sapiens	kinesin family member 11	A	GLU128:A	128	0.017		1	83/118	F,A,S,T,N,E,Y,V,H,Q,D,I,G,L
1Q0B	P52732	KIF11_HUMAN	Homo Sapiens	kinesin family member 11	A	ASP130:A	130	0.14		1	113/118	F,S,A,N,K,P,Y,E,V,H,Q,M,D,R,G
1Q0B	P52732	KIF11_HUMAN	Homo Sapiens	kinesin family member 11	A	PRO131:A	131	0.022		1	114/118	A,S,W,T,N,P,K,E,V,H,Q,C,D,G
1Q0B	P52732	KIF11_HUMAN	Homo Sapiens	kinesin family member 11	A	LEU132:A	132	0.123		1	117/118	A,S,T,N,K,Y,E,H,Q,M,D,R,G,L
1Q0B	P52732	KIF11_HUMAN	Homo Sapiens	kinesin family member 11	A	ALA133:A	133	0.279		1	118/118	S,A,T,N,K,P,E,V,H,Q,M,D,I,R,G,L
1Q0B	P52732	KIF11_HUMAN	Homo Sapiens	kinesin family member 11	A	GLY134:A	134	0.987		1	118/118	G
1Q0B	P52732	KIF11_HUMAN	Homo Sapiens	kinesin family member 11	A	ILE136:A	136	0.675		1	118/118	A,T,N,Y,V,Q,M,I,L
1Q0B	P52732	KIF11_HUMAN	Homo Sapiens	kinesin family member 11	A	PRO137:A	137	0.705		1	118/118	S,F,A,P,Y,V,Q,I
1Q0B	P52732	KIF11_HUMAN	Homo Sapiens	kinesin family member 11	A	TYR211:A	211	0.143		1	118/118	S,F,T,N,K,Y,E,V,Q,M,C,L,A,H,D,I,R
1Q0B	P52732	KIF11_HUMAN	Homo Sapiens	kinesin family member 11	A	LEU214:A	214	0.574		1	118/118	F,M,I,L,V
1Q0B	P52732	KIF11_HUMAN	Homo Sapiens	kinesin family member 11	A	GLU215:A	215	0.238		1	118/118	S,F,T,N,K,E,V,Q,M,L,A,W,H,D,R,I
1Q0B	P52732	KIF11_HUMAN	Homo Sapiens	kinesin family member 11	A	ALA218:A	218	0.432		1	118/118	S,F,T,N,K,E,V,Q,M,L,A,W,H,D,I,R,G
1Q0B	P52732	KIF11_HUMAN	Homo Sapiens	kinesin family member 11	A	PHE239:A	239	0.618		1	118/118	F,T,C,I,L,V
1Q0B	P52732	KIF11_HUMAN	Homo Sapiens	kinesin family member 11	A	LYS111:A	111	0.976	1		118/118	Q,K
1Q0B	P52732	KIF11_HUMAN	Homo Sapiens	kinesin family member 11	A	THR112:A	112	0.85	1		118/118	S,A,T,D,P
1Q0B	P52732	KIF11_HUMAN	Homo Sapiens	kinesin family member 11	A	PHE113:A	113	0.487	1		118/118	F,H,Q,Y,E
1Q0B	P52732	KIF11_HUMAN	Homo Sapiens	kinesin family member 11	A	SER232:A	232	0.946	1		117/118	S,A,T,D,P,R
1Q0B	P52732	KIF11_HUMAN	Homo Sapiens	kinesin family member 11	A	ASP265:A	265	1	1		118/118	D
1QW7	P0A434	OPD_BREDI	Brevundimonas diminuta	3.1.8.1	A	GLY50:A	50	0.965		1	67/159	T,D,G
1QW7	P0A434	OPD_BREDI	Brevundimonas diminuta	3.1.8.1	A	PHE51:A	51	0.219		1	70/159	S,F,A,P,K,Y,V,H,M,C,I,R,L
1QW7	P0A434	OPD_BREDI	Brevundimonas diminuta	3.1.8.1	A	ALA93:A	93	0.21		1	155/159	S,F,A,N,K,Y,E,V,H,Q,M,C,I,R,L
1QW7	P0A434	OPD_BREDI	Brevundimonas diminuta	3.1.8.1	A	GLY94:A	94	0.824		1	155/159	A,S,N,K,E,Q,D,R,G
1QW7	P0A434	OPD_BREDI	Brevundimonas diminuta	3.1.8.1	A	VAL95:A	95	0.902		1	155/159	T,W,M,I,G,L,V
1QW7	P0A434	OPD_BREDI	Brevundimonas diminuta	3.1.8.1	A	PRO329:A	329	0.429		1	150/159	A,S,F,T,K,P,E,V,H,M,C,R,I,L
1QW7	P0A434	OPD_BREDI	Brevundimonas diminuta	3.1.8.1	A	ILE333:A	333	0.393		1	150/159	A,K,V,Q,M,C,I,R,G,L
1QW7	P0A434	OPD_BREDI	Brevundimonas diminuta	3.1.8.1	A	GLN343:A	343	0		1	148/159	F,S,T,N,K,Y,E,V,Q,M,C,L,A,P,H,D,I,R,G
1QW7	P0A434	OPD_BREDI	Brevundimonas diminuta	3.1.8.1	A	LEU346:A	346	0.363		1	148/159	A,F,M,C,I,L,V
1QW7	P0A434	OPD_BREDI	Brevundimonas diminuta	3.1.8.1	A	ALA347:A	347	0.318		1	148/159	F,S,A,W,T,N,K,E,V,H,Q,M,D,C,R,G
1QW7	P0A434	OPD_BREDI	Brevundimonas diminuta	3.1.8.1	A	THR350:A	350	0.77		1	148/159	F,W,T,H,Q,M,C,I,G,L
1QW7	P0A434	OPD_BREDI	Brevundimonas diminuta	3.1.8.1	A	VAL351:A	351	0.623		1	147/159	A,S,T,W,K,E,Y,V,H,M,R,I,G,L
1SHJ	P55210	CASP7_HUMAN	Homo Sapiens	3.4.22.60	A	GLU146:A	146	0.288		1	161/170	F,S,T,X,N,K,E,V,H,Q,M,D,I,R,G,L
1SHJ	P55210	CASP7_HUMAN	Homo Sapiens	3.4.22.60	A	GLU147:A	147	0.361		1	170/170	F,S,T,N,K,Y,E,V,Q,M,L,A,P,H,D,R,G
1SHJ	P55210	CASP7_HUMAN	Homo Sapiens	3.4.22.60	A	ASN148:A	148	0.64		1	170/170	S,A,N,K,E,H,D,R,G
1SHJ	P55210	CASP7_HUMAN	Homo Sapiens	3.4.22.60	A	VAL149:A	149	0.215		1	142/170	S,F,A,T,K,Y,E,V,H,M,C,R,I,G,L
1SHJ	P55210	CASP7_HUMAN	Homo Sapiens	3.4.22.60	A	ILE159:A	159	0.648		1	170/170	F,T,P,Y,V,D,I,R,L
1SHJ	P55210	CASP7_HUMAN	Homo Sapiens	3.4.22.60	A	LYS160:A	160	0.407		1	168/170	S,T,N,P,K,Y,E,H,Q,M,D,R,G
1SHJ	P55210	CASP7_HUMAN	Homo Sapiens	3.4.22.60	A	THR163:A	163	0.556		1	170/170	A,S,F,T,W,K,E,Y,V,Q,M,I,R,L
1SHJ	P55210	CASP7_HUMAN	Homo Sapiens	3.4.22.60	A	ILE183:A	183	0.79		1	170/170	F,W,M,C,I,L,V
1SHJ	P55210	CASP7_HUMAN	Homo Sapiens	3.4.22.60	A	ARG187:A	187	0.92		1	170/170	A,Q,R,G,V
1SHJ	P55210	CASP7_HUMAN	Homo Sapiens	3.4.22.60	A	TYR211:A	211	0.115		1	169/170	F,S,T,N,K,Y,E,V,Q,M,C,L,A,P,H,D,R,I
1SHJ	P55210	CASP7_HUMAN	Homo Sapiens	3.4.22.60	A	LYS212:A	212	0.426		1	169/170	S,F,T,N,K,Y,E,V,Q,M,C,L,A,W,H,D,R,I,G
1SHJ	P55210	CASP7_HUMAN	Homo Sapiens	3.4.22.60	A	ILE213:A	213	0.617		1	169/170	F,S,A,T,K,Y,E,V,M,R,I,G,L
1SHJ	P55210	CASP7_HUMAN	Homo Sapiens	3.4.22.60	A	PRO214:A	214	0.916		1	169/170	A,S,H,Q,T,N,P
1SHJ	P55210	CASP7_HUMAN	Homo Sapiens	3.4.22.60	A	PHE221:A	221	0.571		1	169/170	F,S,A,W,T,P,Y,V,H,M,C,I,R,L
1SHJ	P55210	CASP7_HUMAN	Homo Sapiens	3.4.22.60	A	ALA222:A	222	0.698		1	169/170	A,S,F,V,M,C,I,R,G,L
1SHJ	P55210	CASP7_HUMAN	Homo Sapiens	3.4.22.60	A	TYR223:A	223	0.587		1	169/170	F,W,N,K,E,Y,H,M,C,I,R,L
1SHJ	P55210	CASP7_HUMAN	Homo Sapiens	3.4.22.60	A	THR225:A	225	0.912		1	169/170	S,T,C,K,V
1SHJ	P55210	CASP7_HUMAN	Homo Sapiens	3.4.22.60	A	CYS290:A	290	0.633		1	161/170	A,S,T,N,K,Y,E,V,Q,M,C,I,G,L
1SHJ	P55210	CASP7_HUMAN	Homo Sapiens	3.4.22.60	A	VAL291:A	291	0.315		1	161/170	F,A,S,W,T,P,K,E,Y,V,H,Q,M,C,R,I,L
1SHJ	P55210	CASP7_HUMAN	Homo Sapiens	3.4.22.60	A	VAL292:A	292	0.476		1	161/170	F,S,T,N,K,Y,E,V,Q,M,C,L,A,W,H,D,R,I
1T5A	P14618	KPYM_HUMAN	Homo Sapiens	2.7.1.40	A	LEU431:A	431	0.327		1	73/73	A,F,W,P,Y,M,D,I,L
1T5A	P14618	KPYM_HUMAN	Homo Sapiens	2.7.1.40	A	THR432:A	432	0.902		1	73/73	S,T
1T5A	P14618	KPYM_HUMAN	Homo Sapiens	2.7.1.40	A	LYS433:A	433	0.283		1	73/73	S,T,N,K,Y,E,V,H,Q,M,I,R,L
1T5A	P14618	KPYM_HUMAN	Homo Sapiens	2.7.1.40	A	SER434:A	434	0.695		1	73/73	S,T,D,N,K,G
1T5A	P14618	KPYM_HUMAN	Homo Sapiens	2.7.1.40	A	GLY435:A	435	0.903		1	73/73	I,G,L
1T5A	P14618	KPYM_HUMAN	Homo Sapiens	2.7.1.40	A	ARG436:A	436	0.267		1	73/73	A,F,S,T,N,K,Y,E,H,D,R,G
1T5A	P14618	KPYM_HUMAN	Homo Sapiens	2.7.1.40	A	SER437:A	437	0.774		1	73/73	S,F,T,E,M,R,G,L
1T5A	P14618	KPYM_HUMAN	Homo Sapiens	2.7.1.40	A	ALA438:A	438	0.735		1	73/73	S,A,T,P,I,V
1T5A	P14618	KPYM_HUMAN	Homo Sapiens	2.7.1.40	A	ARG455:A	455	0.435		1	73/73	F,A,S,T,N,K,P,V,Q,R
1T5A	P14618	KPYM_HUMAN	Homo Sapiens	2.7.1.40	A	TRP482:A	482	0.052		1	73/73	F,S,W,T,N,K,P,Y,E,H,Q,M,D,I,G
1T5A	P14618	KPYM_HUMAN	Homo Sapiens	2.7.1.40	A	ASP485:A	485	0.416		1	73/73	S,A,Q,T,D,N,R,P,G,E
1T5A	P14618	KPYM_HUMAN	Homo Sapiens	2.7.1.40	A	VAL486:A	486	0.447		1	73/73	A,F,T,N,K,E,Y,V,M,I,R,G,L
1T5A	P14618	KPYM_HUMAN	Homo Sapiens	2.7.1.40	A	ARG489:A	489	0.37		1	73/73	F,A,S,T,W,N,M,R,I,G,L
1T5A	P14618	KPYM_HUMAN	Homo Sapiens	2.7.1.40	A	LEU512:A	512	0.61		1	70/73	A,F,T,E,V,M,I,L
1T5A	P14618	KPYM_HUMAN	Homo Sapiens	2.7.1.40	A	THR513:A	513	0.75		1	70/73	F,H,S,A,Q,T,L
1T5A	P14618	KPYM_HUMAN	Homo Sapiens	2.7.1.40	A	GLY514:A	514	0.815		1	68/73	S,A,R,G
1T5A	P14618	KPYM_HUMAN	Homo Sapiens	2.7.1.40	A	TRP515:A	515	0.174		1	64/73	F,A,S,T,W,N,V,H,D,I,G
1T5A	P14618	KPYM_HUMAN	Homo Sapiens	2.7.1.40	A	ARG516:A	516	0.389		1	64/73	A,S,T,K,P,V,H,Q,R,I,L
1T5A	P14618	KPYM_HUMAN	Homo Sapiens	2.7.1.40	A	PRO517:A	517	0.084		1	63/73	F,S,T,K,E,Y,V,Q,M,C,A,P,H,R,I,G
1T5A	P14618	KPYM_HUMAN	Homo Sapiens	2.7.1.40	A	GLY518:A	518	0.341		1	60/73	A,S,F,T,N,P,K,E,V,G
1T5A	P14618	KPYM_HUMAN	Homo Sapiens	2.7.1.40	A	SER519:A	519	0.115		1	67/73	S,A,F,T,K,P,E,V,Q,M,R,I,L
1T5A	P14618	KPYM_HUMAN	Homo Sapiens	2.7.1.40	A	GLY520:A	520	0.679		1	69/73	T,K,E,H,Q,D,R,G
1T5A	P14618	KPYM_HUMAN	Homo Sapiens	2.7.1.40	A	PHE521:A	521	0.278		1	68/73	F,A,S,T,W,N,K,Y,E,H,Q,M,D,R,G
1T5A	P14618	KPYM_HUMAN	Homo Sapiens	2.7.1.40	A	THR522:A	522	0.875		1	68/73	A,S,T,P,L
1T5A	P14618	KPYM_HUMAN	Homo Sapiens	2.7.1.40	A	ASN75:A	75	0.995	1		72/73	N
1T5A	P14618	KPYM_HUMAN	Homo Sapiens	2.7.1.40	A	SER77:A	77	0.917	1		72/73	S,A,C
1T5A	P14618	KPYM_HUMAN	Homo Sapiens	2.7.1.40	A	HIS78:A	78	0.99	1		72/73	H
1T5A	P14618	KPYM_HUMAN	Homo Sapiens	2.7.1.40	A	GLU118:A	118	0.854	1		73/73	S,K,R,E
1T5A	P14618	KPYM_HUMAN	Homo Sapiens	2.7.1.40	A	ARG120:A	120	0.93	1		73/73	H,I,R
1T5A	P14618	KPYM_HUMAN	Homo Sapiens	2.7.1.40	A	LYS206:A	206	0.523	1		73/73	H,Q,N,K,R,G
1T5A	P14618	KPYM_HUMAN	Homo Sapiens	2.7.1.40	A	LYS207:A	207	0.834	1		73/73	A,S,M,R,K
1T5A	P14618	KPYM_HUMAN	Homo Sapiens	2.7.1.40	A	GLY208:A	208	0.755	1		73/73	H,S,A,N,R,G
1T5A	P14618	KPYM_HUMAN	Homo Sapiens	2.7.1.40	A	LYS367:A	367	0.515	1		73/73	A,S,T,N,K,Y,V,H,M,I
1V4S	P35557	HXK4_HUMAN	Homo Sapiens	2.7.1.2	A	TYR61:A	61	0.322		1	56/56	F,H,W,C,I,Y
1V4S	P35557	HXK4_HUMAN	Homo Sapiens	2.7.1.2	A	VAL62:A	62	0.774		1	56/56	T,N,I,L,V
1V4S	P35557	HXK4_HUMAN	Homo Sapiens	2.7.1.2	A	ARG63:A	63	0.443		1	55/56	S,A,T,Y,V,H,Q,M,C,D,I,R,G
1V4S	P35557	HXK4_HUMAN	Homo Sapiens	2.7.1.2	A	SER64:A	64	0.212		1	55/56	S,A,Q,T,D,N,R,K,G,E
1V4S	P35557	HXK4_HUMAN	Homo Sapiens	2.7.1.2	A	THR65:A	65	0.478		1	56/56	S,F,T,Y,V,M,I,L
1V4S	P35557	HXK4_HUMAN	Homo Sapiens	2.7.1.2	A	PRO66:A	66	0.963		1	56/56	P,V
1V4S	P35557	HXK4_HUMAN	Homo Sapiens	2.7.1.2	A	GLN98:A	98	0.051		1	41/56	S,A,N,K,E,Q,D,R,G,L
1V4S	P35557	HXK4_HUMAN	Homo Sapiens	2.7.1.2	A	ILE159:A	159	0.571		1	55/56	S,N,I,L,V
1V4S	P35557	HXK4_HUMAN	Homo Sapiens	2.7.1.2	A	MET210:A	210	0.857		1	56/56	F,S,M,Y,L
1V4S	P35557	HXK4_HUMAN	Homo Sapiens	2.7.1.2	A	ILE211:A	211	0.677		1	56/56	S,A,M,I,L,V
1V4S	P35557	HXK4_HUMAN	Homo Sapiens	2.7.1.2	A	TYR214:A	214	0.269		1	56/56	S,A,N,K,Y,E,H,M,C,R,G,L
1V4S	P35557	HXK4_HUMAN	Homo Sapiens	2.7.1.2	A	TYR215:A	215	0.608		1	56/56	F,W,P,L,Y
1V4S	P35557	HXK4_HUMAN	Homo Sapiens	2.7.1.2	A	HIS218:A	218	0.216		1	56/56	S,N,K,P,E,H,Q,D,R,G
1V4S	P35557	HXK4_HUMAN	Homo Sapiens	2.7.1.2	A	CYS220:A	220	0.597		1	56/56	A,T,E,V,D,C,I,R
1V4S	P35557	HXK4_HUMAN	Homo Sapiens	2.7.1.2	A	GLU221:A	221	0.393		1	56/56	F,A,S,K,E,Y,V,M,R,I
1V4S	P35557	HXK4_HUMAN	Homo Sapiens	2.7.1.2	A	VAL222:A	222	0.485		1	56/56	A,M,I,L,V
1V4S	P35557	HXK4_HUMAN	Homo Sapiens	2.7.1.2	A	MET235:A	235	0.573		1	56/56	H,M,I,Y,L,V
1V4S	P35557	HXK4_HUMAN	Homo Sapiens	2.7.1.2	A	ARG250:A	250	0.221		1	54/56	S,T,N,P,K,E,H,Q,D,R,G,L
1V4S	P35557	HXK4_HUMAN	Homo Sapiens	2.7.1.2	A	CYS252:A	252	0.736		1	56/56	A,C,I,L,V
1V4S	P35557	HXK4_HUMAN	Homo Sapiens	2.7.1.2	A	LEU451:A	451	0.591		1	47/56	F,A,M,I,L,V
1V4S	P35557	HXK4_HUMAN	Homo Sapiens	2.7.1.2	A	VAL452:A	452	0.597		1	46/56	M,T,C,I,L,V
1V4S	P35557	HXK4_HUMAN	Homo Sapiens	2.7.1.2	A	SER453:A	453	0.846		1	46/56	S,A,T,R,L,V
1V4S	P35557	HXK4_HUMAN	Homo Sapiens	2.7.1.2	A	VAL455:A	455	0.69		1	45/56	S,Q,T,M,L,V
1V4S	P35557	HXK4_HUMAN	Homo Sapiens	2.7.1.2	A	ALA456:A	456	0.529		1	42/56	S,A,T,N,E,Y,H,Q,C,G
1V4S	P35557	HXK4_HUMAN	Homo Sapiens	2.7.1.2	A	PHE150:A	150	0.873	1		56/56	F,W,L
1V4S	P35557	HXK4_HUMAN	Homo Sapiens	2.7.1.2	A	SER151:A	151	0.967	1		56/56	A,S,T,L
1V4S	P35557	HXK4_HUMAN	Homo Sapiens	2.7.1.2	A	PHE152:A	152	0.758	1		56/56	F,I,R,Y
1V4S	P35557	HXK4_HUMAN	Homo Sapiens	2.7.1.2	A	PRO153:A	153	0.937	1		56/56	S,T,P
1V4S	P35557	HXK4_HUMAN	Homo Sapiens	2.7.1.2	A	ASN166:A	166	0.267	1		56/56	S,A,T,N,K,E,H,D,R,G
1V4S	P35557	HXK4_HUMAN	Homo Sapiens	2.7.1.2	A	THR168:A	168	0.972	1		56/56	T,K,G
1V4S	P35557	HXK4_HUMAN	Homo Sapiens	2.7.1.2	A	LYS169:A	169	0.97	1		56/56	S,K
1V4S	P35557	HXK4_HUMAN	Homo Sapiens	2.7.1.2	A	ASN204:A	204	0.981	1		56/56	S,D,N
1V4S	P35557	HXK4_HUMAN	Homo Sapiens	2.7.1.2	A	ASP205:A	205	0.939	1		56/56	N,D,V
1V4S	P35557	HXK4_HUMAN	Homo Sapiens	2.7.1.2	A	THR206:A	206	0.893	1		56/56	S,A,T,G
1V4S	P35557	HXK4_HUMAN	Homo Sapiens	2.7.1.2	A	ILE225:A	225	0.934	1		56/56	F,S,I,V
1V4S	P35557	HXK4_HUMAN	Homo Sapiens	2.7.1.2	A	THR228:A	228	0.928	1		56/56	A,S,M,T
1V4S	P35557	HXK4_HUMAN	Homo Sapiens	2.7.1.2	A	GLY229:A	229	0.943	1		56/56	I,G
1V4S	P35557	HXK4_HUMAN	Homo Sapiens	2.7.1.2	A	CYS230:A	230	0.708	1		56/56	A,F,S,T,C,V
1V4S	P35557	HXK4_HUMAN	Homo Sapiens	2.7.1.2	A	ASN231:A	231	1	1		56/56	N
1V4S	P35557	HXK4_HUMAN	Homo Sapiens	2.7.1.2	A	ALA232:A	232	0.802	1		56/56	S,A,M,G,V
1V4S	P35557	HXK4_HUMAN	Homo Sapiens	2.7.1.2	A	ASN254:A	254	0.985	1		56/56	S,N
1V4S	P35557	HXK4_HUMAN	Homo Sapiens	2.7.1.2	A	GLU256:A	256	0.978	1		56/56	D,E
1V4S	P35557	HXK4_HUMAN	Homo Sapiens	2.7.1.2	A	GLY258:A	258	0.877	1		56/56	A,S,C,G
1V4S	P35557	HXK4_HUMAN	Homo Sapiens	2.7.1.2	A	GLN287:A	287	0.851	1		56/56	H,Q,M,R
1V4S	P35557	HXK4_HUMAN	Homo Sapiens	2.7.1.2	A	GLU290:A	290	0.994	1		56/56	E
1W96	Q00955	ACAC_YEAST	Saccharomyces cerevisiae	6.4.1.2	A	ILE69:A	69	0.903		1	118/182	A,Q,I,P,G,E
1W96	Q00955	ACAC_YEAST	Saccharomyces cerevisiae	6.4.1.2	A	VAL72:A	72	0.838		1	142/182	A,S,T,C,I,K,L,V
1W96	Q00955	ACAC_YEAST	Saccharomyces cerevisiae	6.4.1.2	A	LYS73:A	73	0.847		1	142/182	S,T,N,K,E,H,Q,R,G
1W96	Q00955	ACAC_YEAST	Saccharomyces cerevisiae	6.4.1.2	A	ARG76:A	76	0.514		1	148/182	F,W,T,N,K,Q,M,I,R,L
1W96	Q00955	ACAC_YEAST	Saccharomyces cerevisiae	6.4.1.2	A	SER77:A	77	0.706		1	157/182	S,A,Q,T,I,E,V
1W96	Q00955	ACAC_YEAST	Saccharomyces cerevisiae	6.4.1.2	A	LYS80:A	80	0.422		1	157/182	A,S,N,K,E,H,Q,D,R,G
1W96	Q00955	ACAC_YEAST	Saccharomyces cerevisiae	6.4.1.2	A	HIS388:A	388	0.919		1	182/182	F,A,S,V,H,M,I,G,L
1W96	Q00955	ACAC_YEAST	Saccharomyces cerevisiae	6.4.1.2	A	PRO389:A	389	0.939		1	182/182	A,H,T,M,P
1W96	Q00955	ACAC_YEAST	Saccharomyces cerevisiae	6.4.1.2	A	THR390:A	390	0.78		1	182/182	F,T,W,Y,V,C,I,L
1W96	Q00955	ACAC_YEAST	Saccharomyces cerevisiae	6.4.1.2	A	GLU392:A	392	0.955		1	182/182	A,S,Q,M,E,L
1W96	Q00955	ACAC_YEAST	Saccharomyces cerevisiae	6.4.1.2	A	MET393:A	393	0.896		1	182/182	A,Q,M,C,K,I,E,V
1W96	Q00955	ACAC_YEAST	Saccharomyces cerevisiae	6.4.1.2	A	GLY396:A	396	0.751		1	182/182	A,H,S,N,D,G,E
1W96	Q00955	ACAC_YEAST	Saccharomyces cerevisiae	6.4.1.2	A	VAL397:A	397	0.463		1	182/182	A,F,T,N,Y,V,H,Q,M,I,R,L
1W96	Q00955	ACAC_YEAST	Saccharomyces cerevisiae	6.4.1.2	A	ASN398:A	398	0.811		1	182/182	A,S,N,P,Q,C,D,R
1W96	Q00955	ACAC_YEAST	Saccharomyces cerevisiae	6.4.1.2	A	LEU399:A	399	0.704		1	182/182	F,Q,M,W,I,L,E,V
1W96	Q00955	ACAC_YEAST	Saccharomyces cerevisiae	6.4.1.2	A	PRO400:A	400	0.883		1	182/182	A,F,M,P,I,L,V
1W96	Q00955	ACAC_YEAST	Saccharomyces cerevisiae	6.4.1.2	A	ASP417:A	417	0.378		1	2/182	H,D
1W96	Q00955	ACAC_YEAST	Saccharomyces cerevisiae	6.4.1.2	A	CYS454:A	454	0.702		1	40/182	A,S,C,R,K,E,V
1W96	Q00955	ACAC_YEAST	Saccharomyces cerevisiae	6.4.1.2	A	LEU475:A	475	0.48		1	166/182	F,A,S,T,K,P,Y,V,H,Q,D,R,I,G,L
1W96	Q00955	ACAC_YEAST	Saccharomyces cerevisiae	6.4.1.2	A	GLU477:A	477	0.429		1	180/182	F,S,K,E,Y,V,Q,M,L,A,P,H,D,R,I,G
1W96	Q00955	ACAC_YEAST	Saccharomyces cerevisiae	6.4.1.2	A	ASN485:A	485	0.579		1	182/182	S,A,F,W,N,Y,V,H,M,C,I,G,L
1W96	Q00955	ACAC_YEAST	Saccharomyces cerevisiae	6.4.1.2	A	VAL486:A	486	0.666		1	179/182	F,S,A,T,N,P,E,V,H,Q,M,D,I,L
1W96	Q00955	ACAC_YEAST	Saccharomyces cerevisiae	6.4.1.2	A	TRP487:A	487	0.61		1	180/182	F,S,A,W,T,N,Y,M,I,G,L
1W96	Q00955	ACAC_YEAST	Saccharomyces cerevisiae	6.4.1.2	A	PHE510:A	510	0.861		1	180/182	S,F,A,T,N,V,M,I,L
1W96	Q00955	ACAC_YEAST	Saccharomyces cerevisiae	6.4.1.2	A	ALA511:A	511	0.626		1	180/182	S,A,T,C,R,G,Y,V
1W96	Q00955	ACAC_YEAST	Saccharomyces cerevisiae	6.4.1.2	A	PHE512:A	512	0.59		1	180/182	F,S,W,T,K,P,Y,V,H,M,C,R,I,L
1Z8D	P11217	PYGM_HUMAN	Homo Sapiens	2.4.1.1	A	TRP67:A	68	0.502		1	158/158	H,F,W,R,G,Y,L
1Z8D	P11217	PYGM_HUMAN	Homo Sapiens	2.4.1.1	A	ILE68:A	69	0.386		1	158/158	A,T,N,K,V,H,Q,M,I,R,L
1Z8D	P11217	PYGM_HUMAN	Homo Sapiens	2.4.1.1	A	GLN71:A	72	0.286		1	158/158	F,S,A,W,T,N,K,E,Y,V,Q,M,D,I,R,L
1Z8D	P11217	PYGM_HUMAN	Homo Sapiens	2.4.1.1	A	GLN72:A	73	0.212		1	158/158	S,A,T,N,K,Y,E,V,H,Q,I,R,G,L
1Z8D	P11217	PYGM_HUMAN	Homo Sapiens	2.4.1.1	A	TYR75:A	76	0.168		1	157/158	F,A,S,T,N,K,E,Y,H,Q,D,I,R,L
1Z8D	P11217	PYGM_HUMAN	Homo Sapiens	2.4.1.1	A	GLU76:A	77	0.079		1	158/158	A,S,F,T,N,K,E,H,Q,C,D,R,I,G,L
1Z8D	P11217	PYGM_HUMAN	Homo Sapiens	2.4.1.1	A	ARG81:A	82	0.527		1	158/158	A,S,T,W,K,V,Q,C,I,R
1Z8D	P11217	PYGM_HUMAN	Homo Sapiens	2.4.1.1	A	TYR155:A	156	0.288		1	158/158	F,T,W,Y,V,H,M,R,I,L
1Z8D	P11217	PYGM_HUMAN	Homo Sapiens	2.4.1.1	A	TYR157:A	158	0.83		1	158/158	H,C,Y
1Z8D	P11217	PYGM_HUMAN	Homo Sapiens	2.4.1.1	A	ARG193:A	194	0.776		1	158/158	H,Q,K,I,R,L,V
1Z8D	P11217	PYGM_HUMAN	Homo Sapiens	2.4.1.1	A	PHE196:A	197	0.232		1	158/158	S,F,T,N,K,E,Y,V,Q,C,L,A,W,H,R,I
1Z8D	P11217	PYGM_HUMAN	Homo Sapiens	2.4.1.1	A	ASP227:A	228	0.972		1	158/158	D
1Z8D	P11217	PYGM_HUMAN	Homo Sapiens	2.4.1.1	A	THR240:A	241	0.545		1	158/158	A,S,T,N,P,V,M,I,R,L
1Z8D	P11217	PYGM_HUMAN	Homo Sapiens	2.4.1.1	A	ARG242:A	243	0.892		1	158/158	T,R
1Z8D	P11217	PYGM_HUMAN	Homo Sapiens	2.4.1.1	A	ASP306:A	307	0.861		1	158/158	A,C,D
1Z8D	P11217	PYGM_HUMAN	Homo Sapiens	2.4.1.1	A	ARG309:A	310	0.479		1	158/158	S,F,A,N,K,Y,E,H,Q,C,R,I,L
1Z8D	P11217	PYGM_HUMAN	Homo Sapiens	2.4.1.1	A	ARG310:A	311	0.632		1	158/158	S,T,N,E,H,Q,D,I,R,L
1Z8D	P11217	PYGM_HUMAN	Homo Sapiens	2.4.1.1	A	SER313:A	314	0.15		1	158/158	S,A,T,N,K,Y,E,V,H,Q,M,D,R,G,L
1Z8D	P11217	PYGM_HUMAN	Homo Sapiens	2.4.1.1	A	SER314:A	315	0.135		1	158/158	F,S,T,N,K,E,Y,V,Q,M,L,A,H,D,R,I,G
1Z8D	P11217	PYGM_HUMAN	Homo Sapiens	2.4.1.1	A	LYS315:A	316	0.352		1	19/158	R,K,I
1Z8D	P11217	PYGM_HUMAN	Homo Sapiens	2.4.1.1	A	PHE316:A	317	0.301		1	19/158	F,K,L,Y
1Z8D	P11217	PYGM_HUMAN	Homo Sapiens	2.4.1.1	A	GLY317:A	318	0.563		1	19/158	D,G
1Z8D	P11217	PYGM_HUMAN	Homo Sapiens	2.4.1.1	A	CYS318:A	319	0.124		1	19/158	S,C,N,V
1Z8D	P11217	PYGM_HUMAN	Homo Sapiens	2.4.1.1	A	ARG319:A	320	0.262		1	19/158	S,Q,T,K,P,R
1Z8D	P11217	PYGM_HUMAN	Homo Sapiens	2.4.1.1	A	GLY134:A	135	0.93	1		158/158	G
1Z8D	P11217	PYGM_HUMAN	Homo Sapiens	2.4.1.1	A	GLY135:A	136	0.865	1		158/158	D,G
1Z8D	P11217	PYGM_HUMAN	Homo Sapiens	2.4.1.1	A	LEU136:A	137	0.936	1		158/158	L
1Z8D	P11217	PYGM_HUMAN	Homo Sapiens	2.4.1.1	A	LEU139:A	140	0.936	1		158/158	L
1Z8D	P11217	PYGM_HUMAN	Homo Sapiens	2.4.1.1	A	ASP283:A	284	0.972	1		158/158	D
1Z8D	P11217	PYGM_HUMAN	Homo Sapiens	2.4.1.1	A	ASN284:A	285	0.495	1		158/158	S,A,T,N,K,E,V,H,Q,M,R,G,L
1Z8D	P11217	PYGM_HUMAN	Homo Sapiens	2.4.1.1	A	THR375:A	376	0.997	1		158/158	T
1Z8D	P11217	PYGM_HUMAN	Homo Sapiens	2.4.1.1	A	ASN376:A	377	0.883	1		158/158	D,C,N
1Z8D	P11217	PYGM_HUMAN	Homo Sapiens	2.4.1.1	A	HIS377:A	378	0.979	1		158/158	H
1Z8D	P11217	PYGM_HUMAN	Homo Sapiens	2.4.1.1	A	THR378:A	379	0.997	1		158/158	T
1Z8D	P11217	PYGM_HUMAN	Homo Sapiens	2.4.1.1	A	VAL455:A	456	0.99	1		157/158	V
1Z8D	P11217	PYGM_HUMAN	Homo Sapiens	2.4.1.1	A	ASN484:A	485	0.99	1		158/158	N
1Z8D	P11217	PYGM_HUMAN	Homo Sapiens	2.4.1.1	A	TYR573:A	574	0.909	1		157/158	Y
1Z8D	P11217	PYGM_HUMAN	Homo Sapiens	2.4.1.1	A	LYS574:A	575	0.943	1		157/158	K
1Z8D	P11217	PYGM_HUMAN	Homo Sapiens	2.4.1.1	A	THR671:A	672	0.59	1		158/158	F,T,M,K,E,Y,L
1Z8D	P11217	PYGM_HUMAN	Homo Sapiens	2.4.1.1	A	GLU672:A	673	0.953	1		158/158	E
1Z8D	P11217	PYGM_HUMAN	Homo Sapiens	2.4.1.1	A	ALA673:A	674	0.883	1		158/158	A,G
1Z8D	P11217	PYGM_HUMAN	Homo Sapiens	2.4.1.1	A	SER674:A	675	1	1		158/158	S
1Z8D	P11217	PYGM_HUMAN	Homo Sapiens	2.4.1.1	A	GLY675:A	676	0.93	1		158/158	G
1Z8D	P11217	PYGM_HUMAN	Homo Sapiens	2.4.1.1	A	THR676:A	677	0.997	1		158/158	T
2C2B	Q9S7B5	THRC1_ARATH	Arabidopsis thaliana	4.2.3.1	A	SER131:A	171	0.858		1	174/177	S,A,T,N,P,E,V,I,G,L
2C2B	Q9S7B5	THRC1_ARATH	Arabidopsis thaliana	4.2.3.1	A	ASN132:A	172	0.796		1	174/177	A,S,N,K,P,E,Q,D,I,G,L
2C2B	Q9S7B5	THRC1_ARATH	Arabidopsis thaliana	4.2.3.1	A	LEU133:A	173	0.708		1	174/177	F,A,K,E,V,Q,M,D,I,R,L
2C2B	Q9S7B5	THRC1_ARATH	Arabidopsis thaliana	4.2.3.1	A	PHE134:A	174	0.541		1	174/177	S,F,A,T,N,P,Y,E,V,H,Q,D,I,L
2C2B	Q9S7B5	THRC1_ARATH	Arabidopsis thaliana	4.2.3.1	A	TRP135:A	175	0.12		1	174/177	F,A,S,W,T,K,P,Y,E,H,Q,D,R,L
2C2B	Q9S7B5	THRC1_ARATH	Arabidopsis thaliana	4.2.3.1	A	ASP148:A	188	0.299		1	177/177	A,S,T,N,K,P,E,V,H,Q,D,R,L
2C2B	Q9S7B5	THRC1_ARATH	Arabidopsis thaliana	4.2.3.1	A	TRP150:A	190	0.405		1	176/177	S,A,F,W,N,Y,V,H,I,L
2C2B	Q9S7B5	THRC1_ARATH	Arabidopsis thaliana	4.2.3.1	A	GLN281:A	321	0.854		1	167/177	S,F,A,T,K,P,E,V,Q,D
2C2B	Q9S7B5	THRC1_ARATH	Arabidopsis thaliana	4.2.3.1	A	PHE282:A	322	0.227		1	168/177	S,A,F,T,N,Y,E,V,H,Q,M,D,C,I,L
2C2B	Q9S7B5	THRC1_ARATH	Arabidopsis thaliana	4.2.3.1	A	ASP283:A	323	0.033		1	166/177	F,S,T,N,K,Y,E,V,Q,M,L,A,W,P,H,D,I,R,G
2C2B	Q9S7B5	THRC1_ARATH	Arabidopsis thaliana	4.2.3.1	A	GLN285:A	325	0.304		1	126/177	A,F,S,T,K,P,E,V,H,Q,C,D,I,R,G
2C2B	Q9S7B5	THRC1_ARATH	Arabidopsis thaliana	4.2.3.1	A	ARG426:A	466	0.196		1	176/177	S,F,T,N,P,K,E,Y,V,H,Q,D,R,I,G,L
2CLH	P00929	TRPA_SALTY	Salmonella typhimurium	4.2.1.20	A	PHE22:A	22	0.686	1		150/151	F,H,Y
2CLH	P00929	TRPA_SALTY	Salmonella typhimurium	4.2.1.20	A	GLU49:A	49	1	1		149/151	E
2CLH	P00929	TRPA_SALTY	Salmonella typhimurium	4.2.1.20	A	LEU50:A	50	0.675	1		149/151	M,I,L,V
2CLH	P00929	TRPA_SALTY	Salmonella typhimurium	4.2.1.20	A	ALA59:A	59	0.907	1		149/151	S,A,M,I,G,L,Y
2CLH	P00929	TRPA_SALTY	Salmonella typhimurium	4.2.1.20	A	ASP60:A	60	0.989	1		149/151	D,E
2CLH	P00929	TRPA_SALTY	Salmonella typhimurium	4.2.1.20	A	ILE64:A	64	0.974	1		151/151	I,L,V
2CLH	P00929	TRPA_SALTY	Salmonella typhimurium	4.2.1.20	A	LEU100:A	100	0.858	1		149/151	F,M,Y,L
2CLH	P00929	TRPA_SALTY	Salmonella typhimurium	4.2.1.20	A	TYR102:A	102	0.952	1		149/151	S,C,Y
2CLH	P00929	TRPA_SALTY	Salmonella typhimurium	4.2.1.20	A	LEU127:A	127	0.821	1		151/151	C,I,L,V
2CLH	P00929	TRPA_SALTY	Salmonella typhimurium	4.2.1.20	A	VAL128:A	128	0.6	1		151/151	A,F,T,P,V,M,C,I,L
2CLH	P00929	TRPA_SALTY	Salmonella typhimurium	4.2.1.20	A	ALA129:A	129	0.892	1		151/151	A,T,I,P,V
2CLH	P00929	TRPA_SALTY	Salmonella typhimurium	4.2.1.20	A	ASP130:A	130	0.993	1		149/151	N,D,E
2CLH	P00929	TRPA_SALTY	Salmonella typhimurium	4.2.1.20	A	ILE153:A	153	0.851	1		151/151	F,I,L,V
2CLH	P00929	TRPA_SALTY	Salmonella typhimurium	4.2.1.20	A	TYR173:A	173	0.795	1		149/151	F,W,M,C,I,Y,L
2CLH	P00929	TRPA_SALTY	Salmonella typhimurium	4.2.1.20	A	TYR175:A	175	0.989	1		149/151	Y
2CLH	P00929	TRPA_SALTY	Salmonella typhimurium	4.2.1.20	A	LEU177:A	177	0.828	1		147/151	A,Q,I,L,V
2CLH	P00929	TRPA_SALTY	Salmonella typhimurium	4.2.1.20	A	ARG179:A	179	0.596	1		151/151	F,S,T,K,Y,V,Q,M,C,I,R,G,L
2CLH	P00929	TRPA_SALTY	Salmonella typhimurium	4.2.1.20	A	VAL182:A	182	0.765	1		151/151	S,A,T,I,V
2CLH	P00929	TRPA_SALTY	Salmonella typhimurium	4.2.1.20	A	THR183:A	183	1	1		151/151	T,R,P
2CLH	P00929	TRPA_SALTY	Salmonella typhimurium	4.2.1.20	A	GLY184:A	184	0.937	1		151/151	S,D,G,V
2CLH	P00929	TRPA_SALTY	Salmonella typhimurium	4.2.1.20	A	GLY211:A	211	0.967	1		151/151	R,G,E
2CLH	P00929	TRPA_SALTY	Salmonella typhimurium	4.2.1.20	A	PHE212:A	212	0.914	1		151/151	F,A,I,R,L
2CLH	P00929	TRPA_SALTY	Salmonella typhimurium	4.2.1.20	A	GLY213:A	213	0.967	1		151/151	S,D,G
2CLH	P00929	TRPA_SALTY	Salmonella typhimurium	4.2.1.20	A	ILE214:A	214	0.888	1		151/151	I,L,V
2CLH	P00929	TRPA_SALTY	Salmonella typhimurium	4.2.1.20	A	SER215:A	215	0.72	1		151/151	A,S,T,N,K,E,Y,H,Q,C,R
2CLH	P00929	TRPA_SALTY	Salmonella typhimurium	4.2.1.20	A	ILE232:A	232	0.843	1		151/151	A,I,L,V
2CLH	P00929	TRPA_SALTY	Salmonella typhimurium	4.2.1.20	A	SER233:A	233	0.783	1		151/151	S,F,A,T,C,I,L,V
2CLH	P00929	TRPA_SALTY	Salmonella typhimurium	4.2.1.20	A	GLY234:A	234	0.933	1		151/151	A,K,G
2CLH	P00929	TRPA_SALTY	Salmonella typhimurium	4.2.1.20	A	SER235:A	235	0.956	1		151/151	A,S,T
2CLH	P00929	TRPA_SALTY	Salmonella typhimurium	4.2.1.20	A	ALA236:A	236	0.809	1		151/151	A,S,K,P,Y,E,V,Q,M,C,I,R,G,L
2EWN	P06709	BIRA_ECOLI	Escherichia coli	6.3.4.15	A	ASP88:A	88	0.354		1	163/163	A,S,T,N,P,K,E,V,Q,D,G
2EWN	P06709	BIRA_ECOLI	Escherichia coli	6.3.4.15	A	SER89:A	89	1		1	163/163	S,N
2EWN	P06709	BIRA_ECOLI	Escherichia coli	6.3.4.15	A	THR90:A	90	1		1	163/163	S,T
2EWN	P06709	BIRA_ECOLI	Escherichia coli	6.3.4.15	A	ASN91:A	91	0.913		1	163/163	S,H,Q,M,N,I,G
2EWN	P06709	BIRA_ECOLI	Escherichia coli	6.3.4.15	A	GLN92:A	92	0.266		1	163/163	F,S,T,N,K,E,V,Q,M,L,A,W,P,H,D,I,R,G
2EWN	P06709	BIRA_ECOLI	Escherichia coli	6.3.4.15	A	GLN112:A	112	0.979		1	163/163	Q,M
2EWN	P06709	BIRA_ECOLI	Escherichia coli	6.3.4.15	A	ALA114:A	114	0.544		1	163/163	S,A,T,N,K,E,V,H,Q,M,D,R,G,L
2EWN	P06709	BIRA_ECOLI	Escherichia coli	6.3.4.15	A	GLY115:A	115	0.932		1	163/163	A,P,G
2EWN	P06709	BIRA_ECOLI	Escherichia coli	6.3.4.15	A	ARG116:A	116	0.829		1	163/163	F,S,K,Y,V,H,R,I,L
2EWN	P06709	BIRA_ECOLI	Escherichia coli	6.3.4.15	A	GLY117:A	117	0.975		1	163/163	G
2EWN	P06709	BIRA_ECOLI	Escherichia coli	6.3.4.15	A	ARG118:A	118	1		1	163/163	R
2EWN	P06709	BIRA_ECOLI	Escherichia coli	6.3.4.15	A	ARG119:A	119	0.685		1	163/163	S,F,T,K,Y,V,H,Q,M,I,R,L
2EWN	P06709	BIRA_ECOLI	Escherichia coli	6.3.4.15	A	ARG121:A	121	0.919		1	163/163	K,R,G
2EWN	P06709	BIRA_ECOLI	Escherichia coli	6.3.4.15	A	LYS122:A	122	0.154		1	163/163	A,S,T,N,K,P,E,V,H,Q,D,R,G
2EWN	P06709	BIRA_ECOLI	Escherichia coli	6.3.4.15	A	TRP123:A	123	0.944		1	163/163	F,W
2EWN	P06709	BIRA_ECOLI	Escherichia coli	6.3.4.15	A	PHE124:A	124	0.138		1	162/163	F,A,S,T,N,Y,E,V,H,Q,M,C,D,I,L
2EWN	P06709	BIRA_ECOLI	Escherichia coli	6.3.4.15	A	SER125:A	125	0.916		1	163/163	A,S,T,C
2EWN	P06709	BIRA_ECOLI	Escherichia coli	6.3.4.15	A	PRO126:A	126	0.788		1	162/163	A,S,T,K,P,E,V,Q,M,D,R,G
2EWN	P06709	BIRA_ECOLI	Escherichia coli	6.3.4.15	A	ASN130:A	130	0.869		1	163/163	H,A,S,Q,C,N,G
2EWN	P06709	BIRA_ECOLI	Escherichia coli	6.3.4.15	A	LEU131:A	131	0.697		1	163/163	A,F,M,I,L,V
2EWN	P06709	BIRA_ECOLI	Escherichia coli	6.3.4.15	A	TYR132:A	132	0.707		1	163/163	A,S,T,W,K,Y,V,H,M,C,I,L
2EWN	P06709	BIRA_ECOLI	Escherichia coli	6.3.4.15	A	LEU133:A	133	0.547		1	163/163	A,F,T,Y,V,M,C,L
2EWN	P06709	BIRA_ECOLI	Escherichia coli	6.3.4.15	A	SER134:A	134	0.938		1	163/163	S,T
2EWN	P06709	BIRA_ECOLI	Escherichia coli	6.3.4.15	A	LYS172:A	172	0.963		1	163/163	Q,R,K
2EWN	P06709	BIRA_ECOLI	Escherichia coli	6.3.4.15	A	ASP176:A	176	1		1	163/163	D
2EWN	P06709	BIRA_ECOLI	Escherichia coli	6.3.4.15	A	LYS183:A	183	1		1	163/163	K
2EWN	P06709	BIRA_ECOLI	Escherichia coli	6.3.4.15	A	LEU184:A	184	0.672		1	163/163	A,F,T,V,M,C,I,L
2EWN	P06709	BIRA_ECOLI	Escherichia coli	6.3.4.15	A	ALA185:A	185	0.688		1	163/163	S,A,T,C,G,V
2EWN	P06709	BIRA_ECOLI	Escherichia coli	6.3.4.15	A	GLY186:A	186	0.975		1	163/163	G
2EWN	P06709	BIRA_ECOLI	Escherichia coli	6.3.4.15	A	ILE187:A	187	0.879		1	163/163	F,T,M,N,I,L,V
2EWN	P06709	BIRA_ECOLI	Escherichia coli	6.3.4.15	A	LEU188:A	188	0.929		1	163/163	T,I,G,L
2EWN	P06709	BIRA_ECOLI	Escherichia coli	6.3.4.15	A	GLU190:A	190	0.947		1	163/163	N,D,E
2EWN	P06709	BIRA_ECOLI	Escherichia coli	6.3.4.15	A	ILE203:A	203	0.666		1	163/163	S,A,T,V,Q,M,C,I,L
2EWN	P06709	BIRA_ECOLI	Escherichia coli	6.3.4.15	A	GLY204:A	204	0.96		1	163/163	S,G
2EWN	P06709	BIRA_ECOLI	Escherichia coli	6.3.4.15	A	ALA205:A	205	0.744		1	163/163	A,F,T,P,V,M,I,L
2EWN	P06709	BIRA_ECOLI	Escherichia coli	6.3.4.15	A	GLY206:A	206	0.975		1	163/163	G
2EWN	P06709	BIRA_ECOLI	Escherichia coli	6.3.4.15	A	ILE207:A	207	0.716		1	163/163	F,M,I,L,V
2EWN	P06709	BIRA_ECOLI	Escherichia coli	6.3.4.15	A	ASN208:A	208	1		1	163/163	D,N
2EWN	P06709	BIRA_ECOLI	Escherichia coli	6.3.4.15	A	MET211:A	211	0.622		1	161/163	S,A,F,T,N,P,E,V,H,Q,M,C,I,G,L
2EWN	P06709	BIRA_ECOLI	Escherichia coli	6.3.4.15	A	VAL214:A	214	0.188		1	149/163	S,A,T,N,P,K,E,V,H,Q,M,D,R,G,L
2EWN	P06709	BIRA_ECOLI	Escherichia coli	6.3.4.15	A	VAL218:A	218	0.191		1	163/163	A,S,T,N,P,K,E,V,H,Q,C,D,I,R,G,L
2EWN	P06709	BIRA_ECOLI	Escherichia coli	6.3.4.15	A	VAL219:A	219	0.691		1	160/163	A,F,T,P,I,L,V
2EWN	P06709	BIRA_ECOLI	Escherichia coli	6.3.4.15	A	ASN220:A	220	0.46		1	161/163	S,A,T,N,K,Y,E,Q,C,D,R,G,L
2EWN	P06709	BIRA_ECOLI	Escherichia coli	6.3.4.15	A	GLN221:A	221	0.416		1	161/163	S,T,N,K,Y,E,V,Q,M,C,L,A,P,H,D,R,G
2EWN	P06709	BIRA_ECOLI	Escherichia coli	6.3.4.15	A	GLY222:A	222	0.366		1	162/163	A,S,T,N,P,K,E,V,Q,D,R,I,G,L
2EWN	P06709	BIRA_ECOLI	Escherichia coli	6.3.4.15	A	TRP223:A	223	0.847		1	162/163	S,A,W,K,P,Y,V,Q,M,I,L
2EWN	P06709	BIRA_ECOLI	Escherichia coli	6.3.4.15	A	ILE224:A	224	0.757		1	161/163	S,A,T,N,K,E,V,Q,C,I,R,G
2EWN	P06709	BIRA_ECOLI	Escherichia coli	6.3.4.15	A	GLU313:A	313	0.888		1	159/163	D,E
2FQQ	P29466	CASP1_HUMAN	Homo Sapiens	3.4.22.36	A	ARG240:A	240	0.486		1	50/51	F,S,K,E,H,Q,M,R,G,L
2FQQ	P29466	CASP1_HUMAN	Homo Sapiens	3.4.22.36	A	GLU241:A	241	0.351		1	51/51	S,A,N,P,E,H,Q,D,G
2FQQ	P29466	CASP1_HUMAN	Homo Sapiens	3.4.22.36	A	LEU258:A	258	0.571		1	51/51	T,P,Y,V,M,D,I,L
2FQQ	P29466	CASP1_HUMAN	Homo Sapiens	3.4.22.36	A	ILE282:A	282	0.888		1	51/51	F,M,I,V
2FQQ	P29466	CASP1_HUMAN	Homo Sapiens	3.4.22.36	A	ARG286:A	286	0.859		1	49/51	Q,R,G
2GS7	P00533	EGFR_HUMAN	Homo Sapiens	2.7.10.1	A	LYS721:A	745	0.973	1		120/120	K
2GS7	P00533	EGFR_HUMAN	Homo Sapiens	2.7.10.1	A	ASP813:A	837	0.991	1		120/120	D
2GS7	P00533	EGFR_HUMAN	Homo Sapiens	2.7.10.1	A	ARG817:A	841	0.921	1		120/120	A,R
2GS7	P00533	EGFR_HUMAN	Homo Sapiens	2.7.10.1	A	ASN818:A	842	1	1		120/120	N
2GS7	P00533	EGFR_HUMAN	Homo Sapiens	2.7.10.1	A	THR830:A	854	0.776	1		120/120	A,S,T,C,G
2GS7	P00533	EGFR_HUMAN	Homo Sapiens	2.7.10.1	A	ASP831:A	855	0.991	1		120/120	D
2HIM	P0A962	ASPG1_ECOLI	Escherichia coli	3.5.1.1	A	PRO175:A	175	0.625		1	155/155	F,T,P,Y,V,M,I,L
2HIM	P0A962	ASPG1_ECOLI	Escherichia coli	3.5.1.1	A	ASN176:A	176	0.897		1	155/155	S,Q,T,D,N,G,E
2HIM	P0A962	ASPG1_ECOLI	Escherichia coli	3.5.1.1	A	THR271:A	271	0.846		1	155/155	A,S,T
2HIM	P0A962	ASPG1_ECOLI	Escherichia coli	3.5.1.1	A	CYS273:A	273	0.774		1	155/155	A,S,T,C,P,I,V
2HIM	P0A962	ASPG1_ECOLI	Escherichia coli	3.5.1.1	A	MET274:A	274	0.241		1	155/155	A,S,F,T,N,P,Y,V,H,Q,M,R,I,G,L
2HIM	P0A962	ASPG1_ECOLI	Escherichia coli	3.5.1.1	A	SER275:A	275	0.3		1	155/155	F,A,S,W,T,N,K,Y,E,V,H,Q,M,R,G,L
2HIM	P0A962	ASPG1_ECOLI	Escherichia coli	3.5.1.1	A	GLY276:A	276	0.914		1	155/155	A,D,G,E
2HIM	P0A962	ASPG1_ECOLI	Escherichia coli	3.5.1.1	A	LYS277:A	277	0.451		1	155/155	A,S,F,T,K,P,E,Y,H,Q,M,R,I,G
2HIM	P0A962	ASPG1_ECOLI	Escherichia coli	3.5.1.1	A	ALA298:A	298	0.107		1	155/155	A,F,S,N,K,E,Y,H,Q,C,D,R,G,L
2HIM	P0A962	ASPG1_ECOLI	Escherichia coli	3.5.1.1	A	ASP299:A	299	0.804		1	155/155	H,A,S,T,N,D,G,E
2HIM	P0A962	ASPG1_ECOLI	Escherichia coli	3.5.1.1	A	MET300:A	300	0.827		1	155/155	S,T,M,I,P,L
2HIM	P0A962	ASPG1_ECOLI	Escherichia coli	3.5.1.1	A	THR301:A	301	0.841		1	155/155	S,T,N,P,I,L
2HIM	P0A962	ASPG1_ECOLI	Escherichia coli	3.5.1.1	A	VAL302:A	302	0.421		1	155/155	F,S,A,T,K,P,V,Q,D,I,G,L
2HIM	P0A962	ASPG1_ECOLI	Escherichia coli	3.5.1.1	A	THR14:A	14	0.984	1		153/155	T,K
2HIM	P0A962	ASPG1_ECOLI	Escherichia coli	3.5.1.1	A	THR91:A	91	0.984	1		155/155	S,T
2HIM	P0A962	ASPG1_ECOLI	Escherichia coli	3.5.1.1	A	ASP92:A	92	0.995	1		155/155	D
2HIM	P0A962	ASPG1_ECOLI	Escherichia coli	3.5.1.1	A	GLN118:A	118	0.964	1		155/155	Q,M
2HIM	P0A962	ASPG1_ECOLI	Escherichia coli	3.5.1.1	A	LYS163:A	163	0.989	1		155/155	K
2HIM	P0A962	ASPG1_ECOLI	Escherichia coli	3.5.1.1	A	HIS165:A	165	0.709	1		155/155	A,S,H,D,N,R,L,Y
2HIM	P0A962	ASPG1_ECOLI	Escherichia coli	3.5.1.1	A	ALA166:A	166	0.86	1		155/155	A,S,T,N
2HIM	P0A962	ASPG1_ECOLI	Escherichia coli	3.5.1.1	A	ASP167:A	167	0.583	1		155/155	S,W,T,N,K,E,V,Q,M,D,I,R,G,L
2I80	Q5HEB7	DDL_STAAC	Arabidopsis thaliana	6.3.2.4	A	GLU16:A	16	0.998		1	252/252	E
2I80	Q5HEB7	DDL_STAAC	Arabidopsis thaliana	6.3.2.4	A	VAL19:A	19	0.872		1	108/252	I,V
2I80	Q5HEB7	DDL_STAAC	Arabidopsis thaliana	6.3.2.4	A	SER20:A	20	0.987		1	108/252	A,S
2I80	Q5HEB7	DDL_STAAC	Arabidopsis thaliana	6.3.2.4	A	ILE21:A	21	0.535		1	108/252	F,N,K,Y,V,C,R,I,L
2I80	Q5HEB7	DDL_STAAC	Arabidopsis thaliana	6.3.2.4	A	THR23:A	23	0.895		1	252/252	A,S,T,C,G
2I80	Q5HEB7	DDL_STAAC	Arabidopsis thaliana	6.3.2.4	A	ALA24:A	24	0.861		1	252/252	S,A,T,N,C,G,V
2I80	Q5HEB7	DDL_STAAC	Arabidopsis thaliana	6.3.2.4	A	VAL91:A	91	0.652		1	252/252	F,A,W,C,I,L,V
2I80	Q5HEB7	DDL_STAAC	Arabidopsis thaliana	6.3.2.4	A	PHE92:A	92	0.761		1	252/252	F,W,E,Y,V,M,I,L
2I80	Q5HEB7	DDL_STAAC	Arabidopsis thaliana	6.3.2.4	A	PRO93:A	93	0.789		1	252/252	S,A,N,P,V,M,I,L
2I80	Q5HEB7	DDL_STAAC	Arabidopsis thaliana	6.3.2.4	A	LEU94:A	94	0.739		1	252/252	S,F,A,T,N,V,H,Q,M,C,I,G,L
2I80	Q5HEB7	DDL_STAAC	Arabidopsis thaliana	6.3.2.4	A	LEU95:A	95	0.741		1	252/252	A,F,M,I,Y,L,V
2I80	Q5HEB7	DDL_STAAC	Arabidopsis thaliana	6.3.2.4	A	HIS96:A	96	0.97		1	252/252	H,S,G
2I80	Q5HEB7	DDL_STAAC	Arabidopsis thaliana	6.3.2.4	A	VAL117:A	117	0.839		1	252/252	F,A,S,T,N,V,Q,M,I,G,L
2I80	Q5HEB7	DDL_STAAC	Arabidopsis thaliana	6.3.2.4	A	GLY118:A	118	0.95		1	252/252	H,A,T,C,G
2I80	Q5HEB7	DDL_STAAC	Arabidopsis thaliana	6.3.2.4	A	ASN119:A	119	0.853		1	252/252	S,A,T,N,P,V,C,I,G
2I80	Q5HEB7	DDL_STAAC	Arabidopsis thaliana	6.3.2.4	A	LEU289:A	289	0.611		1	252/252	S,F,A,W,P,Y,E,V,M,C,I,G,L
2I80	Q5HEB7	DDL_STAAC	Arabidopsis thaliana	6.3.2.4	A	ALA309:A	309	0.939		1	252/252	S,A,T,I,P,L,V
2I80	Q5HEB7	DDL_STAAC	Arabidopsis thaliana	6.3.2.4	A	MET310:A	310	0.778		1	252/252	F,A,S,T,N,V,H,Q,M,C,R,I,L
2I80	Q5HEB7	DDL_STAAC	Arabidopsis thaliana	6.3.2.4	A	PRO311:A	311	0.914		1	252/252	A,S,T,M,C,P,L,V
2I80	Q5HEB7	DDL_STAAC	Arabidopsis thaliana	6.3.2.4	A	GLY312:A	312	0.956		1	252/252	A,S,T,G
2I80	Q5HEB7	DDL_STAAC	Arabidopsis thaliana	6.3.2.4	A	PHE313:A	313	0.945		1	252/252	S,F,M,R,L
2I80	Q5HEB7	DDL_STAAC	Arabidopsis thaliana	6.3.2.4	A	LEU337:A	337	0.591		1	241/252	F,S,A,T,V,M,C,I,L
2ONB	P04818	TYSY_HUMAN	Homo Sapiens	2.1.1.45	A	ASP49:A	49	0.741		1	134/134	A,T,N,D,K,P,E,V
2ONB	P04818	TYSY_HUMAN	Homo Sapiens	2.1.1.45	A	ARG50:A	50	0.952		1	134/134	K,R,G
2ONB	P04818	TYSY_HUMAN	Homo Sapiens	2.1.1.45	A	THR51:A	51	0.93		1	130/134	Q,T,K,R,E
2ONB	P04818	TYSY_HUMAN	Homo Sapiens	2.1.1.45	A	GLY52:A	52	0.59		1	134/134	S,A,T,N,K,P,E,V,H,M,D,R,G
2ONB	P04818	TYSY_HUMAN	Homo Sapiens	2.1.1.45	A	ASN183:A	183	0.888		1	134/134	A,H,Q,D,N,I,R
2ONB	P04818	TYSY_HUMAN	Homo Sapiens	2.1.1.45	A	ARG185:A	185	0.276		1	134/134	A,S,T,N,K,P,E,V,Q,C,D,R,I,G,L
2ONB	P04818	TYSY_HUMAN	Homo Sapiens	2.1.1.45	A	ASP186:A	186	0.417		1	134/134	S,A,N,E,V,Q,D,I,L
2ONB	P04818	TYSY_HUMAN	Homo Sapiens	2.1.1.45	A	HIS196:A	196	0.856		1	134/134	A,T,N,V,H,M,C,L
2ONB	P04818	TYSY_HUMAN	Homo Sapiens	2.1.1.45	A	ARG215:A	215	0.997		1	134/134	R
2ONB	P04818	TYSY_HUMAN	Homo Sapiens	2.1.1.45	A	SER216:A	216	0.988		1	134/134	S,C
2ONB	P04818	TYSY_HUMAN	Homo Sapiens	2.1.1.45	A	GLY217:A	217	0.533		1	134/134	A,H,W,C,N,G,V
2ONB	P04818	TYSY_HUMAN	Homo Sapiens	2.1.1.45	A	HIS256:A	256	1		1	134/134	H
2ONB	P04818	TYSY_HUMAN	Homo Sapiens	2.1.1.45	A	TYR258:A	258	0.978		1	134/134	Y
2Q5O	P51852	DCIP_AZOBR	Azospirillum brasilense	4.1.1.74	A	ARG60:A	60	0.915		1	87/89	H,F,Q,R,K,L,Y
2Q5O	P51852	DCIP_AZOBR	Azospirillum brasilense	4.1.1.74	A	TYR61:A	61	0.268		1	87/89	F,S,A,T,Y,V,Q,C,I,L
2Q5O	P51852	DCIP_AZOBR	Azospirillum brasilense	4.1.1.74	A	GLU89:A	89	0.938		1	88/89	A,S,T,N,D,R,E
2Q5O	P51852	DCIP_AZOBR	Azospirillum brasilense	4.1.1.74	A	VAL211:A	211	0.415		1	88/89	A,F,S,T,N,K,P,E,V,H,Q,M,I,R,G,L
2Q5O	P51852	DCIP_AZOBR	Azospirillum brasilense	4.1.1.74	A	ARG214:A	214	0.36		1	88/89	A,S,T,W,N,K,V,D,R,I,G,L
2Q5O	P51852	DCIP_AZOBR	Azospirillum brasilense	4.1.1.74	A	ARG215:A	215	0.208		1	74/89	S,T,N,K,Y,V,Q,M,L,A,W,P,H,D,I,R,G
2Q5O	P51852	DCIP_AZOBR	Azospirillum brasilense	4.1.1.74	A	GLU219:A	219	0.086		1	88/89	F,S,T,N,K,Y,E,V,Q,C,L,A,P,H,D,R,I,G
2Q5O	P51852	DCIP_AZOBR	Azospirillum brasilense	4.1.1.74	A	PHE237:A	237	0.407		1	88/89	S,A,F,P,Y,V,Q,I,G,L
2Q5O	P51852	DCIP_AZOBR	Azospirillum brasilense	4.1.1.74	A	MET238:A	238	0.614		1	89/89	F,A,S,N,P,K,E,H,Q,M,R,L
2Q5O	P51852	DCIP_AZOBR	Azospirillum brasilense	4.1.1.74	A	GLY239:A	239	0.804		1	89/89	H,A,S,N,R,P,G
2Q5O	P51852	DCIP_AZOBR	Azospirillum brasilense	4.1.1.74	A	ARG240:A	240	0.752		1	89/89	A,F,S,W,N,P,K,Q,I,R,G,L
2Q5O	P51852	DCIP_AZOBR	Azospirillum brasilense	4.1.1.74	A	GLY241:A	241	0.818		1	89/89	S,T,E,V,D,C,G,L
2Q5O	P51852	DCIP_AZOBR	Azospirillum brasilense	4.1.1.74	A	LEU242:A	242	0.222		1	88/89	S,A,F,T,N,P,V,H,M,C,R,I,G,L
2Q5O	P51852	DCIP_AZOBR	Azospirillum brasilense	4.1.1.74	A	LEU375:A	375	0.329		1	89/89	F,M,T,I,Y,L,V
2Q5O	P51852	DCIP_AZOBR	Azospirillum brasilense	4.1.1.74	A	ALA393:A	393	0.593		1	89/89	S,A,F,T,N,K,E,Y,V,H,D,C,R,G,L
2Q5O	P51852	DCIP_AZOBR	Azospirillum brasilense	4.1.1.74	A	GLY394:A	394	0.272		1	88/89	S,T,N,K,P,Y,H,Q,M,C,I,R,G,L
2Q5O	P51852	DCIP_AZOBR	Azospirillum brasilense	4.1.1.74	A	LEU395:A	395	0.243		1	89/89	F,A,W,Y,V,H,I,R,G,L
2Q5O	P51852	DCIP_AZOBR	Azospirillum brasilense	4.1.1.74	A	MET396:A	396	0.543		1	89/89	F,E,Y,V,H,M,R,I,L
2Q5O	P51852	DCIP_AZOBR	Azospirillum brasilense	4.1.1.74	A	ALA397:A	397	0.573		1	88/89	F,A,S,T,N,K,Y,V,D,C,I,G,L
2Q5O	P51852	DCIP_AZOBR	Azospirillum brasilense	4.1.1.74	A	PRO398:A	398	0.905		1	89/89	A,S,N,P,E,H,Q,C,G
2Q5O	P51852	DCIP_AZOBR	Azospirillum brasilense	4.1.1.74	A	GLY399:A	399	0.57		1	89/89	S,F,A,N,P,Y,V,H,M,R,G,L
2Q5O	P51852	DCIP_AZOBR	Azospirillum brasilense	4.1.1.74	A	PHE406:A	406	0.426		1	89/89	S,F,W,N,Y,V,H,M,I,G
2Q5O	P51852	DCIP_AZOBR	Azospirillum brasilense	4.1.1.74	A	ASN81:A	81	0.917	1		88/89	A,S,Q,T,D,N,P,G,E
2Q5O	P51852	DCIP_AZOBR	Azospirillum brasilense	4.1.1.74	A	ASP282:A	282	0.864	1		86/89	S,T,W,N,P,E,Q,D,G
2Q5O	P51852	DCIP_AZOBR	Azospirillum brasilense	4.1.1.74	A	THR283:A	283	0.717	1		86/89	F,T,K,Y,V,I,R,L
2Q5O	P51852	DCIP_AZOBR	Azospirillum brasilense	4.1.1.74	A	MET380:A	380	0.94	1		89/89	A,S,Q,T,M,I,G,V
2Q5O	P51852	DCIP_AZOBR	Azospirillum brasilense	4.1.1.74	A	GLY381:A	381	0.963	1		89/89	A,T,M,G,L
2Q5O	P51852	DCIP_AZOBR	Azospirillum brasilense	4.1.1.74	A	ASP382:A	382	0.784	1		89/89	A,S,F,T,N,K,P,V,H,Q,C,D,L
2Q5O	P51852	DCIP_AZOBR	Azospirillum brasilense	4.1.1.74	A	CYS383:A	383	0.79	1		89/89	A,F,S,T,N,P,Y,V,H,D,C,I,L
2Q5O	P51852	DCIP_AZOBR	Azospirillum brasilense	4.1.1.74	A	PHE385:A	385	0.391	1		89/89	A,F,T,W,N,Y,V,Q,D,I,G
2Q5O	P51852	DCIP_AZOBR	Azospirillum brasilense	4.1.1.74	A	TYR401:A	401	0.437	1		87/89	F,A,W,N,Y,H,Q,M,I,L
2Q5O	P51852	DCIP_AZOBR	Azospirillum brasilense	4.1.1.74	A	ALA402:A	402	0.926	1		89/89	A,S,Q,N,G,L
2Q5O	P51852	DCIP_AZOBR	Azospirillum brasilense	4.1.1.74	A	GLY403:A	403	0.921	1		89/89	A,S,T,N,P,V,H,C,G
2Q5O	P51852	DCIP_AZOBR	Azospirillum brasilense	4.1.1.74	A	MET404:A	404	0.961	1		88/89	T,M,C,I,L,V
2Q5O	P51852	DCIP_AZOBR	Azospirillum brasilense	4.1.1.74	A	GLY405:A	405	0.981	1		89/89	A,D,G
2Q5O	P51852	DCIP_AZOBR	Azospirillum brasilense	4.1.1.74	A	VAL427:A	427	0.603	1		89/89	S,A,T,E,V,Q,M,D,C,I
2Q5O	P51852	DCIP_AZOBR	Azospirillum brasilense	4.1.1.74	A	GLY428:A	428	0.995	1		89/89	G
2Q5O	P51852	DCIP_AZOBR	Azospirillum brasilense	4.1.1.74	A	ASP429:A	429	0.999	1		89/89	D
2Q5O	P51852	DCIP_AZOBR	Azospirillum brasilense	4.1.1.74	A	GLY430:A	430	0.883	1		89/89	A,F,S,T,G,L,V
2Q5O	P51852	DCIP_AZOBR	Azospirillum brasilense	4.1.1.74	A	ALA431:A	431	0.924	1		89/89	A,S,T,C,D,G
2Q5O	P51852	DCIP_AZOBR	Azospirillum brasilense	4.1.1.74	A	PHE432:A	432	0.648	1		89/89	A,F,W,T,I,L,V
2Q5O	P51852	DCIP_AZOBR	Azospirillum brasilense	4.1.1.74	A	MET434:A	434	0.807	1		89/89	F,H,Q,M,I,E,L,Y,V
2Q5O	P51852	DCIP_AZOBR	Azospirillum brasilense	4.1.1.74	A	PHE454:A	454	0.465	1		89/89	F,W,M,N,I,G,L,V
2Q5O	P51852	DCIP_AZOBR	Azospirillum brasilense	4.1.1.74	A	ASN456:A	456	1	1		89/89	D,N
2Q5O	P51852	DCIP_AZOBR	Azospirillum brasilense	4.1.1.74	A	SER458:A	458	0.485	1		89/89	F,A,S,W,T,N,Y,E,V,H,Q,C,R,I,G
2Q5O	P51852	DCIP_AZOBR	Azospirillum brasilense	4.1.1.74	A	TRP459:A	459	0.607	1		86/89	F,W,T,K,Y,Q,R,G,L
2Q5O	P51852	DCIP_AZOBR	Azospirillum brasilense	4.1.1.74	A	GLU460:A	460	0.931	1		88/89	S,A,T,N,E,H,C,D,G
2Q5O	P51852	DCIP_AZOBR	Azospirillum brasilense	4.1.1.74	A	MET461:A	461	0.834	1		87/89	F,A,N,V,M,C,D,I,G,L
2Q5O	P51852	DCIP_AZOBR	Azospirillum brasilense	4.1.1.74	A	LEU462:A	462	0.869	1		87/89	F,T,D,I,G,E,L,V
2Q5O	P51852	DCIP_AZOBR	Azospirillum brasilense	4.1.1.74	A	PHE465:A	465	0.557	1		87/89	S,F,W,N,P,E,Y,Q,M,I,L
2Q5O	P51852	DCIP_AZOBR	Azospirillum brasilense	4.1.1.74	A	LEU474:A	474	0.658	1		88/89	F,A,P,V,Q,M,I,G,L
2Q5O	P51852	DCIP_AZOBR	Azospirillum brasilense	4.1.1.74	A	LEU529:A	529	0.876	1		66/89	F,Q,M,Y,L,V
2Q5O	P51852	DCIP_AZOBR	Azospirillum brasilense	4.1.1.74	A	PHE532:A	532	0.469	1		57/89	S,A,F,W,P,Q,M,R,G,L
2Q5O	P51852	DCIP_AZOBR	Azospirillum brasilense	4.1.1.74	A	GLN536:A	536	0.639	1		31/89	F,A,Q,T,L,V
2R1R	P00452	RIR1_ECOLI	Escherichia coli	1.17.4.1	A	GLY231:A	231	0.116		1	57/58	S,A,N,K,P,E,V,Q,D,G,L
2R1R	P00452	RIR1_ECOLI	Escherichia coli	1.17.4.1	A	ASP232:A	232	0.862		1	57/58	S,F,A,T,D,I,R
2R1R	P00452	RIR1_ECOLI	Escherichia coli	1.17.4.1	A	SER233:A	233	0.698		1	58/58	S,T,N,D,C,K
2R1R	P00452	RIR1_ECOLI	Escherichia coli	1.17.4.1	A	LEU234:A	234	0.633		1	58/58	S,T,N,E,V,M,R,I,L
2R1R	P00452	RIR1_ECOLI	Escherichia coli	1.17.4.1	A	ASP235:A	235	0.295		1	58/58	F,S,T,N,K,Y,E,V,Q,D,G,L
2R1R	P00452	RIR1_ECOLI	Escherichia coli	1.17.4.1	A	ILE237:A	237	0.929		1	57/58	A,F,T,I,L,V
2R1R	P00452	RIR1_ECOLI	Escherichia coli	1.17.4.1	A	ILE261:A	261	0.727		1	58/58	A,F,T,C,I,L,Y,V
2R1R	P00452	RIR1_ECOLI	Escherichia coli	1.17.4.1	A	ARG262:A	262	0.933		1	58/58	S,A,N,H,Q,D,R,G
2R1R	P00452	RIR1_ECOLI	Escherichia coli	1.17.4.1	A	PRO267:A	267	0.145		1	47/58	S,F,A,W,N,K,P,Y,E,V,H,Q,L
2R1R	P00452	RIR1_ECOLI	Escherichia coli	1.17.4.1	A	ILE268:A	268	0.95		1	48/58	A,I,Y,L,V
2R1R	P00452	RIR1_ECOLI	Escherichia coli	1.17.4.1	A	ARG269:A	269	0.468		1	47/58	A,S,T,K,H,M,D,C,R,G
2R1R	P00452	RIR1_ECOLI	Escherichia coli	1.17.4.1	A	GLY270:A	270	0.474		1	45/58	S,F,M,N,D,R,K,G
2R1R	P00452	RIR1_ECOLI	Escherichia coli	1.17.4.1	A	ALA273:A	273	0.593		1	51/58	H,A,T,D,N,G,L,V
2R1R	P00452	RIR1_ECOLI	Escherichia coli	1.17.4.1	A	PHE274:A	274	0.179		1	53/58	F,A,T,N,K,E,Q,D,C,I,R,G,L
2R1R	P00452	RIR1_ECOLI	Escherichia coli	1.17.4.1	A	HIS275:A	275	0.845		1	53/58	H,S,A,T,K,P,V
2R1R	P00452	RIR1_ECOLI	Escherichia coli	1.17.4.1	A	THR276:A	276	0.781		1	53/58	A,S,Q,T,N,R,K,G,L
2R1R	P00452	RIR1_ECOLI	Escherichia coli	1.17.4.1	A	GLY277:A	277	0.916		1	53/58	S,T,D,G
2R1R	P00452	RIR1_ECOLI	Escherichia coli	1.17.4.1	A	PHE281:A	281	0.439		1	57/58	F,A,W,Y,V,M,C,I,L
2VD4	P43889	GLMU_HAEIN	Haemophilus influenzae	2.7.7.23	A	VAL131:A	131	0.594		1	157/157	S,F,A,T,E,V,M,C,D,I,L
2VD4	P43889	GLMU_HAEIN	Haemophilus influenzae	2.7.7.23	A	LEU133:A	133	0.343		1	157/157	A,F,T,K,P,V,Q,M,I,L
2VD4	P43889	GLMU_HAEIN	Haemophilus influenzae	2.7.7.23	A	ASN135:A	135	0.455		1	157/157	H,Q,N,D,I,E
2VD4	P43889	GLMU_HAEIN	Haemophilus influenzae	2.7.7.23	A	TYR139:A	139	0.737	1	1	157/157	M,L,Y
2VD4	P43889	GLMU_HAEIN	Haemophilus influenzae	2.7.7.23	A	VAL168:A	168	0.493		1	157/157	A,F,T,V,M,C,I,G
2VD4	P43889	GLMU_HAEIN	Haemophilus influenzae	2.7.7.23	A	ASN169:A	169	0.884		1	157/157	S,N,Y
2VD4	P43889	GLMU_HAEIN	Haemophilus influenzae	2.7.7.23	A	THR170:A	170	0.765		1	157/157	S,A,T,P,V
2VD4	P43889	GLMU_HAEIN	Haemophilus influenzae	2.7.7.23	A	GLY171:A	171	0.902		1	157/157	A,G
2VD4	P43889	GLMU_HAEIN	Haemophilus influenzae	2.7.7.23	A	VAL220:A	220	0.084		1	157/157	S,F,A,T,N,K,P,Y,E,V,Q,M,D,C,I,G,L
2VD4	P43889	GLMU_HAEIN	Haemophilus influenzae	2.7.7.23	A	MET221:A	221	0.163		1	157/157	A,S,F,W,T,N,Y,E,V,H,Q,M,D,I,R,G,L
2VD4	P43889	GLMU_HAEIN	Haemophilus influenzae	2.7.7.23	A	VAL223:A	223	0.572		1	157/157	S,A,M,T,I,L,V
2VD4	P43889	GLMU_HAEIN	Haemophilus influenzae	2.7.7.23	A	GLU224:A	224	0.291		1	157/157	A,S,T,N,E,Y,V,H,Q,M,D,I,L
2VD4	P43889	GLMU_HAEIN	Haemophilus influenzae	2.7.7.23	A	GLY225:A	225	0.902		1	157/157	A,G
2VD4	P43889	GLMU_HAEIN	Haemophilus influenzae	2.7.7.23	A	ALA226:A	226	0.642		1	157/157	A,I,V
2VD4	P43889	GLMU_HAEIN	Haemophilus influenzae	2.7.7.23	A	GLN231:A	231	0.794	1	1	157/157	A,Q,M,D,E
2VD4	P43889	GLMU_HAEIN	Haemophilus influenzae	2.7.7.23	A	LEU232:A	232	0.805		1	157/157	Q,M,L
2VD4	P43889	GLMU_HAEIN	Haemophilus influenzae	2.7.7.23	A	ALA234:A	234	0.141		1	157/157	S,A,T,N,K,Y,E,V,Q,D,I,R,G,L
2VD4	P43889	GLMU_HAEIN	Haemophilus influenzae	2.7.7.23	A	LEU235:A	235	0.704		1	157/157	A,C,I,R,L,V
2VD4	P43889	GLMU_HAEIN	Haemophilus influenzae	2.7.7.23	A	TYR139:A	139	0.737	1	1	157/157	M,L,Y
2VD4	P43889	GLMU_HAEIN	Haemophilus influenzae	2.7.7.23	A	ASN227:A	227	0.998	1		157/157	N
2VD4	P43889	GLMU_HAEIN	Haemophilus influenzae	2.7.7.23	A	ASN228:A	228	0.735	1		157/157	S,T,D,N
2VD4	P43889	GLMU_HAEIN	Haemophilus influenzae	2.7.7.23	A	GLN231:A	231	0.794	1	1	157/157	A,Q,M,D,E
2VGI	P30613	KPYR_HUMAN	Homo Sapiens	2.7.1.40	A	THR452:A	452	0.331		1	71/73	S,A,T,W,P,E,V,Q,M,D,R,G,L
2VGI	P30613	KPYR_HUMAN	Homo Sapiens	2.7.1.40	A	LEU474:A	474	0.338		1	73/73	A,F,W,P,Y,M,D,I,L
2VGI	P30613	KPYR_HUMAN	Homo Sapiens	2.7.1.40	A	THR475:A	475	0.892		1	73/73	S,T
2VGI	P30613	KPYR_HUMAN	Homo Sapiens	2.7.1.40	A	THR476:A	476	0.302		1	73/73	S,T,N,K,Y,E,V,H,Q,M,I,R,L
2VGI	P30613	KPYR_HUMAN	Homo Sapiens	2.7.1.40	A	THR477:A	477	0.667		1	73/73	S,T,D,N,K,G
2VGI	P30613	KPYR_HUMAN	Homo Sapiens	2.7.1.40	A	GLY478:A	478	0.898		1	73/73	I,G,L
2VGI	P30613	KPYR_HUMAN	Homo Sapiens	2.7.1.40	A	ARG479:A	479	0.289		1	73/73	A,F,S,T,N,K,Y,E,H,D,R,G
2VGI	P30613	KPYR_HUMAN	Homo Sapiens	2.7.1.40	A	SER480:A	480	0.76		1	73/73	S,F,T,E,M,R,G,L
2VGI	P30613	KPYR_HUMAN	Homo Sapiens	2.7.1.40	A	ALA481:A	481	0.722		1	73/73	S,A,T,P,I,V
2VGI	P30613	KPYR_HUMAN	Homo Sapiens	2.7.1.40	A	ARG498:A	498	0.473		1	73/73	F,A,S,T,N,K,P,V,Q,R
2VGI	P30613	KPYR_HUMAN	Homo Sapiens	2.7.1.40	A	TRP525:A	525	0.05		1	73/73	F,S,W,T,N,K,P,Y,E,H,M,D,I,G
2VGI	P30613	KPYR_HUMAN	Homo Sapiens	2.7.1.40	A	ASP528:A	528	0.437		1	73/73	S,A,Q,T,D,N,R,P,G,E
2VGI	P30613	KPYR_HUMAN	Homo Sapiens	2.7.1.40	A	VAL529:A	529	0.471		1	71/73	A,F,T,N,K,E,Y,V,M,I,R,G,L
2VGI	P30613	KPYR_HUMAN	Homo Sapiens	2.7.1.40	A	ARG532:A	532	0.384		1	70/73	F,A,S,T,N,M,R,I,G,L
2VGI	P30613	KPYR_HUMAN	Homo Sapiens	2.7.1.40	A	VAL555:A	555	0.61		1	70/73	A,F,T,E,V,M,I,L
2VGI	P30613	KPYR_HUMAN	Homo Sapiens	2.7.1.40	A	THR556:A	556	0.684		1	70/73	F,H,S,A,Q,T,L
2VGI	P30613	KPYR_HUMAN	Homo Sapiens	2.7.1.40	A	GLY557:A	557	0.858		1	64/73	A,R,G
2VGI	P30613	KPYR_HUMAN	Homo Sapiens	2.7.1.40	A	TRP558:A	558	0.192		1	60/73	F,A,S,T,W,N,V,H,D,I,G
2VGI	P30613	KPYR_HUMAN	Homo Sapiens	2.7.1.40	A	ARG559:A	559	0.407		1	62/73	A,S,T,K,P,V,H,Q,I,R,L
2VGI	P30613	KPYR_HUMAN	Homo Sapiens	2.7.1.40	A	PRO560:A	560	0.116		1	61/73	A,F,S,T,K,P,E,Y,V,H,Q,M,I,R,G
2VGI	P30613	KPYR_HUMAN	Homo Sapiens	2.7.1.40	A	GLY561:A	561	0.38		1	60/73	A,S,F,T,N,P,K,E,V,G
2VGI	P30613	KPYR_HUMAN	Homo Sapiens	2.7.1.40	A	SER562:A	562	0.141		1	65/73	S,A,F,T,K,P,E,V,Q,M,R,I,L
2VGI	P30613	KPYR_HUMAN	Homo Sapiens	2.7.1.40	A	GLY563:A	563	0.758		1	65/73	Q,T,K,R,G,E
2VGI	P30613	KPYR_HUMAN	Homo Sapiens	2.7.1.40	A	TYR564:A	564	0.268		1	64/73	F,A,S,T,W,N,K,Y,E,H,Q,D,R,G
2VGI	P30613	KPYR_HUMAN	Homo Sapiens	2.7.1.40	A	THR565:A	565	0.885		1	64/73	A,S,T,P
2VGI	P30613	KPYR_HUMAN	Homo Sapiens	2.7.1.40	A	ARG116:A	116	0.987	1		72/73	R
2VGI	P30613	KPYR_HUMAN	Homo Sapiens	2.7.1.40	A	ASN118:A	118	0.995	1		72/73	N
2VGI	P30613	KPYR_HUMAN	Homo Sapiens	2.7.1.40	A	SER120:A	120	0.909	1		72/73	S,A,C
2VGI	P30613	KPYR_HUMAN	Homo Sapiens	2.7.1.40	A	ASP156:A	156	0.987	1		73/73	D
2VGI	P30613	KPYR_HUMAN	Homo Sapiens	2.7.1.40	A	THR157:A	157	0.928	1		73/73	T,I,L
2VGI	P30613	KPYR_HUMAN	Homo Sapiens	2.7.1.40	A	GLU161:A	161	0.864	1		73/73	S,K,R,E
2VGI	P30613	KPYR_HUMAN	Homo Sapiens	2.7.1.40	A	ARG163:A	163	0.923	1		73/73	H,I,R
2VGI	P30613	KPYR_HUMAN	Homo Sapiens	2.7.1.40	A	SER286:A	286	1	1		73/73	S
2VGI	P30613	KPYR_HUMAN	Homo Sapiens	2.7.1.40	A	PHE287:A	287	0.919	1		73/73	F,L
2VGI	P30613	KPYR_HUMAN	Homo Sapiens	2.7.1.40	A	LYS313:A	313	0.966	1		73/73	K
2VGI	P30613	KPYR_HUMAN	Homo Sapiens	2.7.1.40	A	ILE314:A	314	0.913	1		73/73	I,L,V
2VGI	P30613	KPYR_HUMAN	Homo Sapiens	2.7.1.40	A	GLU315:A	315	0.972	1		73/73	E
2VGI	P30613	KPYR_HUMAN	Homo Sapiens	2.7.1.40	A	MET334:A	334	0.932	1		73/73	M,I,V
2VGI	P30613	KPYR_HUMAN	Homo Sapiens	2.7.1.40	A	VAL335:A	335	0.862	1		73/73	I,V
2VGI	P30613	KPYR_HUMAN	Homo Sapiens	2.7.1.40	A	ALA336:A	336	0.995	1		73/73	A
2VGI	P30613	KPYR_HUMAN	Homo Sapiens	2.7.1.40	A	ARG337:A	337	0.987	1		73/73	R
2VGI	P30613	KPYR_HUMAN	Homo Sapiens	2.7.1.40	A	GLY338:A	338	0.957	1		73/73	G
2VGI	P30613	KPYR_HUMAN	Homo Sapiens	2.7.1.40	A	ASP339:A	339	0.987	1		73/73	D
2VGI	P30613	KPYR_HUMAN	Homo Sapiens	2.7.1.40	A	LEU340:A	340	0.877	1		73/73	M,L
2VGI	P30613	KPYR_HUMAN	Homo Sapiens	2.7.1.40	A	ALA370:A	370	0.995	1		73/73	A
2VGI	P30613	KPYR_HUMAN	Homo Sapiens	2.7.1.40	A	THR371:A	371	0.963	1		73/73	S,T
2VGI	P30613	KPYR_HUMAN	Homo Sapiens	2.7.1.40	A	MET403:A	403	0.93	1		73/73	M,W,L
2VGI	P30613	KPYR_HUMAN	Homo Sapiens	2.7.1.40	A	SER405:A	405	0.94	1		73/73	S,T
3BEO	Q9Y223	GLCNE_HUMAN	Homo Sapiens	5.1.3.14	A	THR13:A	13	0.714		1	17/162	H,A,T,I,G,L
3BEO	Q9Y223	GLCNE_HUMAN	Homo Sapiens	5.1.3.14	A	ARG14:A	14	0.789	1	1	17/162	H,A,R,V
3BEO	Q9Y223	GLCNE_HUMAN	Homo Sapiens	5.1.3.14	A	PRO15:A	15	0.779	1	1	17/162	M,P,R,V
3BEO	Q9Y223	GLCNE_HUMAN	Homo Sapiens	5.1.3.14	A	GLN43:A	43	0.725		1	22/162	A,S,Y,E,H,Q,D,G
3BEO	Q9Y223	GLCNE_HUMAN	Homo Sapiens	5.1.3.14	A	HIS44:A	44	0.64	1	1	22/162	N,K,P,Y,V,H,Q,M,I
3BEO	Q9Y223	GLCNE_HUMAN	Homo Sapiens	5.1.3.14	A	ARG45:A	45	0.701		1	22/162	S,H,T,N,D,I,R,L
3BEO	Q9Y223	GLCNE_HUMAN	Homo Sapiens	5.1.3.14	A	GLN46:A	46	0.434		1	22/162	F,Q,I,G,L,E,Y,V
3BEO	Q9Y223	GLCNE_HUMAN	Homo Sapiens	5.1.3.14	A	MET47:A	47	0.573	1	1	22/162	N,P,E,V,H,M,C,R
3BEO	Q9Y223	GLCNE_HUMAN	Homo Sapiens	5.1.3.14	A	LEU48:A	48	0.73		1	22/162	S,M,K,R,I,E,L
3BEO	Q9Y223	GLCNE_HUMAN	Homo Sapiens	5.1.3.14	A	MET66:A	66	0.452		1	27/162	S,T,N,P,V,M,D,I,G,L
3BEO	Q9Y223	GLCNE_HUMAN	Homo Sapiens	5.1.3.14	A	LYS67:A	67	0.313		1	27/162	A,W,T,K,E,Q,M,R,I,L
3BEO	Q9Y223	GLCNE_HUMAN	Homo Sapiens	5.1.3.14	A	ASP68:A	68	0.271		1	27/162	A,S,T,P,K,E,Q,D,R,G
3BEO	Q9Y223	GLCNE_HUMAN	Homo Sapiens	5.1.3.14	A	ARG69:A	69	0.599		1	27/162	A,S,N,K,E,H,R,G,L
3BEO	Q9Y223	GLCNE_HUMAN	Homo Sapiens	5.1.3.14	A	GLN70:A	70	0.463		1	28/162	S,F,A,T,V,Q,M,D,I,G,L
3BEO	Q9Y223	GLCNE_HUMAN	Homo Sapiens	5.1.3.14	A	THR71:A	71	0.329		1	28/162	S,A,T,N,K,H,M,D,R,I,G,L
3BEO	Q9Y223	GLCNE_HUMAN	Homo Sapiens	5.1.3.14	A	LEU72:A	72	0.664		1	28/162	S,A,T,N,H,M,D,I,L
3BEO	Q9Y223	GLCNE_HUMAN	Homo Sapiens	5.1.3.14	A	ILE75:A	75	0.567		1	35/162	A,S,T,N,K,V,Q,I,R,L
3BEO	Q9Y223	GLCNE_HUMAN	Homo Sapiens	5.1.3.14	A	ASP100:A	100	0.979	1	1	162/162	S,N,D,P,G
3BEO	Q9Y223	GLCNE_HUMAN	Homo Sapiens	5.1.3.14	A	THR101:A	101	0.92	1	1	19/162	H,T,R
3BEO	Q9Y223	GLCNE_HUMAN	Homo Sapiens	5.1.3.14	A	THR102:A	102	0.869		1	162/162	S,F,T,N,K,Y,V,M,I
3BEO	Q9Y223	GLCNE_HUMAN	Homo Sapiens	5.1.3.14	A	THR103:A	103	0.891		1	162/162	S,A,T,P,Y,E,V,H,D,I,G
3BEO	Q9Y223	GLCNE_HUMAN	Homo Sapiens	5.1.3.14	A	TYR134:A	134	0.549		1	156/162	A,S,F,T,W,N,K,Y,V,M,D,R,I,L
3BEO	Q9Y223	GLCNE_HUMAN	Homo Sapiens	5.1.3.14	A	PRO135:A	135	0.797		1	162/162	F,A,S,T,P,K,V,M,D,R,I,L
3BEO	Q9Y223	GLCNE_HUMAN	Homo Sapiens	5.1.3.14	A	GLU136:A	136	0.936		1	162/162	M,C,G,L,E,Y
3BEO	Q9Y223	GLCNE_HUMAN	Homo Sapiens	5.1.3.14	A	ASN139:A	139	0.966		1	162/162	T,N,D,K,R,L,V
3BEO	Q9Y223	GLCNE_HUMAN	Homo Sapiens	5.1.3.14	A	HIS209:A	209	0.976	1	1	162/162	H,Q,R,G,E
3BEO	Q9Y223	GLCNE_HUMAN	Homo Sapiens	5.1.3.14	A	ARG210:A	210	0.987	1	1	162/162	A,S,H,T,R,I,G
3BEO	Q9Y223	GLCNE_HUMAN	Homo Sapiens	5.1.3.14	A	ARG211:A	211	0.771		1	162/162	F,S,A,T,P,E,V,H,Q,R,G,L
3BEO	Q9Y223	GLCNE_HUMAN	Homo Sapiens	5.1.3.14	A	HIS242:A	242	0.99	1	1	159/162	H,R,G
3BEO	Q9Y223	GLCNE_HUMAN	Homo Sapiens	5.1.3.14	A	MET243:A	243	0.391		1	33/162	S,N,K,P,M,D,R,L
3BEO	Q9Y223	GLCNE_HUMAN	Homo Sapiens	5.1.3.14	A	ASN244:A	244	0.415		1	159/162	A,S,T,N,K,P,E,V,Q,D,I,R,G
3BEO	Q9Y223	GLCNE_HUMAN	Homo Sapiens	5.1.3.14	A	PRO245:A	245	0.332		1	162/162	S,F,A,T,N,P,K,E,Y,V,H,Q,D,I,R,G,L
3BEO	Q9Y223	GLCNE_HUMAN	Homo Sapiens	5.1.3.14	A	ARG14:A	14	0.789	1	1	17/162	H,A,R,V
3BEO	Q9Y223	GLCNE_HUMAN	Homo Sapiens	5.1.3.14	A	PRO15:A	15	0.779	1	1	17/162	M,P,R,V
3BEO	Q9Y223	GLCNE_HUMAN	Homo Sapiens	5.1.3.14	A	ILE18:A	18	0.859	1		17/162	A,F,I,L,V
3BEO	Q9Y223	GLCNE_HUMAN	Homo Sapiens	5.1.3.14	A	LYS19:A	19	0.752	1		18/162	A,T,I,K,G
3BEO	Q9Y223	GLCNE_HUMAN	Homo Sapiens	5.1.3.14	A	HIS44:A	44	0.64	1	1	22/162	N,K,P,Y,V,H,Q,M,I
3BEO	Q9Y223	GLCNE_HUMAN	Homo Sapiens	5.1.3.14	A	MET47:A	47	0.573	1	1	22/162	N,P,E,V,H,M,C,R
3BEO	Q9Y223	GLCNE_HUMAN	Homo Sapiens	5.1.3.14	A	ASP100:A	100	0.979	1	1	162/162	S,N,D,P,G
3BEO	Q9Y223	GLCNE_HUMAN	Homo Sapiens	5.1.3.14	A	THR101:A	101	0.92	1	1	19/162	H,T,R
3BEO	Q9Y223	GLCNE_HUMAN	Homo Sapiens	5.1.3.14	A	THR207:A	207	0.645	1		162/162	S,A,F,T,Y,V,M,I,L
3BEO	Q9Y223	GLCNE_HUMAN	Homo Sapiens	5.1.3.14	A	HIS209:A	209	0.976	1	1	162/162	H,Q,R,G,E
3BEO	Q9Y223	GLCNE_HUMAN	Homo Sapiens	5.1.3.14	A	ARG210:A	210	0.987	1	1	162/162	A,S,H,T,R,I,G
3BEO	Q9Y223	GLCNE_HUMAN	Homo Sapiens	5.1.3.14	A	PRO240:A	240	0.808	1		162/162	A,S,Q,P,I,L,V
3BEO	Q9Y223	GLCNE_HUMAN	Homo Sapiens	5.1.3.14	A	HIS242:A	242	0.99	1	1	159/162	H,R,G
3BEO	Q9Y223	GLCNE_HUMAN	Homo Sapiens	5.1.3.14	A	GLU265:A	265	0.073	1		162/162	F,A,S,W,T,N,K,Y,E,V,H,Q,M,D,C,I,R,L
3BEO	Q9Y223	GLCNE_HUMAN	Homo Sapiens	5.1.3.14	A	PRO266:A	266	0.629	1		159/162	F,A,S,T,P,V,Q,M,C,I,L
3BEO	Q9Y223	GLCNE_HUMAN	Homo Sapiens	5.1.3.14	A	LEU267:A	267	0.252	1		161/162	A,S,F,T,N,K,Y,E,V,Q,D,I,R,G,L
3BEO	Q9Y223	GLCNE_HUMAN	Homo Sapiens	5.1.3.14	A	ASP268:A	268	0.57	1		161/162	A,S,T,N,P,K,E,H,Q,D,G
3BEO	Q9Y223	GLCNE_HUMAN	Homo Sapiens	5.1.3.14	A	VAL269:A	269	0.878	1		162/162	F,H,P,Y,V
3BEO	Q9Y223	GLCNE_HUMAN	Homo Sapiens	5.1.3.14	A	ILE270:A	270	0.771	1		162/162	S,A,F,T,E,V,M,I,L
3BEO	Q9Y223	GLCNE_HUMAN	Homo Sapiens	5.1.3.14	A	PHE272:A	272	0.928	1		161/162	F,M,T,I,P,L,V
3BEO	Q9Y223	GLCNE_HUMAN	Homo Sapiens	5.1.3.14	A	HIS273:A	273	0.495	1		161/162	S,A,T,N,K,P,E,V,H,Q,D,I,G,L
3BEO	Q9Y223	GLCNE_HUMAN	Homo Sapiens	5.1.3.14	A	THR284:A	284	0.784	1		162/162	F,A,S,T,H,C,I,G
3BEO	Q9Y223	GLCNE_HUMAN	Homo Sapiens	5.1.3.14	A	ASP285:A	285	0.974	1		162/162	S,D,N,K,R,G
3BEO	Q9Y223	GLCNE_HUMAN	Homo Sapiens	5.1.3.14	A	SER286:A	286	0.894	1		162/162	A,S,N,P,G,E
3BEO	Q9Y223	GLCNE_HUMAN	Homo Sapiens	5.1.3.14	A	GLY287:A	287	0.998	1		162/162	S,G
3BEO	Q9Y223	GLCNE_HUMAN	Homo Sapiens	5.1.3.14	A	GLY288:A	288	0.955	1		162/162	A,S,F,C,P,G
3BEO	Q9Y223	GLCNE_HUMAN	Homo Sapiens	5.1.3.14	A	VAL289:A	289	0.746	1		162/162	A,S,T,N,V,M,C,I,G,L
3BEO	Q9Y223	GLCNE_HUMAN	Homo Sapiens	5.1.3.14	A	GLU292:A	292	1	1		162/162	D,E
3BEO	Q9Y223	GLCNE_HUMAN	Homo Sapiens	5.1.3.14	A	ARG309:A	309	0.96	1		160/162	A,W,T,R,I,G,V
3D2P	B4RNV7 (TremblID)	B4RNV7_NEIG2	Neisseria gonorrhoeae	2.3.1.1	A	TYR17:A	17	0.702		1	166/166	H,F,W,Y
3D2P	B4RNV7 (TremblID)	B4RNV7_NEIG2	Neisseria gonorrhoeae	2.3.1.1	A	MET21:A	21	0.642		1	166/166	H,F,M,L,Y
3D2P	B4RNV7 (TremblID)	B4RNV7_NEIG2	Neisseria gonorrhoeae	2.3.1.1	A	LYS201:A	201	0.833		1	166/166	N,R,K
3D2P	B4RNV7 (TremblID)	B4RNV7_NEIG2	Neisseria gonorrhoeae	2.3.1.1	A	GLU220:A	220	0.379		1	166/166	A,S,T,N,K,P,E,Y,V,H,Q,D,R
3D2P	B4RNV7 (TremblID)	B4RNV7_NEIG2	Neisseria gonorrhoeae	2.3.1.1	A	THR221:A	221	0.205		1	166/166	A,S,T,N,K,E,V,H,Q,D,R,G,L
3D2P	B4RNV7 (TremblID)	B4RNV7_NEIG2	Neisseria gonorrhoeae	2.3.1.1	A	ARG255:A	255	0.422		1	166/166	S,A,Q,T,N,K,R,G,Y
3D2P	B4RNV7 (TremblID)	B4RNV7_NEIG2	Neisseria gonorrhoeae	2.3.1.1	A	GLN257:A	257	0.772		1	166/166	S,T,Y,V,H,Q,M,I,L
3D2P	B4RNV7 (TremblID)	B4RNV7_NEIG2	Neisseria gonorrhoeae	2.3.1.1	A	ILE258:A	258	0.829		1	166/166	I,L,V
3D2P	B4RNV7 (TremblID)	B4RNV7_NEIG2	Neisseria gonorrhoeae	2.3.1.1	A	LEU259:A	259	0.37		1	166/166	I,L,V
3D2P	B4RNV7 (TremblID)	B4RNV7_NEIG2	Neisseria gonorrhoeae	2.3.1.1	A	GLN269:A	269	0.669		1	166/166	S,Q,T,I,L,V
3D2P	B4RNV7 (TremblID)	B4RNV7_NEIG2	Neisseria gonorrhoeae	2.3.1.1	A	GLU270:A	270	0.996		1	166/166	E
3D2P	B4RNV7 (TremblID)	B4RNV7_NEIG2	Neisseria gonorrhoeae	2.3.1.1	A	LEU271:A	271	0.451		1	166/166	F,M,T,I,L,V
3D2P	B4RNV7 (TremblID)	B4RNV7_NEIG2	Neisseria gonorrhoeae	2.3.1.1	A	PHE272:A	272	0.713		1	166/166	F,Y,L
3D2P	B4RNV7 (TremblID)	B4RNV7_NEIG2	Neisseria gonorrhoeae	2.3.1.1	A	THR273:A	273	0.908		1	166/166	S,T,L
3D2P	B4RNV7 (TremblID)	B4RNV7_NEIG2	Neisseria gonorrhoeae	2.3.1.1	A	ARG274:A	274	0.39		1	166/166	F,A,S,T,N,P,K,E,H,M,D,R,L
3D2P	B4RNV7 (TremblID)	B4RNV7_NEIG2	Neisseria gonorrhoeae	2.3.1.1	A	ASN275:A	275	0.126		1	165/166	S,A,T,N,K,E,V,H,Q,D,R,G,L
3D2P	B4RNV7 (TremblID)	B4RNV7_NEIG2	Neisseria gonorrhoeae	2.3.1.1	A	GLY276:A	276	0.941		1	166/166	A,P,G
3D2P	B4RNV7 (TremblID)	B4RNV7_NEIG2	Neisseria gonorrhoeae	2.3.1.1	A	ILE277:A	277	0.504		1	166/166	F,A,T,N,P,Y,V,I,G,L
3D2P	B4RNV7 (TremblID)	B4RNV7_NEIG2	Neisseria gonorrhoeae	2.3.1.1	A	GLY278:A	278	0.994		1	166/166	G
3D2P	B4RNV7 (TremblID)	B4RNV7_NEIG2	Neisseria gonorrhoeae	2.3.1.1	A	THR279:A	279	0.849		1	166/166	S,T
3D2P	B4RNV7 (TremblID)	B4RNV7_NEIG2	Neisseria gonorrhoeae	2.3.1.1	A	SER280:A	280	0.554		1	166/166	S,A,K,E,V,Q,M,R,I,L
3D2P	B4RNV7 (TremblID)	B4RNV7_NEIG2	Neisseria gonorrhoeae	2.3.1.1	A	PHE286:A	286	0.618		1	27/166	A,S,F,L
3D2P	B4RNV7 (TremblID)	B4RNV7_NEIG2	Neisseria gonorrhoeae	2.3.1.1	A	ASP334:A	334	0.785		1	27/166	D,E
3D2P	B4RNV7 (TremblID)	B4RNV7_NEIG2	Neisseria gonorrhoeae	2.3.1.1	A	LEU307:A	307	0.891	1		27/166	L
3D2P	B4RNV7 (TremblID)	B4RNV7_NEIG2	Neisseria gonorrhoeae	2.3.1.1	A	ILE312:A	312	0.719	1		27/166	T,I,L
3D2P	B4RNV7 (TremblID)	B4RNV7_NEIG2	Neisseria gonorrhoeae	2.3.1.1	A	ILE354:A	354	0.625	1		27/166	F,M,I,L
3D2P	B4RNV7 (TremblID)	B4RNV7_NEIG2	Neisseria gonorrhoeae	2.3.1.1	A	ALA355:A	355	0.954	1		27/166	A
3D2P	B4RNV7 (TremblID)	B4RNV7_NEIG2	Neisseria gonorrhoeae	2.3.1.1	A	CYS356:A	356	0.844	1		27/166	C
3D2P	B4RNV7 (TremblID)	B4RNV7_NEIG2	Neisseria gonorrhoeae	2.3.1.1	A	LEU357:A	357	0.524	1		27/166	L,V
3D2P	B4RNV7 (TremblID)	B4RNV7_NEIG2	Neisseria gonorrhoeae	2.3.1.1	A	ALA358:A	358	0.721	1		27/166	A,T,V
3D2P	B4RNV7 (TremblID)	B4RNV7_NEIG2	Neisseria gonorrhoeae	2.3.1.1	A	VAL359:A	359	0.706	1		27/166	I,V
3D2P	B4RNV7 (TremblID)	B4RNV7_NEIG2	Neisseria gonorrhoeae	2.3.1.1	A	ALA363:A	363	0.466	1		27/166	F,A,T,Y
3D2P	B4RNV7 (TremblID)	B4RNV7_NEIG2	Neisseria gonorrhoeae	2.3.1.1	A	GLN364:A	364	0.768	1		27/166	Q,R
3D2P	B4RNV7 (TremblID)	B4RNV7_NEIG2	Neisseria gonorrhoeae	2.3.1.1	A	ASP365:A	365	0.357	1		27/166	S,H,N,D,G
3D2P	B4RNV7 (TremblID)	B4RNV7_NEIG2	Neisseria gonorrhoeae	2.3.1.1	A	GLY366:A	366	0.521	1		27/166	A,S,T,G
3D2P	B4RNV7 (TremblID)	B4RNV7_NEIG2	Neisseria gonorrhoeae	2.3.1.1	A	GLY367:A	367	0.284	1		27/166	A,S,N,K,H,D,G,L
3D2P	B4RNV7 (TremblID)	B4RNV7_NEIG2	Neisseria gonorrhoeae	2.3.1.1	A	TYR368:A	368	0.627	1		27/166	D,R,Y
3D2P	B4RNV7 (TremblID)	B4RNV7_NEIG2	Neisseria gonorrhoeae	2.3.1.1	A	GLY369:A	369	0.873	1		27/166	G
3D2P	B4RNV7 (TremblID)	B4RNV7_NEIG2	Neisseria gonorrhoeae	2.3.1.1	A	GLU370:A	370	0.302	1		27/166	S,D,L,E,V
3D2P	B4RNV7 (TremblID)	B4RNV7_NEIG2	Neisseria gonorrhoeae	2.3.1.1	A	ARG371:A	371	0.077	1		27/166	A,E,V,H,Q,M,R,I,L
3D2P	B4RNV7 (TremblID)	B4RNV7_NEIG2	Neisseria gonorrhoeae	2.3.1.1	A	LEU391:A	391	0.891	1		27/166	L
3D2P	B4RNV7 (TremblID)	B4RNV7_NEIG2	Neisseria gonorrhoeae	2.3.1.1	A	SER392:A	392	0.816	1		27/166	S,T
3D2P	B4RNV7 (TremblID)	B4RNV7_NEIG2	Neisseria gonorrhoeae	2.3.1.1	A	ASN394:A	394	0.436	1		27/166	H,Q,N,R
3D2P	B4RNV7 (TremblID)	B4RNV7_NEIG2	Neisseria gonorrhoeae	2.3.1.1	A	THR395:A	395	0.822	1		27/166	S,T
3D2P	B4RNV7 (TremblID)	B4RNV7_NEIG2	Neisseria gonorrhoeae	2.3.1.1	A	GLY396:A	396	0.258	1		27/166	A,T,I,G,L,E,V
3D2P	B4RNV7 (TremblID)	B4RNV7_NEIG2	Neisseria gonorrhoeae	2.3.1.1	A	GLU397:A	397	0.658	1		27/166	H,Q,E
3D2P	B4RNV7 (TremblID)	B4RNV7_NEIG2	Neisseria gonorrhoeae	2.3.1.1	A	TRP398:A	398	0.776	1		27/166	W
3D2P	B4RNV7 (TremblID)	B4RNV7_NEIG2	Neisseria gonorrhoeae	2.3.1.1	A	PHE399:A	399	0.864	1		27/166	F
3D2P	B4RNV7 (TremblID)	B4RNV7_NEIG2	Neisseria gonorrhoeae	2.3.1.1	A	GLU401:A	401	0.77	1		27/166	K,E
3D2P	B4RNV7 (TremblID)	B4RNV7_NEIG2	Neisseria gonorrhoeae	2.3.1.1	A	ARG402:A	402	0.675	1		27/166	H,Q,R
3F3V	P00523	SRC_CHICK	Gallus gallus	2.7.10.2	A	LEU273:A	273	0.685		1	129/129	I,L,V
3F3V	P00523	SRC_CHICK	Gallus gallus	2.7.10.2	A	VAL281:A	281	0.997		1	129/129	V
3F3V	P00523	SRC_CHICK	Gallus gallus	2.7.10.2	A	ALA293:A	293	0.997		1	129/129	A
3F3V	P00523	SRC_CHICK	Gallus gallus	2.7.10.2	A	LYS295:A	295	0.962		1	129/129	K
3F3V	P00523	SRC_CHICK	Gallus gallus	2.7.10.2	A	GLN309:A	309	0.267		1	129/129	A,S,T,N,K,E,Q,M,D,C,R,G,L
3F3V	P00523	SRC_CHICK	Gallus gallus	2.7.10.2	A	GLU310:A	310	0.969		1	129/129	E
3F3V	P00523	SRC_CHICK	Gallus gallus	2.7.10.2	A	ALA311:A	311	0.734		1	129/129	F,A,M,T,I,G,L,V
3F3V	P00523	SRC_CHICK	Gallus gallus	2.7.10.2	A	VAL313:A	313	0.506		1	129/129	A,M,T,C,I,L,V
3F3V	P00523	SRC_CHICK	Gallus gallus	2.7.10.2	A	MET314:A	314	0.811		1	129/129	M,I,L
3F3V	P00523	SRC_CHICK	Gallus gallus	2.7.10.2	A	LEU317:A	317	0.576		1	129/129	F,M,C,I,Y,L,V
3F3V	P00523	SRC_CHICK	Gallus gallus	2.7.10.2	A	LEU322:A	322	0.716		1	129/129	I,L,V
3F3V	P00523	SRC_CHICK	Gallus gallus	2.7.10.2	A	VAL323:A	323	0.692		1	129/129	A,M,C,I,L,V
3F3V	P00523	SRC_CHICK	Gallus gallus	2.7.10.2	A	THR338:A	338	0.737		1	129/129	F,Q,M,T,I,L,V
3F3V	P00523	SRC_CHICK	Gallus gallus	2.7.10.2	A	GLU339:A	339	0.923		1	129/129	Q,P,E
3F3V	P00523	SRC_CHICK	Gallus gallus	2.7.10.2	A	TYR340:A	340	0.369		1	129/129	H,F,C,L,Y
3F3V	P00523	SRC_CHICK	Gallus gallus	2.7.10.2	A	MET341:A	341	0.779		1	129/129	A,T,Y,V,M,C,I,L
3F3V	P00523	SRC_CHICK	Gallus gallus	2.7.10.2	A	SER342:A	342	0.225		1	129/129	S,A,T,N,P,K,E,H,Q,C,I,R,G,L
3F3V	P00523	SRC_CHICK	Gallus gallus	2.7.10.2	A	LYS343:A	343	0.372		1	129/129	N,K,Y,H,Q,R,G,L
3F3V	P00523	SRC_CHICK	Gallus gallus	2.7.10.2	A	GLY344:A	344	0.93		1	129/129	C,G
3F3V	P00523	SRC_CHICK	Gallus gallus	2.7.10.2	A	CYS345:A	345	0.622		1	129/129	S,A,N,C,D,K,E
3F3V	P00523	SRC_CHICK	Gallus gallus	2.7.10.2	A	VAL377:A	377	0.867		1	129/129	M,I,L,V
3F3V	P00523	SRC_CHICK	Gallus gallus	2.7.10.2	A	TYR382:A	382	0.481		1	129/129	S,F,C,I,Y,L,V
3F3V	P00523	SRC_CHICK	Gallus gallus	2.7.10.2	A	VAL383:A	383	0.751		1	129/129	I,L,V
3F3V	P00523	SRC_CHICK	Gallus gallus	2.7.10.2	A	HIS384:A	384	0.99		1	129/129	H
3F3V	P00523	SRC_CHICK	Gallus gallus	2.7.10.2	A	LEU393:A	393	0.913		1	129/129	M,L
3F3V	P00523	SRC_CHICK	Gallus gallus	2.7.10.2	A	VAL402:A	402	0.79		1	129/129	I,L,V
3F3V	P00523	SRC_CHICK	Gallus gallus	2.7.10.2	A	ALA403:A	403	0.706		1	129/129	S,A,T,C,G
3F3V	P00523	SRC_CHICK	Gallus gallus	2.7.10.2	A	ASP404:A	404	0.986		1	129/129	D
3F3V	P00523	SRC_CHICK	Gallus gallus	2.7.10.2	A	PHE405:A	405	0.944		1	129/129	F
3F3V	P00523	SRC_CHICK	Gallus gallus	2.7.10.2	A	GLY406:A	406	0.955		1	129/129	G
3H30	P68400	CSK21_HUMAN	Homo Sapiens	2.7.11.1	A	GLN36:A	36	0.463		1	147/158	S,A,T,P,V,Q,M,D,I,R,G,L
3H30	P68400	CSK21_HUMAN	Homo Sapiens	2.7.11.1	A	ASP37:A	37	0.136		1	153/158	A,S,T,N,P,K,E,V,Q,D,R,I
3H30	P68400	CSK21_HUMAN	Homo Sapiens	2.7.11.1	A	TYR39:A	39	0.757		1	156/158	F,L,Y
3H30	P68400	CSK21_HUMAN	Homo Sapiens	2.7.11.1	A	GLN40:A	40	0.145		1	157/158	A,S,T,N,K,E,V,H,Q,M,D,I,R,L
3H30	P68400	CSK21_HUMAN	Homo Sapiens	2.7.11.1	A	LEU41:A	41	0.37		1	157/158	S,A,N,K,P,E,V,Q,M,D,R,I,G,L
3H30	P68400	CSK21_HUMAN	Homo Sapiens	2.7.11.1	A	VAL42:A	42	0.289		1	157/158	S,P,K,E,V,Q,M,I,R,L
3H30	P68400	CSK21_HUMAN	Homo Sapiens	2.7.11.1	A	VAL67:A	67	0.706		1	158/158	M,I,L,V
3H30	P68400	CSK21_HUMAN	Homo Sapiens	2.7.11.1	A	LYS68:A	68	0.97		1	158/158	K
3H30	P68400	CSK21_HUMAN	Homo Sapiens	2.7.11.1	A	ILE69:A	69	0.82		1	158/158	R,K,I,E,V
3H30	P68400	CSK21_HUMAN	Homo Sapiens	2.7.11.1	A	VAL101:A	101	0.4		1	158/158	F,T,K,E,Y,V,Q,M,C,I,L
3H30	P68400	CSK21_HUMAN	Homo Sapiens	2.7.11.1	A	LYS102:A	102	0.397		1	158/158	A,S,F,T,P,K,E,V,H,Q,M,C,R,I,G,L
3H30	P68400	CSK21_HUMAN	Homo Sapiens	2.7.11.1	A	ASP103:A	103	0.217		1	83/158	F,A,T,N,P,K,Y,V,H,Q,D,R,I,G,L
3H30	P68400	CSK21_HUMAN	Homo Sapiens	2.7.11.1	A	PRO104:A	104	0.13		1	107/158	S,A,T,N,K,P,Y,E,Q,M,D,R,G
3H30	P68400	CSK21_HUMAN	Homo Sapiens	2.7.11.1	A	VAL105:A	105	0.091		1	158/158	S,T,N,K,Y,E,V,Q,C,A,P,H,D,I,R,G
3H30	P68400	CSK21_HUMAN	Homo Sapiens	2.7.11.1	A	THR108:A	108	0.469		1	158/158	A,S,T,N,K,E,V,H,Q,C,D,R,I,G,L
3H30	P68400	CSK21_HUMAN	Homo Sapiens	2.7.11.1	A	PRO109:A	109	0.688		1	158/158	F,M,C,I,P,L,V
3H30	P68400	CSK21_HUMAN	Homo Sapiens	2.7.11.1	A	ALA110:A	110	0.694		1	158/158	H,F,A,S,T,N,I,Y,V
3H30	P68400	CSK21_HUMAN	Homo Sapiens	2.7.11.1	A	LEU111:A	111	0.613		1	158/158	F,M,I,L,V
3H30	P68400	CSK21_HUMAN	Homo Sapiens	2.7.11.1	A	VAL112:A	112	0.781		1	158/158	S,A,I,V
3I0R	Q99FA4 (TremblID)	Q99FA4_9HIV1	Human immunodeficiency virus 1	2.7.7.49	A	PRO95:A	95	0.977		1	89/90	Q,P
3I0R	Q99FA4 (TremblID)	Q99FA4_9HIV1	Human immunodeficiency virus 1	2.7.7.49	A	LEU100:A	100	0.652		1	89/90	F,I,L,V
3I0R	Q99FA4 (TremblID)	Q99FA4_9HIV1	Human immunodeficiency virus 1	2.7.7.49	A	LYS101:A	101	0.406		1	89/90	F,A,S,K,P,Y,E,V,Q,I,R,G
3I0R	Q99FA4 (TremblID)	Q99FA4_9HIV1	Human immunodeficiency virus 1	2.7.7.49	A	LYS102:A	102	0.31		1	89/90	S,T,N,K,P,E,Q,M,D,R,I,G,L
3I0R	Q99FA4 (TremblID)	Q99FA4_9HIV1	Human immunodeficiency virus 1	2.7.7.49	A	LYS103:A	103	0.246		1	89/90	A,S,T,N,K,H,Q,M,D,C,R,G
3I0R	Q99FA4 (TremblID)	Q99FA4_9HIV1	Human immunodeficiency virus 1	2.7.7.49	A	LYS104:A	104	0.196		1	89/90	S,W,T,N,P,K,E,Y,H,Q,R,L
[truncated: 36 more rows]
