# Supplementary material for: Rational Engineering of Enzyme Allosteric Regulation through Sequence Evolution Analysis
Source: PLoS Comput Biol. 2012 Jul 12;8(7):e1002612. doi: 10.1371/journal.pcbi.1002612 (PMC3395594; doi:10.1371/journal.pcbi.1002612)
Supplement: Table S2 — Distributions of enzyme classes in our dataset and the entire ENZYME database. (XLS) [file pcbi.1002612.s006.xls]

## Sheet: Table S2
Table S2. Distributions of enzyme classes in our dataset and the entire ENZYME database
	Number of proteins		Fraction of proteins
Enzyme Classes	In this study	ENZYME database	In this study	ENZYME database
Oxidoreductases	8	35631	0.148148	0.146175
Transferases	26	83783	0.481481	0.343717
Hydrolases	8	58546	0.148148	0.240183
Lyases	7	22875	0.12963	0.0938438
Isomerases	2	13279	0.037037	0.0544766
Ligases	3	29642	0.0555556	0.121605
			Pearson r	0.892739
			P-value	0.0166403
