# Supplementary material for: Rational Engineering of Enzyme Allosteric Regulation through Sequence Evolution Analysis
Source: PLoS Comput Biol. 2012 Jul 12;8(7):e1002612. doi: 10.1371/journal.pcbi.1002612 (PMC3395594; doi:10.1371/journal.pcbi.1002612)
Supplement: Table S4 — Conservation scores of catalytic, allosteric, and surface residues of ATCase, GPb, and FBPase. (XLS) [file pcbi.1002612.s008.xls]

## Sheet: Table S4
Table S4. Conservation scores of catalytic, allosteric, and surface residues of ATCase, GPb, and FBPase
Conservation scores of catalytic, allosteric, and surface residues of ATCase
PDB	Chain	Type	Residue	Conservation Score	Surface Area (Å2)
2FZC	A	Catalytic Site	E50	0.874	57.73
			A51	0.447	51.54
			S52	1	17.37
			T53	0.965	84.29
			R54	0.984	131
			T55	0.997	14.75
			R105	0.984	28.81
			A127	0.774	0
			H134	0.991	8.61
			Q137	0.984	17.28
			R167	0.952	39.11
			T168	0.832	14.87
			R229	0.962	95.77
			P266	0.926	32.22
			L267	0.881	26.76
			P268	0.958	61.16
2FZC	B	Allosteric Site	T2	0.132	94.58
			H3	0.27	21.76
			E10	0.593	12.48
			A11	0.672	33.72
			I12	0.915	8.77
			K13	0.211	73.67
			V17	0.915	13.92
			D19	0.987	28.15
			H20	0.994	66.21
			E52	0.316	111.27
			K56	0.981	25.47
			L58	0.744	9.28
			K60	0.902	6.26
			T82	0.856	13.14
			N84	0.849	10.03
			I86	0.79	11.89
			N88	0.448	119.15
			Y89	0.468	120.04
			E90	0.099	116.42
			V91	0.783	61.3
			K94	0.981	150.23
2FZC	A	Surface	A1	0.696	92.57
			P3	0.36	94.21
			Y5	0.14	74.56
			Q6	0.24	70.07
			K7	0.454	84.91
			H8	0.661	61.53
			N13	0.091	76.82
			D14	0.635	76.58
			S16	0.308	54.54
			R17	0.104	79.17
			D18	0.156	106.67
			N21	0.033	54.73
			K29	0.043	76.13
			K31	0.612	77.49
			A32	0.039	73.66
			N33	0.111	102.08
			P34	0.23	95.99
			Q35	0.085	54.55
			P36	0.101	80.17
			E37	0.094	105.56
			K40	0.153	109.5
			H41	0.56	158.21
			K42	0.732	65.12
			V43	0.615	50.73
			R56	0.871	57.23
			L57	0.606	96.4
			T61	0.518	50.69
			H64	0.188	104.73
			R65	0.767	153.1
			S69	0.311	59.85
			V71	0.437	77.03
			G72	0.431	51.97
			F73	0.408	51.9
			D75	0.279	96
			A77	0.301	89.06
			N78	0.67	78.82
			S80	0.933	62.17
			L81	0.7	55.02
			K83	0.366	118.32
			K84	0.816	133.88
			G85	0.868	57.66
			E86	0.971	64.05
			D90	0.984	71.38
			V94	0.742	59.89
			T97	0.577	110.27
			Y98	0.797	141.05
			D100	0.907	51.41
			P107	0.191	54.74
			E117	0.078	71.11
			F118	0.153	61.23
			G120	0.169	63.98
			N121	0.143	121.97
			S131	0.554	54.92
			E147	0.729	77.07
			G150	0.418	63.12
			R151	0.052	99.49
			N154	0.259	88.96
			H156	0.266	53.17
			K164	0.677	81.86
			Y165	0.761	87.92
			D180	0.098	84.01
			R183	0.185	86.28
			D190	0.081	140.95
			A191	0.337	52.25
			Q196	0.023	111.27
			Y197	0.046	118.63
			D200	0.023	73.88
			D203	0.023	81.78
			E204	0.062	154.41
			K205	0.127	109.05
			G206	0.379	67.71
			A208	0.03	54.56
			W209	0.34	69.89
			L211	0.224	108.78
			S213	0.039	80.32
			E216	0.056	101.84
			E217	0.178	100.62
			A220	0.023	54.47
			E221	0.159	71.18
			K232	0.441	109.15
			E233	0.748	123.88
			R234	0.541	119.76
			D236	0.651	76.46
			P237	0.162	88.76
			S238	0.208	71.56
			E239	0.437	67.67
			A241	0.214	60.06
			N242	0.172	126.15
			K244	0.386	95.73
			A245	0.146	67.91
			Q246	0.133	73.38
			R250	0.418	118.81
			S252	0.023	79.15
			H255	0.023	141.68
			N256	0.023	62.96
			K258	0.221	67.26
			A259	0.049	100.27
			N260	0.204	60.21
			V270	0.596	102.62
			D271	0.531	84.57
			T275	0.243	89.63
			D276	0.211	72.38
			K279	0.428	150.18
			P281	0.114	97.3
			W284	0.353	59.23
			F286	0.564	114.73
			Q287	0.269	81.84
			A289	0.848	52.57
			R306	0.068	150.14
			D307	0.088	58.73
			V309	0.509	120.35
			L310	0.645	90.82
2FZC	B	Surface	D4	0.297	105.19
			N5	0.283	82.41
			K6	0.349	186.32
			L7	0.75	129.31
			Q8	0.369	66.83
			R14	0.461	90.6
			P22	0.375	55.78
			Q24	0.599	76.34
			K28	0.487	64.91
			L32	0.507	54.92
			K34	0.29	122.15
			E37	0.04	113.99
			D39	0.119	106.52
			Q40	0.047	56.75
			P49	0.145	63.86
			G51	0.172	70.49
			M53	0.237	164.93
			R55	0.139	123.48
			F65	0.218	70.71
			E68	0.191	122.86
			D69	0.204	95
			Q70	0.764	91.49
			P79	0.862	57.88
			Q80	0.237	117.21
			R85	0.685	103.15
			D87	0.428	72.79
			V92	0.422	116.78
			S95	0.178	50.65
			R96	0.112	123.98
			S98	0.014	69.25
			L99	0.395	52.99
			E101	0.073	143.43
			R102	0.02	123.29
			N105	0.402	96.59
			V108	0.257	69.81
			S112	0.639	105.52
			N113	0.619	58.94
			H117	0.645	75.95
			A118	0.185	80.63
			P120	0.415	80.55
			S122	0.007	58.45
			R128	0.158	116.97
			K129	0.027	129.98
			R130	0.244	103.64
			A131	0.06	92.15
			N132	0.053	154.08
			K137	0.435	71.7
			K139	0.165	77.15
			K143	0.494	66.54
			E144	0.264	66.83
			N148	0.079	90.24
			V149	0.329	75.19
			L151	0.106	63.28
			A152	0.093	84.07
			N153	0.514	126.06
Conservation scores of catalytic, allosteric, and surface residues of GPb
PDB	Chain	Type	Residue	Conservation Score	Surface Area (Å2)
7GPB	A	Catalytic Site	Y90	0.87	31.37
			N133	0.99	41.24
			G134	0.93	33.66
			G135	0.866	47.65
			R138	0.972	10.65
			I486	0.627	1.58
			W491	0.704	0.49
			V567	0.651	15.77
			K568	0.947	29.54
			R569	0.972	128.98
			K574	0.947	24.6
			Y648	0.725	40.68
			R649	0.622	47.49
			V650	0.851	4.22
			S651	0.77	2.89
			A653	0.792	4.22
			I657	0.538	1.45
			Q665	0.87	8.93
			E672	0.953	27.97
			S674	1	5.61
			G675	0.93	17.46
			T676	1	12.14
			G677	0.815	21.55
			N678	0.99	4.19
			K680	0.947	14.55
7GPB	A	Allosteric Site	W67	0.512	29
			I68	0.381	7.46
			R69	0.171	75.44
			Q71	0.27	23.06
			Q72	0.205	35.85
			H73	0.165	61.93
			Y75	0.16	56.36
			E76	0.078	111.09
			Y155	0.283	7.87
			R193	0.759	11.98
			F196	0.23	58.54
			D227	0.972	1.76
			R242	0.891	10.27
			R309	0.474	79.92
			R310	0.635	17.81
			S313	0.149	63.74
			S314	0.141	0.2
			K315	0.355	109.37
7GPB	A	Surface	R10	0.102	135.79
			K11	0.077	150.7
			Q12	0.134	79.79
			R16	0.072	167.15
			G17	0.094	57.98
			A19	0.098	56.04
			V21	0.146	51.43
			E22	0.148	88.9
			N23	0.333	56.59
			T25	0.055	82.02
			E26	0.201	54.32
			K29	0.18	114.11
			R43	0.191	87.49
			N44	0.044	100.89
			V45	0.222	87.35
			T47	0.425	61.41
			P48	0.059	69.63
			K77	0.048	130.57
			E105	0.14	51.27
			N106	0.092	128.63
			D109	0.187	63.82
			E110	0.143	64.12
			Y113	0.031	142.77
			Q114	0.203	67.88
			D118	0.229	72.36
			E120	0.345	134.6
			E121	0.178	105.9
			E124	0.226	69.49
			E127	0.264	77.3
			E162	0.495	51.85
			K169	0.148	76.87
			C171	0.161	74.79
			G172	0.369	63.44
			W174	0.143	59.51
			M176	0.377	93.26
			E178	0.184	83.23
			A179	0.752	63.62
			D181	0.36	57.43
			R184	0.369	137.53
			Y185	0.174	53.13
			E195	0.452	70.01
			P199	0.2	60.48
			H201	0.274	61.31
			Y203	0.488	56.1
			R205	0.31	59.02
			E207	0.248	59.83
			H208	0.178	112.33
			T209	0.311	52.26
			S210	0.031	130.96
			Q211	0.044	136.83
			K214	0.209	91.81
			D217	0.432	97.32
			Q219	0.406	58.89
			R234	0.087	92.88
			K247	0.342	81.31
			N250	0.32	57.4
			D251	0.404	55.62
			F252	0.633	54.19
			N253	0.429	71.21
			L254	0.638	131
			K255	0.173	108.58
			D256	0.335	83.28
			F257	0.832	138.55
			N258	0.844	81.88
			G260	0.863	63.36
			G261	0.494	69.02
			Y262	0.732	57.18
			I263	0.234	57.01
			Q264	0.231	55.16
			L271	0.188	52.21
			Y280	0.909	73.1
			P281	0.94	89.57
			E287	0.339	158.63
			G288	0.93	55.41
			K289	0.706	78.97
			E290	0.643	52.17
			Q305	0.67	56
			K312	0.247	65.36
			C318	0.124	136.46
			R319	0.262	102.18
			D320	0.157	54.59
			P321	0.129	103.31
			V322	0.49	72.04
			R323	0.303	168.38
			D327	0.044	64.2
			D331	0.128	93.54
			K332	0.3	54.71
			L356	0.136	109.81
			R358	0.044	182.8
			D360	0.031	92.33
			D362	0.243	85.99
			K363	0.055	52.87
			E366	0.065	76.83
			K370	0.071	75.62
			I380	0.739	74.17
			P381	0.649	64.43
			E382	0.89	113.36
			A383	0.902	59.08
			R386	0.57	70.8
			H390	0.074	63.26
			E393	0.178	91.2
			T394	0.19	78.77
			Q401	0.418	61
			Y404	0.386	85.71
			E405	0.476	60
			Q408	0.216	118.17
			R409	0.338	85.03
			N412	0.081	98.98
			R413	0.031	107.28
			A416	0.044	88.35
			P419	0.415	97.53
			G420	0.162	76.62
			V422	0.031	112.98
			D423	0.052	59.24
			R426	0.269	71.8
			R427	0.482	105.96
			E432	0.52	62.25
			E433	0.744	88.73
			V436	0.044	78.93
			K437	0.519	69.21
			R438	0.317	76.78
			H450	0.653	66.67
			R457	0.408	99.81
			E461	0.242	64.53
			K465	0.068	110.44
			T466	0.327	97.66
			K469	0.207	77.92
			Y472	0.272	76.98
			E473	0.212	89.56
			P476	0.802	59.21
			H477	0.2	144.99
			P497	0.771	81.29
			E501	0.031	117.51
			E505	0.166	122.54
			E509	0.113	74.45
			E510	0.031	97.37
			D516	0.206	72.81
			R519	0.048	94.15
			K520	0.031	96.37
			L522	0.279	63.58
			S523	0.031	89.8
			Y524	0.099	57.03
			D526	0.172	76.1
			D527	0.587	52.97
			E528	0.031	76.02
			R532	0.031	140.75
			K536	0.031	95.93
			Q539	0.154	97.06
			E540	0.044	70.14
			L543	0.031	79.8
			K544	0.291	134.55
			E550	0.118	78.65
			R551	0.031	154.01
			E552	0.073	64.31
			Y553	0.35	86.82
			K554	0.268	168.59
			H556	0.052	102.06
			N560	0.115	119.02
			R589	0.318	82.11
			K591	0.522	71.17
			K592	0.156	160.66
			E593	0.357	90.66
			N595	0.031	154.22
			K596	0.031	131.54
			F597	0.108	125.02
			P611	0.789	57.95
			G612	0.757	68.89
			Y613	0.909	53.5
			H614	0.153	94
			D628	0.119	82.78
			H632	0.337	134.85
			P634	0.433	119.32
			V635	0.186	63.15
			D638	0.279	50.38
			R639	0.238	53.88
			K655	0.21	54.79
			E701	0.58	83.81
			E705	0.123	83.42
			E706	0.343	135.1
			R714	0.438	96.18
			V715	0.544	64.3
			E716	0.196	104.28
			D719	0.044	88.61
			R720	0.031	133.07
			Q723	0.103	110.19
			R724	0.031	122.41
			E730	0.031	53.22
			D733	0.031	87.25
			R734	0.031	146.27
			P736	0.127	92.1
			R739	0.156	70.91
			Q740	0.1	79.86
			E743	0.297	102.61
			S747	0.213	78.2
			F749	0.067	93.18
			P752	0.371	90.7
			K753	0.285	163.49
			D756	0.093	68.2
			K759	0.168	90.1
			D760	0.251	50.74
			N763	0.237	57.78
			H767	0.062	94.81
			H768	0.181	114.36
			R770	0.254	155
			E778	0.28	90.96
			E779	0.449	75.58
			K782	0.087	68.1
			E785	0.044	76.75
			R786	0.031	124.25
			L790	0.292	50.53
			K792	0.169	115.31
			N793	0.267	69.93
			P794	0.104	100.4
			R795	0.031	95.81
			E796	0.055	51.67
			R803	0.215	79.81
			R815	0.844	54.04
			Q819	0.644	61.29
			R822	0.083	133.27
			E823	0.11	92.66
			G826	0.197	50.95
			E828	0.084	114.19
			R831	0.031	88.92
			Q832	0.18	131.38
			R833	0.091	118.33
			P835	0.363	104.44
			P837	0.152	78.51
Conservation scores of catalytic, allosteric, and surface residues of FBPase
PDB	Chain	Type	Residue	Conservation Score	Surface Area (Å2)
2Q8M	A	Catalytic Site	E89	0.958	40.68
			E90	0.958	77.4
			D110	0.976	7.82
			L112	0.816	42.07
			D113	0.976	7.62
			G114	0.937	17.62
			S115	0.937	62.3
			S116	1	89.23
			N206	0.997	57.13
			N209	0.72	41.8
			Y239	0.868	77.11
			G241	0.865	40.32
			S242	0.901	0.42
			L243	0.729	13.84
			V244	0.985	2.99
			D246	0.862	0.22
			Y257	0.717	6.56
			Y259	0.907	19.18
			H265	0.309	47.99
			K269	0.84	88.59
			L270	0.94	9.33
			E275	0.958	21.77
2Q8M	A	Allosteric Site (B6G)	Y203	0.71	10.35
			E207	0.65	64.45
			Y210	0.399	75.21
			K218	0.242	48.1
			I221	0.303	7.13
			K222	0.139	120.79
			Q225	0.605	99.86
2Q8M	A	Allosteric Site (AMP)	F7	0.197	6.61
			I8	0.562	7.15
			V9	0.448	55.82
			K11	0.275	40.76
			Q12	0.623	43.6
			F15	0.013	131.11
			H17	0.061	170.3
			A18	0.508	43.49
			T19	0.39	94.22
			G20	0.463	17.96
			E21	0.333	46.89
			L22	0.333	44.33
			T23	0.547	22.46
			L26	0.336	14.16
			K104	0.384	53.2
			Y105	0.747	11.44
			R132	0.185	125.27
			V154	0.638	27.73
			Y169	0.59	5.84
			T171	0.42	45.75
2Q8M	A	Surface	K2	0.194	108.46
			E10	0.417	71.69
			H13	0.167	101.69
			E14	0.07	118.6
			S16	0.136	103.02
			R38	0.363	77.45
			D39	0.206	53.13
			K42	0.46	112.48
			G44	0.49	93.71
			L45	0.602	154.38
			F68	0.221	198.03
			E71	0.17	116.02
			K78	0.173	102.04
			A79	0.354	83.3
			R80	0.614	63.87
			D81	0.481	63.05
			D92	0.236	114.92
			E93	0.085	124.43
			V96	0.049	64.51
			E98	0.182	148.32
			E101	0.121	51.17
			H102	0.161	111.49
			I118	0.789	63.14
			D119	0.88	122.42
			V134	0.067	81.91
			P136	0.109	93.3
			V137	0.028	80.64
			T139	0.04	53.86
			P140	0.034	78.99
			T142	0.158	61.26
			E143	0.067	75.82
			E144	0.034	107.82
			N151	0.124	64.44
			K152	0.052	112.75
			C173	0.1	63.52
			P182	0.629	104.51
			L189	0.735	51.2
			C190	0.756	76.68
			Q191	0.402	86.81
			E192	0.152	98.96
			R193	0.236	118.11
			R195	0.058	155.27
			E198	0.028	143.14
			K199	0.028	109.32
			K201	0.079	112.32
			I211	0.164	126.77
			K212	0.155	123.02
			N215	0.013	62.42
			K219	0.2	87.06
			E226	0.088	86.91
			E227	0.209	135.36
			K229	0.055	174
			S230	0.369	99.36
			T231	0.224	64.66
			N232	0.146	62.25
			L252	0.342	94.33
			K253	0.698	150.74
			S264	0.469	83.11
			P266	0.318	97.26
			D267	0.112	99.58
			G287	0.855	51.34
			K289	0.133	64.89
			K294	0.013	168.15
			E295	0.013	80.08
			R296	0.544	105.17
			D299	0.43	67.1
			I301	0.082	115.87
			E303	0.028	134.57
			T304	0.037	74.54
			R308	0.75	78.46
			R309	0.405	62.23
			D316	0.073	61.59
			H317	0.091	70.26
			E320	0.106	84.85
			R324	0.028	86.28
			R327	0.013	154.23
			E328	0.188	97.62
			F329	0.043	81.48
			P330	0.046	94.52
			D331	0.278	77.54
			A332	0.426	162.49
