# Supplementary material for: Rational Engineering of Enzyme Allosteric Regulation through Sequence Evolution Analysis
Source: PLoS Comput Biol. 2012 Jul 12;8(7):e1002612. doi: 10.1371/journal.pcbi.1002612 (PMC3395594; doi:10.1371/journal.pcbi.1002612)
Supplement: Table S7 — Amino acid substitutions at the engineered sites found in homologous sequences. (XLS) [file pcbi.1002612.s011.xls]

## Sheet: Table S7
Table S7. Amino acid substitutions at the engineered sites found in homologous sequences.
Allosteric Residues	Mutation	Count in homologue sequences	Ratio in homologue sequences	Conservation Score	Removing allosteric regulation without enzyme activity loss	Enzyme Activity	Allosteric Inhibition
AMP binding pocket
R132	A	0	0	0.185	O	Sustained	Decreased
	E	3	0.0206897		O	Sustained	Decreased
	I	0	0		O	Sustained	Decreased
K104	Q	0	0	0.384	O	Sustained	Decreased
T23	V	1	0.00689655	0.547	X	Lost	Not detected
Y105	I	0	0	0.747	X	Lost	Not detected
G6P binding pocket
K222	A	6	0.0413793	0.139	O	Sustained	Decreased
	E	21	0.144828		O	Sustained	Decreased
	I	0	0		O	Sustained	Decreased
	Q	13	0.0896552		X	Lost	Not detected
K218	Q	20	0.137931	0.242	O	Sustained	Decreased
	A	7	0.0482759		X	Lost	Not detected
	E	0	0		X	Lost	Not detected
	I	0	0		X	Lost	Not detected
Y210	F	1	0.00689655	0.399	O	Sustained	Decreased
	I	0	0		O	Sustained	Decreased
Q225	I	0	0	0.605	X	Lost	Not detected
	L	35	0.241379		X	Lost	Not detected
E207	I	0	0	0.65	X	Lost	Not detected
	L	0	0		X	Lost	Not detected
Y203	F	41	0.282759	0.71	X	Lost	Not detected
