# Supplementary material for: Rational Engineering of Enzyme Allosteric Regulation through Sequence Evolution Analysis
Source: PLoS Comput Biol. 2012 Jul 12;8(7):e1002612. doi: 10.1371/journal.pcbi.1002612 (PMC3395594; doi:10.1371/journal.pcbi.1002612)
Supplement: Table S8 — Conservation scores of the catalytic and allosteric sites of 56 enzymes by other sequence analysis methods. (XLS) [file pcbi.1002612.s012.xls]

## Sheet: Table S8
Table S8. Conservation scores of the catalytic and allosteric sites of 56 enzymes by other sequence analysis methods.
	catalytic sites			allosteric sites
Conservation scores	number	mean	std		mean	std	Mann-Whitney U test
VALDAR	212	7.13913e+06	1.42662e+07	490	1.11706e+07	1.76994e+07	9.73667e-08
WILLIAMSON	212	-4.28813	1.28045	490	-3.98892	0.686207	1.14178e-13
SANDER	212	7.97551e+07	6.32028e+08	490	3.82009e+08	5.18706e+08	2.46972e-20
MIRNY	212	-0.738392	0.477907	490	-0.239311	0.355869	2.35524e-38
THOMPSON	212	6.81675	3.91601	490	2.45857	3.24017	2.00989e-38
TAYLOR_GAPS	212	19.6388	4.4417	490	12.2028	8.57164	1.38317e-38
ZVELIBIL	212	0.194898	0.274929	490	0.573113	0.35473	1.2559e-39
GERSTEIN	212	-0.945794	0.747222	490	-1.84721	0.657835	7.03002e-42
LANDGRAF	212	1025.61	661.071	490	311.064	469.411	1.03125e-42
SHENKIN	212	25.1875	16.6378	490	10.1655	8.04631	2.77768e-47
SCHNEIDER	212	0.403496	0.229962	490	0.119486	0.169644	2.71157e-47
TAYLOR_NO_GAPS	212	18.6184	5.53055	490	9.5	8.01679	1.51644e-47
NOT_LANCET	212	1.63686	3.85205	490	6.46982	2.80958	8.0067e-49
ARMON	212	111.462	102.465	490	19.5294	46.3762	3.95667e-49
KARLIN	212	0.319565	0.324692	490	0.801679	0.274663	1.80514e-51
KABAT	212	35.1213	48.8486	490	5.10175	8.59809	2.60138e-55
JORES	212	1308.82	4159.23	490	42.9249	197.541	7.14835e-56
