# Supplementary material for: Rational Engineering of Enzyme Allosteric Regulation through Sequence Evolution Analysis
Source: PLoS Comput Biol. 2012 Jul 12;8(7):e1002612. doi: 10.1371/journal.pcbi.1002612 (PMC3395594; doi:10.1371/journal.pcbi.1002612)
Supplement: Table S9 — Conservation scores of catalytic, allosteric, and surface residues of ATCase, GPb, and FBPase calculated by using ortholog sequences. (XLS) [file pcbi.1002612.s013.xls]

## Sheet: Table S9
Table S9. Conservation scores of catalytic, allosteric, and surface residues of ATCase, GPb, and FBPase calculated by using ortholog sequences
Conservation scores of catalytic, allosteric, and surface residues of ATCase
PDB	Chain	Type	Residue	Conservation Score	Surface Area (Å2)
2FZC	A	Catalytic Site	E50	0.907	57.73
			A51	0.571	51.54
			S52	1	17.37
			T53	0.949	84.29
			R54	0.988	131
			T55	0.994	14.75
			R105	0.988	28.81
			A127	0.823	0
			H134	0.988	8.61
			Q137	0.988	17.28
			R167	0.988	39.11
			T168	0.868	14.87
			R229	0.988	95.77
			P266	0.946	32.22
			L267	0.859	26.76
			P268	0.946	61.16
2FZC	B	Allosteric Site	T2	0.369	94.58
			H3	0.198	21.76
			E10	0.593	12.48
			A11	0.645	33.72
			I12	0.895	8.77
			K13	0.231	73.67
			V17	0.889	13.92
			D19	0.987	28.15
			H20	0.994	66.21
			E52	0.356	111.27
			K56	0.981	25.47
			L58	0.777	9.28
			K60	0.981	6.26
			T82	0.829	13.14
			N84	0.869	10.03
			I86	0.744	11.89
			N88	0.402	119.15
			Y89	0.435	120.04
			E90	0.073	116.42
			V91	0.783	61.3
			K94	0.981	150.23
2FZC	A	Surface	A1	0.11	92.57
			P3	0.071	94.21
			Y5	0.1	74.56
			Q6	0.281	70.07
			K7	0.336	84.91
			H8	0.63	61.53
			N13	0.184	76.82
			D14	0.413	76.58
			S16	0.255	54.54
			R17	0.194	79.17
			D18	0.039	106.67
			N21	0.039	54.73
			K29	0.088	76.13
			K31	0.381	77.49
			A32	0.094	73.66
			N33	0.165	102.08
			P34	0.362	95.99
			Q35	0.288	54.55
			P36	0.22	80.17
			E37	0.239	105.56
			K40	0.175	109.5
			H41	0.649	158.21
			K42	0.397	65.12
			V43	0.588	50.73
			R56	0.736	57.23
			L57	0.494	96.4
			T61	0.475	50.69
			H64	0.484	104.73
			R65	0.723	153.1
			S69	0.378	59.85
			V71	0.481	77.03
			G72	0.52	51.97
			F73	0.526	51.9
			D75	0.42	96
			A77	0.217	89.06
			N78	0.371	78.82
			S80	0.9	62.17
			L81	0.852	55.02
			K83	0.31	118.32
			K84	0.959	133.88
			G85	0.904	57.66
			E86	0.959	64.05
			D90	0.917	71.38
			V94	0.771	59.89
			T97	0.675	110.27
			Y98	0.794	141.05
			D100	0.778	51.41
			P107	0.197	54.74
			E117	0.075	71.11
			F118	0.233	61.23
			G120	0.062	63.98
			N121	0.136	121.97
			S131	0.368	54.92
			E147	0.407	77.07
			G150	0.352	63.12
			R151	0.039	99.49
			N154	0.4	88.96
			H156	0.259	53.17
			K164	0.433	81.86
			Y165	0.826	87.92
			D180	0.507	84.01
			R183	0.117	86.28
			D190	0.126	140.95
			A191	0.584	52.25
			Q196	0.046	111.27
			Y197	0.168	118.63
			D200	0.055	73.88
			D203	0.046	81.78
			E204	0.078	154.41
			K205	0.21	109.05
			G206	0.091	67.71
			A208	0.3	54.56
			W209	0.081	69.89
			L211	0.049	108.78
			S213	0.159	80.32
			E216	0.513	101.84
			E217	0.365	100.62
			A220	0.223	54.47
			E221	0.207	71.18
			K232	0.384	109.15
			E233	0.959	123.88
			R234	0.41	119.76
			D236	0.71	76.46
			P237	0.146	88.76
			S238	0.236	71.56
			E239	0.681	67.67
			A241	0.268	60.06
			N242	0.155	126.15
			K244	0.359	95.73
			A245	0.652	67.91
			Q246	0.471	73.38
			R250	0.43	118.81
			S252	0.113	79.15
			H255	0.052	141.68
			N256	0.039	62.96
			K258	0.313	67.26
			A259	0.065	100.27
			N260	0.246	60.21
			V270	0.704	102.62
			D271	0.707	84.57
			T275	0.404	89.63
			D276	0.068	72.38
			K279	0.452	150.18
			P281	0.039	97.3
			W284	0.394	59.23
			F286	0.53	114.73
			Q287	0.23	81.84
			A289	0.849	52.57
			R306	0.107	150.14
			D307	0.039	58.73
			V309	0.039	120.35
			L310	0.039	90.82
2FZC	B	Surface	D4	0.172	105.19
			N5	0.27	82.41
			K6	0.382	186.32
			L7	0.797	129.31
			Q8	0.356	66.83
			R14	0.395	90.6
			P22	0.461	55.78
			Q24	0.606	76.34
			K28	0.487	64.91
			L32	0.514	54.92
			K34	0.264	122.15
			E37	0.257	113.99
			D39	0.191	106.52
			Q40	0.283	56.75
			P49	0.119	63.86
			G51	0.086	70.49
			M53	0.204	164.93
			R55	0.093	123.48
			F65	0.316	70.71
			E68	0.178	122.86
			D69	0.185	95
			Q70	0.77	91.49
			P79	0.882	57.88
			Q80	0.099	117.21
			R85	0.678	103.15
			D87	0.448	72.79
			V92	0.481	116.78
			S95	0.218	50.65
			R96	0.106	123.98
			S98	0.027	69.25
			L99	0.415	52.99
			E101	0.04	143.43
			R102	0.047	123.29
			N105	0.422	96.59
			V108	0.29	69.81
			S112	0.612	105.52
			N113	0.652	58.94
			H117	0.619	75.95
			A118	0.25	80.63
			P120	0.448	80.55
			S122	0.007	58.45
			R128	0.112	116.97
			K129	0.165	129.98
			R130	0.053	103.64
			A131	0.02	92.15
			N132	0.033	154.08
			K137	0.428	71.7
			K139	0.132	77.15
			K143	0.468	66.54
			E144	0.31	66.83
			N148	0.125	90.24
			V149	0.329	75.19
			L151	0.06	63.28
			A152	0.283	84.07
			N153	0.158	126.06
Conservation scores of catalytic, allosteric, and surface residues of GPb
PDB	Chain	Type	Residue	Conservation Score	Surface Area (Å2)
7GPB	A	Catalytic Site	Y90	0.143	31.37
			N133	0.929	41.24
			G134	0.243	33.66
			G135	0.243	47.65
			R138	0.554	10.65
			I486	0.877	1.58
			W491	0.096	0.49
			V567	0.752	15.77
			K568	0.421	29.54
			R569	0.554	128.98
			K574	0.421	24.6
			Y648	0.143	40.68
			R649	0.554	47.49
			V650	0.752	4.22
			S651	1	2.89
			A653	0.073	4.22
			I657	0.877	1.45
			Q665	0.641	8.93
			E672	0.486	27.97
			S674	1	5.61
			G675	0.243	17.46
			T676	0.971	12.14
			G677	0.243	21.55
			N678	0.929	4.19
			K680	0.421	14.55
7GPB	A	Allosteric Site	W67	0.096	29
			I68	0.877	7.46
			R69	0.554	75.44
			Q71	0.641	23.06
			Q72	0.641	35.85
			H73	0.666	61.93
			Y75	0.143	56.36
			E76	0.037	111.09
			Y155	0.143	7.87
			R193	0.554	11.98
			F196	0.187	58.54
			D227	0.606	1.76
			R242	0.554	10.27
			R309	0.554	79.92
			R310	0.554	17.81
			S313	1	63.74
			S314	1	0.2
			K315	0.421	109.37
7GPB	A	Surface	R10	0.554	135.79
			K11	0.421	150.7
			Q12	0.641	79.79
			R16	0.554	167.15
			G17	0.243	57.98
			A19	0.821	56.04
			V21	0.752	51.43
			E22	0.486	88.9
			N23	0.929	56.59
			T25	0.075	82.02
			E26	0.049	54.32
			K29	0.421	114.11
			R43	0.554	87.49
			N44	0.929	100.89
			V45	0.752	87.35
			T47	0.971	61.41
			P48	0.37	69.63
			K77	0.421	130.57
			E105	0.486	51.27
			N106	0.929	128.63
			D109	0.606	63.82
			E110	0.486	64.12
			Y113	0.143	142.77
			Q114	0.641	67.88
			D118	0.606	72.36
			E120	0.486	134.6
			E121	0.486	105.9
			E124	0.486	69.49
			E127	0.486	77.3
			E162	0.486	51.85
			K169	0.421	76.87
			C171	0.005	74.79
			G172	0.243	63.44
			W174	0.096	59.51
			M176	0.689	93.26
			E178	0.486	83.23
			A179	0.821	63.62
			D181	0.052	57.43
			R184	0.554	137.53
			Y185	0.143	53.13
			E195	0.486	70.01
			P199	0.37	60.48
			H201	0.666	61.31
			Y203	0.143	56.1
			R205	0.055	59.02
			E207	0.486	59.83
			H208	0.666	112.33
			T209	0.971	52.26
			S210	1	130.96
			Q211	0.641	136.83
			K214	0.421	91.81
			D217	0.606	97.32
			Q219	0.641	58.89
			R234	0.554	92.88
			K247	0.421	81.31
			N250	0.016	57.4
			D251	0.041	55.62
			F252	0.187	54.19
			N253	0.929	71.21
			L254	0.328	131
			K255	0.421	108.58
			D256	0.606	83.28
			F257	0.187	138.55
			N258	0.929	81.88
			G260	0.243	63.36
			G261	0.243	69.02
			Y262	0.143	57.18
			I263	0.877	57.01
			Q264	0.641	55.16
			L271	0.328	52.21
			Y280	0.143	73.1
			P281	0.37	89.57
			E287	0.486	158.63
			G288	0.243	55.41
			K289	0.421	78.97
			E290	0.486	52.17
			Q305	0.641	56
			K312	0.421	65.36
			C318	0.02	136.46
			R319	0.036	102.18
			D320	0.606	54.59
			P321	0.37	103.31
			V322	0.752	72.04
			R323	0.554	168.38
			D327	0.606	64.2
			D331	0.606	93.54
			K332	0.421	54.71
			L356	0.03	109.81
			R358	0.554	182.8
			D360	0.058	92.33
			D362	0.058	85.99
			K363	0.421	52.87
			E366	0.017	76.83
			K370	0.04	75.62
			I380	0.328	74.17
			P381	0.37	64.43
			E382	0.486	113.36
			A383	0.821	59.08
			R386	0.554	70.8
			H390	0.666	63.26
			E393	0.486	91.2
			T394	0.971	78.77
			Q401	0.641	61
			Y404	0.143	85.71
			E405	0.486	60
			Q408	0.641	118.17
			R409	0.554	85.03
			N412	0.929	98.98
			R413	0.554	107.28
			A416	0.821	88.35
			P419	0.37	97.53
			G420	0.243	76.62
			V422	0.752	112.98
			D423	0.606	59.24
			R426	0.554	71.8
			R427	0.554	105.96
			E432	0.486	62.25
			E433	0.486	88.73
			V436	0.752	78.93
			K437	0.421	69.21
			R438	0.554	76.78
			H450	0.666	66.67
			R457	0.554	99.81
			E461	0.486	64.53
			K465	0.421	110.44
			T466	0.971	97.66
			K469	0.421	77.92
			Y472	0.143	76.98
			E473	0.486	89.56
			P476	0.37	59.21
			H477	0.666	144.99
			P497	0.37	81.29
			E501	0.486	117.51
			E505	0.486	122.54
			E509	0.486	74.45
			E510	0.002	97.37
			D516	0.606	72.81
			R519	0.554	94.15
			K520	0.421	96.37
			L522	0.328	63.58
			S523	1	89.8
			Y524	0.023	57.03
			D526	0.606	76.1
			D527	0.606	52.97
			E528	0.043	76.02
			R532	0.554	140.75
			K536	0.421	95.93
			Q539	0.641	97.06
			E540	0.486	70.14
			L543	0.328	79.8
			K544	0.421	134.55
			E550	0.486	78.65
			R551	0.006	154.01
			E552	0.486	64.31
			Y553	0.143	86.82
			K554	0.421	168.59
			H556	0.666	102.06
			N560	0.929	119.02
			R589	0.554	82.11
			K591	0.421	71.17
			K592	0.021	160.66
			E593	0.486	90.66
			N595	0.929	154.22
			K596	0.042	131.54
			F597	0.187	125.02
			P611	0.37	57.95
			G612	0.243	68.89
			Y613	0.025	53.5
			H614	0.666	94
			D628	0.606	82.78
			H632	0.666	134.85
			P634	0.37	119.32
			V635	0.008	63.15
			D638	0.606	50.38
			R639	0.554	53.88
			K655	0.421	54.79
			E701	0.486	83.81
			E705	0.486	83.42
			E706	0.049	135.1
			R714	0.554	96.18
			V715	0.752	64.3
			E716	0.486	104.28
			D719	0.01	88.61
			R720	0.053	133.07
			Q723	0.641	110.19
			R724	0.054	122.41
			E730	0.486	53.22
			D733	0.606	87.25
			R734	0.554	146.27
			P736	0.37	92.1
			R739	0.554	70.91
			Q740	0.059	79.86
			E743	0.05	102.61
			S747	1	78.2
			F749	0.187	93.18
			P752	0.37	90.7
			K753	0.421	163.49
			D756	0.606	68.2
			K759	0.421	90.1
			D760	0.606	50.74
			N763	0.929	57.78
			H767	0.666	94.81
			H768	0.666	114.36
			R770	0.554	155
			E778	0.486	90.96
			E779	0.047	75.58
			K782	0.421	68.1
			E785	0.047	76.75
			R786	0.018	124.25
			L790	0.328	50.53
			K792	0.421	115.31
			N793	0.929	69.93
			P794	0.37	100.4
			R795	0.554	95.81
			E796	0.486	51.67
			R803	0.554	79.81
			R815	0.554	54.04
			Q819	0.641	61.29
			R822	0.554	133.27
			E823	0.486	92.66
			G826	0.243	50.95
			E828	0.486	114.19
			R831	0.554	88.92
			Q832	0.641	131.38
			R833	0.554	118.33
			P835	0.37	104.44
			P837	0.37	78.51
Conservation scores of catalytic, allosteric, and surface residues of FBPase
PDB	Chain	Type	Residue	Conservation Score	Surface Area (Å2)
2Q8M	A	Catalytic Site	E89	0.961	40.68
			E90	0.991	77.4
			D110	0.97	7.82
			L112	0.913	42.07
			D113	1	7.62
			G114	0.976	17.62
			S115	0.985	62.3
			S116	0.943	89.23
			N206	0.949	57.13
			N209	0.813	41.8
			Y239	0.904	77.11
			G241	0.916	40.32
			S242	0.813	0.42
			L243	0.786	13.84
			V244	0.925	2.99
			D246	0.871	0.22
			Y257	0.822	6.56
			Y259	0.955	19.18
			H265	0.315	47.99
			K269	0.865	88.59
			L270	0.901	9.33
			E275	0.991	21.77
2Q8M	A	Allosteric Site (B6G)	Y203	0.641	10.35
			E207	0.611	64.45
			Y210	0.23	75.21
			K218	0.396	48.1
			I221	0.357	7.13
			K222	0.475	120.79
			Q225	0.565	99.86
2Q8M	A	Allosteric Site (AMP)	F7	0.284	6.61
			I8	0.629	7.15
			V9	0.281	55.82
			K11	0.2	40.76
			Q12	0.417	43.6
			F15	0.106	131.11
			H17	0.04	170.3
			A18	0.221	43.49
			T19	0.227	94.22
			G20	0.158	17.96
			E21	0.224	46.89
			L22	0.411	44.33
			T23	0.345	22.46
			L26	0.342	14.16
			K104	0.203	53.2
			Y105	0.535	11.44
			R132	0.312	125.27
			V154	0.508	27.73
			Y169	0.372	5.84
			T171	0.324	45.75
2Q8M	A	Surface	K2	0.266	108.46
			E10	0.257	71.69
			H13	0.248	101.69
			E14	0.082	118.6
			S16	0.218	103.02
			R38	0.182	77.45
			D39	0.194	53.13
			K42	0.318	112.48
			G44	0.59	93.71
			L45	0.659	154.38
			F68	0.291	198.03
			E71	0.191	116.02
			K78	0.079	102.04
			A79	0.167	83.3
			R80	0.399	63.87
			D81	0.303	63.05
			D92	0.354	114.92
			E93	0.07	124.43
			V96	0.046	64.51
			E98	0.212	148.32
			E101	0.161	51.17
			H102	0.112	111.49
			I118	0.771	63.14
			D119	0.795	122.42
			V134	0.206	81.91
			P136	0.052	93.3
			V137	0.076	80.64
			T139	0.085	53.86
			P140	0.091	78.99
			T142	0.103	61.26
			E143	0.088	75.82
			E144	0.04	107.82
			N151	0.109	64.44
			K152	0.1	112.75
			C173	0.058	63.52
			P182	0.408	104.51
			L189	0.605	51.2
			C190	0.599	76.68
			Q191	0.278	86.81
			E192	0.121	98.96
			R193	0.209	118.11
			R195	0.04	155.27
			E198	0.061	143.14
			K199	0.124	109.32
			K201	0.073	112.32
			I211	0.423	126.77
			K212	0.454	123.02
			N215	0.04	62.42
			K219	0.336	87.06
			E226	0.448	86.91
			E227	0.118	135.36
			K229	0.366	174
			S230	0.297	99.36
			T231	0.62	64.66
			N232	0.097	62.25
			L252	0.185	94.33
			K253	0.825	150.74
			S264	0.127	83.11
			P266	0.351	97.26
			D267	0.067	99.58
			G287	0.849	51.34
			K289	0.197	64.89
			K294	0.176	168.15
			E295	0.04	80.08
			R296	0.469	105.17
			D299	0.556	67.1
			I301	0.04	115.87
			E303	0.04	134.57
			T304	0.04	74.54
			R308	0.886	78.46
			R309	0.562	62.23
			D316	0.094	61.59
			H317	0.152	70.26
			E320	0.058	84.85
			R324	0.04	86.28
			R327	0.04	154.23
			E328	0.04	97.62
			F329	0.04	81.48
			P330	0.04	94.52
			D331	0.046	77.54
			A332	0.04	162.49
